# Supplementary material for: NHC-catalyzed [12+2] reaction of polycyclic arylaldehydes for access to indole derivatives
Source: Royal Society of Chemistry journal article supplement (doi:10.1039/d3cc00999h), 2023-01-01

## Supporting Information

### **NHC-catalyzed [12 + 2] reaction of polycyclic arylaldehydes for access to indole derivatives**

Hong Ji,<sup>a†</sup> Juan Zou,<sup>b†</sup> Chengli Mou,<sup>b</sup> Yonggui Liu,<sup>a</sup> Shi-Chao Ren,<sup>\*a</sup> Yonggui Robin Chi<sup>\*a,c</sup>

<sup>a</sup>National Key Laboratory of Green Pesticide, Key Laboratory of Green Pesticide and Agricultural Bioengineering, Ministry of Education, Guizhou University, Guiyang, 550025, China.

<sup>b</sup>School of Pharmacy, Guiyang College of Traditional Chinese Medicine, Huaxi District, Guiyang 550025, China.

<sup>c</sup>School of Chemistry, Chemical Engineering, and Biotechnology, Nanyang Technological University, Singapore 637371, Singapore.

E-mail: [sren@gzu.edu.cn](mailto:sren@gzu.edu.cn); [robinchi@ntu.edu.sg](mailto:robinchi@ntu.edu.sg)

†These authors contributed equally to this work

# Content

|                                                                                   |     |
|-----------------------------------------------------------------------------------|-----|
| 1. General information .....                                                      | S1  |
| 2. Synthesis of substrates .....                                                  | S2  |
| 3. Condition optimization.....                                                    | S4  |
| 4 General procedures for the catalytic reactions .....                            | S5  |
| 5 Characterization of products .....                                              | S7  |
| 6. Large scale reaction and synthetic transformation of <b>3a</b> .....           | S39 |
| 7. Anti-Xoo and anti-Xac activities of Products in Vitro.....                     | S42 |
| 8. References .....                                                               | S44 |
| 9. X-ray crystallography of compound <b>3k</b> . .....                            | S45 |
| 10. <sup>1</sup> H NMR, <sup>13</sup> C NMR and <sup>19</sup> F NMR spectra. .... | S52 |

## 1. General information

Commercially available materials purchased from Energy Chemical and J&K were used as received. Unless otherwise specified, all reactions were carried out in 4.0 mL vial. NMR spectra were measured either on a Bruker ASCEND 400 (400 MHz) Spectrometer. The chemical shift values were corrected to 7.26 ppm ( $^1\text{H}$  NMR), and 77.16 ppm ( $^{13}\text{C}$  NMR) for  $\text{CDCl}_3$ . The chemical shift values were corrected to 5.32 ppm ( $^1\text{H}$  NMR), and 54.00 ppm ( $^{13}\text{C}$  NMR) for  $\text{CD}_2\text{Cl}_2$ .  $^1\text{H}$  NMR splitting patterns are designated as singlet (s), double (d), triplet (t), quartet (q), doublet of doublets (dd), multiplets (m), and etc. All first-order splitting patterns were assigned on the base of the appearance of the multiplet. Splitting patterns that could not be easily interpreted are designated as multiplet (m) or broad (br). High resolution mass spectrometer analysis (HRMS) was performed on Waters Xevo G2-S QToF. Infrared spectra (IR) were obtained on a Thermo Fisher FT/IR-Nicolet iS50 spectrometer, and the absorptions have been reported in wavenumbers ( $\text{cm}^{-1}$ ). Chiral HPLC analysis was performed on a Shimadzu LC-20AD instrument using Daicel Chiracel columns at  $25^\circ\text{C}$  and a mixture of HPLC-grade hexanes and isopropanol as eluent. Optical rotation was measured using a JASCO P-1030 Polarimeter equipped with a sodium vapor lamp at 589 nm and the concentration of samples was denoted as  $c$ . Chiralcel brand chiral columns from Daicel Chemical Industries were used with models IF, IA, IC, IE, AD-H, OD-H in  $4.6 \times 250$  mm size. The racemic products used to determine the  $e_r$  values were synthesized using achiral catalyst. Optical rotations were measured on an Insmark IP-digi Polarimeter in a 1 dm cuvette. The concentration ( $c$ ) is given in g/100 mL. Melting points (m.p.) were measured on a Beijing Tech Instrument X-4 digital display micro melting point apparatus and are uncorrected. Analytical thin-layer chromatography (TLC) was carried out on pre-coated silica gel plate (0.2 mm thickness). Visualization was performed using a UV lamp.

## 2. Synthesis of substrates

### Procedure A:

5H-benzo[a]pyrrolizine-3-carbaldehydes (**1a**) were synthesized according to the reported method<sup>1-2</sup>.

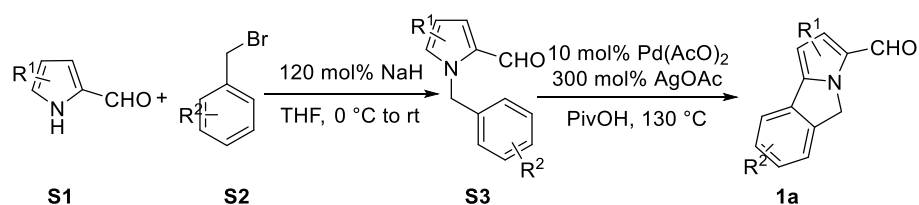

Step 1. sodium hydride (60% dispersion in mineral oil, 1.32 g, 33 mmol) was added to anhydrous DMF (30 mL) in a nitrogen purged two-neck round-bottom flask. The solution was cooled to 0 °C and pyrrole **S1** (2.08 mL, 30 mmol) in anhydrous DMF (8 mL) was added dropwise. The solution was allowed to warm to room temperature and was stirred for 30 minutes before being cooled back to 0 °C when benzyl bromide **S2** (3.57 mL, 30 mmol) was added dropwise. The solution was again allowed to warm to room temperature and was stirred for one hour. The solution was then added to H<sub>2</sub>O and extracted with EA. The combined organic layers were washed with H<sub>2</sub>O before drying over MgSO<sub>4</sub>, filtering, and concentrating under reduced pressure. The crude product was purified by flash column chromatography.

Step 2. The appropriate N-benzyl-2-carboxaldehyde **S3** was stirred with Pd(OAc)<sub>2</sub> (10 mol%) and AgOAc (3 equiv.) in PivOH (75 equiv.) under an argon atmosphere at 130 °C overnight. After cooling, sat. aq. Na<sub>2</sub>CO<sub>3</sub> was carefully added until gas formation ceased. The reaction mixture was extracted with EA (3 times), dried over Na<sub>2</sub>SO<sub>4</sub>, and concentrated in vacuo. The crude product was purified by FC (silica gel) to afford the corresponding 5H-benzo[a]pyrrolizine-3-carbaldehydes **1a**.

**Procedure B:**

1-Benzylindoline-2,3-dione(**2a**) were synthesized according to the reported method.

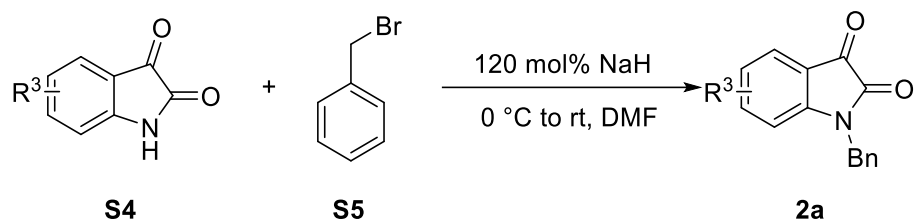

Add DMF (20 ml, 0.25 M), isatin **S4** (736 mg, 5.00 mmol), NaH (60% dispersion in mineral oil, 260 mg, 6.50 mmol) at 0 °C into a 250 ml round bottomed flask under N<sub>2</sub>. Stir the reaction mixture at 0 °C for 0.5 hours. Add BnBr **S5** (713 μl, 6.00 mmol) to the reaction mixture. Stir the reaction mixture at room temperature for 2 hours. Add water (100 ml) and filter the resulting precipitate. Dissolve the precipitate in CH<sub>2</sub>Cl<sub>2</sub>. Wash the precipitate with brine. Dry the combined organic layers over MgSO<sub>4</sub> anhydrous. Filter and concentrate the combined organic layers in vacuo. Purification the combined organic layers by recrystallize from EA (evaporation or precipitation with hexane) to obtain N-benzylisatin<sup>3</sup>.

### 3. Condition optimization

**Table 1.** Condition optimization for the synthesis of **3a**<sup>a</sup>

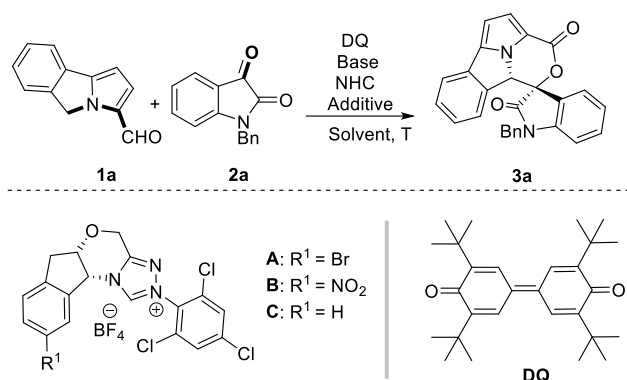

The effects of NHCs, bases, solvents, additive and temperature.<sup>a</sup>

| Entry           | NHC      | Solvent           | Base                                          | additive          | Yield <sup>b</sup> | er <sup>f</sup> | dr <sup>g</sup> |
|-----------------|----------|-------------------|-----------------------------------------------|-------------------|--------------------|-----------------|-----------------|
| 1               | <b>A</b> | CHCl <sub>3</sub> | DIEA                                          |                   | 82%                | 66:34           | 10:1            |
| 2               | <b>B</b> | CHCl <sub>3</sub> | DIEA                                          |                   | 86%                | 65:35           | 8:1             |
| 3               | <b>C</b> | CHCl <sub>3</sub> | DIEA                                          |                   | 81%                | 65:35           | 8:1             |
| 4               | <b>A</b> | PhCF <sub>3</sub> | DIEA                                          |                   | 56%                | 66:34           | 14:1            |
| 5               | <b>A</b> | THF               | DIEA                                          |                   | 62%                | 70:30           | >20:1           |
| 6               | <b>A</b> | THF               | NaHCO <sub>3</sub>                            |                   | 43%                | 67:32           | 13:1            |
| 7               | <b>A</b> | THF               | DABCO                                         |                   | 41%                | 74:26           | 2:1             |
| 8               | <b>A</b> | THF               | ( <i>t</i> -BuO) <sub>2</sub> Mg              |                   | 56%                | 85:15           | 16:1            |
| 9               | <b>A</b> | THF <sup>c</sup>  | ( <i>t</i> -BuO) <sub>2</sub> Mg              |                   | 55%                | 86:14           | 8:1             |
| 10              | <b>A</b> | THF <sup>c</sup>  | ( <i>t</i> -BuO) <sub>2</sub> Mg <sup>d</sup> |                   | 53%                | 89:11           | 6:1             |
| 11              | <b>A</b> | THF <sup>c</sup>  | ( <i>t</i> -BuO) <sub>2</sub> Mg <sup>d</sup> | DIEA              | 64%                | 84:16           | 15:1            |
| 12              | <b>A</b> | THF <sup>c</sup>  | ( <i>t</i> -BuO) <sub>2</sub> Mg <sup>d</sup> | Et <sub>3</sub> N | 75%                | 89:11           | >20:1           |
| 13              | <b>A</b> | THF <sup>c</sup>  | ( <i>t</i> -BuO) <sub>2</sub> Mg <sup>d</sup> | TMEDA             | 78%                | 88:12           | 16:1            |
| 14 <sup>e</sup> | <b>A</b> | THF <sup>c</sup>  | ( <i>t</i> -BuO) <sub>2</sub> Mg <sup>d</sup> | Et <sub>3</sub> N | 79%                | 91:9            | >20:1           |

<sup>a</sup>General conditions: **1a** (0.12 mmol), **2a** (0.10 mmol), NHC (0.02 mmol), base (0.12 mmol), DQ (0.20 mmol) and additive (0.01 mmol) in solvent (1.0 mL) at 30 °C for 24 h. Yields were determined by <sup>1</sup>H NMR. <sup>c</sup>THF (3 ml) was used. <sup>d</sup>MTB(0.20 mmol)was used, MTB = (*t*-BuO)<sub>2</sub>Mg. <sup>e</sup>At -5 °C. <sup>f</sup>e.r. was determined by chiral HPLC analysis of the purified products. <sup>g</sup>d.r. was determined by <sup>1</sup>H NMR analysis of the crude products.

**Table 2.** Condition optimization for the synthesis of **5**<sup>h</sup>
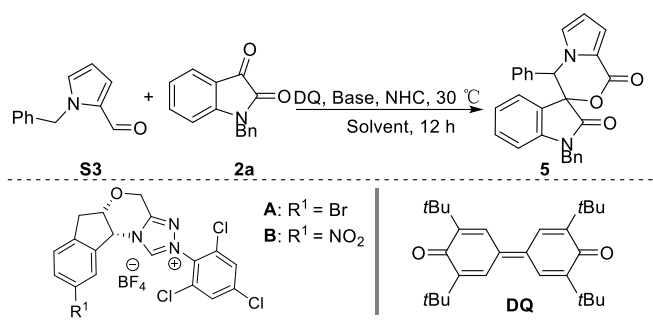

$\text{S3} + \text{2a} \xrightarrow[\text{Solvent, 12 h}]{\text{DQ, Base, NHC, 30 }^\circ\text{C}}$  **5**

**A:** R<sup>1</sup> = Br  
**B:** R<sup>1</sup> = NO<sub>2</sub>

**DQ**

| Entry | NHC      | Solvent     | Base                            | Yield% |
|-------|----------|-------------|---------------------------------|--------|
| 1     | <b>A</b> | THF         | DMAP                            | N.R.   |
| 2     | <b>A</b> | THF         | NaHCO <sub>3</sub>              | N.R.   |
| 3     | <b>A</b> | THF         | Na <sub>2</sub> CO <sub>3</sub> | N.R.   |
| 4     | <b>A</b> | THF         | Et <sub>3</sub> N               | N.R.   |
| 5     | <b>A</b> | 1,4-Dioxane | DMAP                            | N.R.   |
| 6     | <b>B</b> | THF         | DMAP                            | N.R.   |

<sup>h</sup>General conditions: **S3** (0.12 mmol), **2a** (0.10 mmol), NHC (0.02 mmol), base (0.12 mmol), DQ (0.20 mmol) in solvent (1.0 mL) at 30 °C for 12 h.

**Table 3.** Condition optimization for the synthesis of **7**<sup>i</sup>
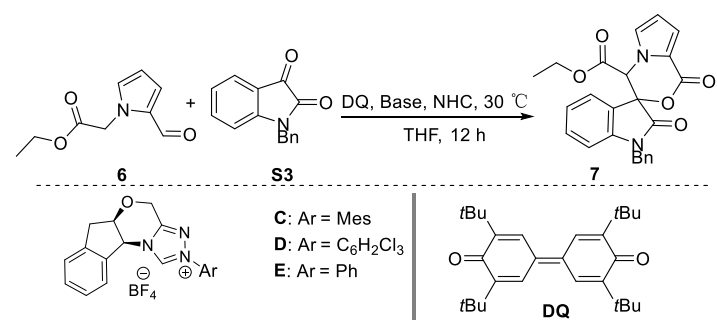

$\text{6} + \text{S3} \xrightarrow[\text{THF, 12 h}]{\text{DQ, Base, NHC, 30 }^\circ\text{C}}$  **7**

**C:** Ar = Mes  
**D:** Ar = C<sub>6</sub>H<sub>2</sub>Cl<sub>3</sub>  
**E:** Ar = Ph

**DQ**

| Entry | NHC      | Solvent | Base                           | Yield% |
|-------|----------|---------|--------------------------------|--------|
| 1     | <b>C</b> | THF     | Et <sub>3</sub> N              | N.R.   |
| 2     | <b>C</b> | THF     | K <sub>2</sub> CO <sub>3</sub> | N.R.   |
| 3     | <b>C</b> | THF     | DBU                            | N.R.   |
| 4     | <b>D</b> | THF     | Et <sub>3</sub> N              | N.R.   |
| 5     | <b>D</b> | THF     | K <sub>2</sub> CO <sub>3</sub> | N.R.   |
| 6     | <b>D</b> | THF     | DBU                            | N.R.   |
| 7     | <b>E</b> | THF     | Et <sub>3</sub> N              | N.R.   |
| 8     | <b>E</b> | THF     | K <sub>2</sub> CO <sub>3</sub> | N.R.   |
| 9     | <b>E</b> | THF     | DBU                            | N.R.   |

<sup>i</sup>General conditions: **6** (0.12 mmol), **S3** (0.10 mmol), NHC (0.02 mmol), base (0.12 mmol), DQ (0.20 mmol) in THF (1.0 mL) at 30 °C for 12 h.

#### 4 General procedures for the catalytic reactions

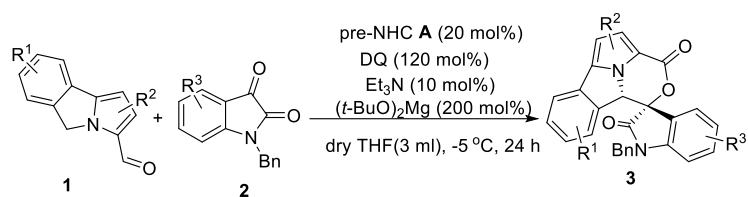

To a 4 mL vial equipped with a magnetic stir bar were added **1** (0.12 mmol), **2** (0.10 mmol), DQ (0.20 mmol), Et<sub>3</sub>N (0.01 mmol), *pre*-NHC A (0.02 mmol) and (t-BuO)<sub>2</sub>Mg (0.20 mmol) in dry THF (3.0 mL) and the reaction was stirred in ice bath at -5 °C for 24 h. Then the mixture was concentrated under reduced pressure. The resulting crude residue was purified by column chromatography on silica gel (petroleum ether/ethyl acetate = 100 / 1 to 10 / 1) to afford the desired product **3**.



## 5 Characterization of products

### (1*S*,9*bS*)-1'-benzylspiro[benzo[*a*][1,4]oxazino[3,4,5-*cd*]pyrrolizine-1,3'-indoline]-2',3'(9*bH*)-dione (**3a**)

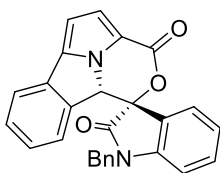

**3a**

The residue was purified by a silica gel flash chromatography (petroleum ether/ethyl acetate = 100/1 to 10/1) giving the product **3a** as a white solid in 79% yield (32.6 mg), m.p. 216–218 °C;  $[\alpha]^{25}_{\text{D}} = -140.590$  ( $c = 0.2$ ,  $\text{CHCl}_3$ ); > 20:1 dr; 91:9 er; determined by HPLC on a Chiralpak IF column at 254 nm

(n-hexane/2-propanol = 60/40, 0.7 mL/min),  $t_{\text{R}} = 48.80$  min (minor),  $t_{\text{R}} = 33.72$  min (major);

**<sup>1</sup>H NMR** (400 MHz,  $\text{CDCl}_3$ )  $\delta$  7.50 (d,  $J = 7.7$  Hz, 1H), 7.41 – 7.33 (m, 5H), 7.27 (s, 1H), 7.25 (d,  $J = 7.7$  Hz, 1H), 7.20 (d,  $J = 3.9$  Hz, 1H), 7.06 (td,  $J = 7.8, 1.1$  Hz, 1H), 6.95 (td,  $J = 7.6, 0.9$  Hz, 1H), 6.80 (d,  $J = 7.6$  Hz, 1H), 6.71 (d,  $J = 7.9$  Hz, 1H), 6.64 – 6.58 (m, 2H), 5.86 (s, 1H), 5.25 (d,  $J = 7.1$  Hz, 1H), 5.01 (dd,  $J = 44.6, 15.4$  Hz, 2H).

**<sup>13</sup>C NMR** (101 MHz,  $\text{CDCl}_3$ )  $\delta$  169.1, 157.0, 142.7, 142.7, 139.8, 134.9, 134.1, 131.1, 129.5, 129.0, 128.2, 127.8, 127.1, 124.2, 123.8, 123.5, 122.8, 121.0, 121.0, 115.4, 109.7, 105.0, 85.6, 59.6, 44.3.

**HRMS** (ESI,  $m/z$ ) Calcd. for  $\text{C}_{27}\text{H}_{19}\text{N}_2\text{O}_3^+$ ,  $[\text{M}+\text{H}]^+$ : 419.1390, found: 419.1387.

<Chromatogram>

mAU

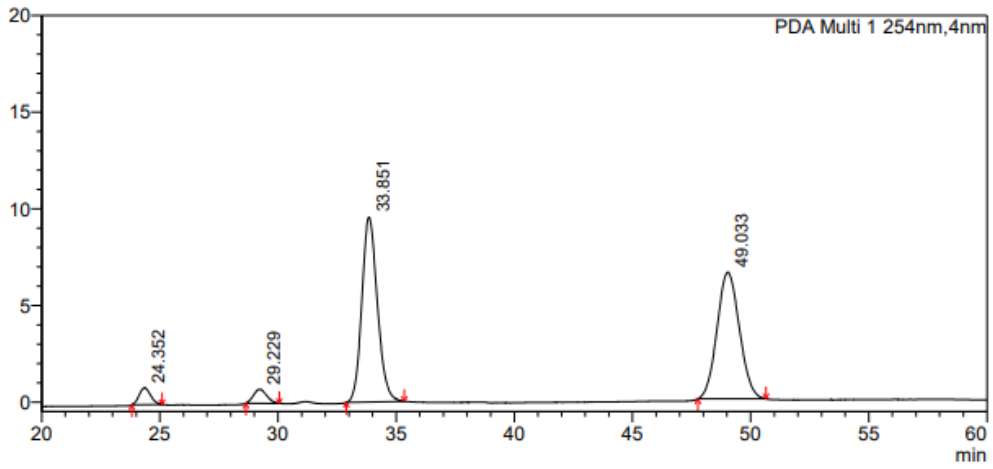

<Peak Table>

PDA Ch1 254nm

| Peak# | Ret. Time | Area   | Height | Area%   |
|-------|-----------|--------|--------|---------|
| 1     | 24.352    | 29055  | 870    | 3.136   |
| 2     | 29.229    | 27974  | 721    | 3.020   |
| 3     | 33.851    | 437669 | 9563   | 47.243  |
| 4     | 49.033    | 431728 | 6550   | 46.601  |
| Total |           | 926426 | 17704  | 100.000 |

<Chromatogram>

mAU

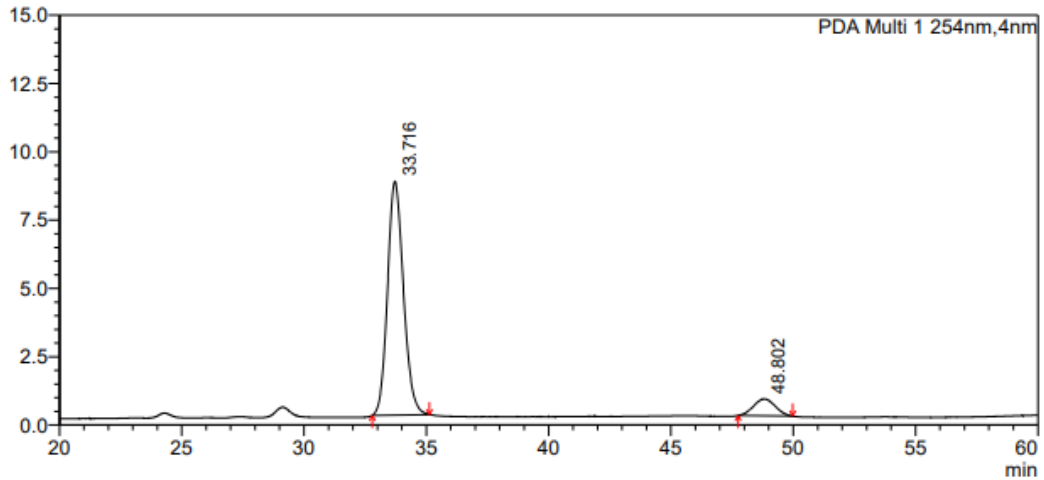

<Peak Table>

PDA Ch1 254nm

| Peak# | Ret. Time | Area   | Height | Area%   |
|-------|-----------|--------|--------|---------|
| 1     | 33.716    | 386967 | 8554   | 91.027  |
| 2     | 48.802    | 38147  | 618    | 8.973   |
| Total |           | 425115 | 9172   | 100.000 |

**(1*S*,9*bS*)-1'-benzyl-9-methylspiro[benzo[*a*][1,4]oxazino[3,4,5-*cd*]pyrrolizine-1,3'-indoline]-2',3(9*bH*)-dione (**3b**)**

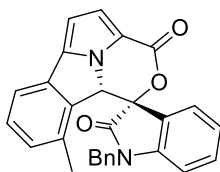

**3b**

The residue was purified by a silica gel flash chromatography (petroleum ether/ethyl acetate = 100/1 to 10/1) giving the product **3b** as a yellow solid in 80% yield (34.6 mg), m.p. 202-204 °C;  $[\alpha]^{25}_{\text{D}} = -228.722$  ( $c = 0.25$ ,  $\text{CHCl}_3$ ); 10:1 dr; 98:2 er; determined by HPLC on a Chiralpak IF column at 254 nm (n-hexane/2-propanol = 60/40, 0.7 mL/min),  $t_{\text{R}} = 34.30$  min (minor),  $t_{\text{R}} = 28.35$  min (major)

**$^1\text{H NMR}$**  (400 MHz,  $\text{CD}_2\text{Cl}_2$ )  $\delta$  7.35 – 7.20 (m, 6H), 7.14 (t,  $J = 7.6$  Hz, 1H), 7.09 (d,  $J = 3.9$  Hz, 1H), 7.04 (td,  $J = 7.8, 1.2$  Hz, 1H), 6.82 (d,  $J = 7.6$  Hz, 1H), 6.70 (d,  $J = 7.9$  Hz, 1H), 6.60 – 6.52 (m, 2H), 5.82 (s, 1H), 5.15 – 5.07 (m, 2H), 4.61 (d,  $J = 15.4$  Hz, 1H), 1.96 (s, 3H).

**$^{13}\text{C NMR}$**  (101 MHz,  $\text{CD}_2\text{Cl}_2$ )  $\delta$  169.7, 156.5, 143.1, 142.8, 138.9, 135.4, 134.5, 134.3, 131.2, 129.6, 129.3, 128.9, 128.1, 127.9, 124.1, 123.7, 122.9, 120.6, 118.4, 115.3, 110.1, 104.4, 86.0, 59.7, 44.4, 19.1

**HRMS** (ESI,  $m/z$ ) Calcd. for  $\text{C}_{28}\text{H}_{20}\text{N}_2\text{NaO}_3^+$ ,  $[\text{M}+\text{Na}]^+$ : 455.1366, found: 455.1349

**<Chromatogram>**

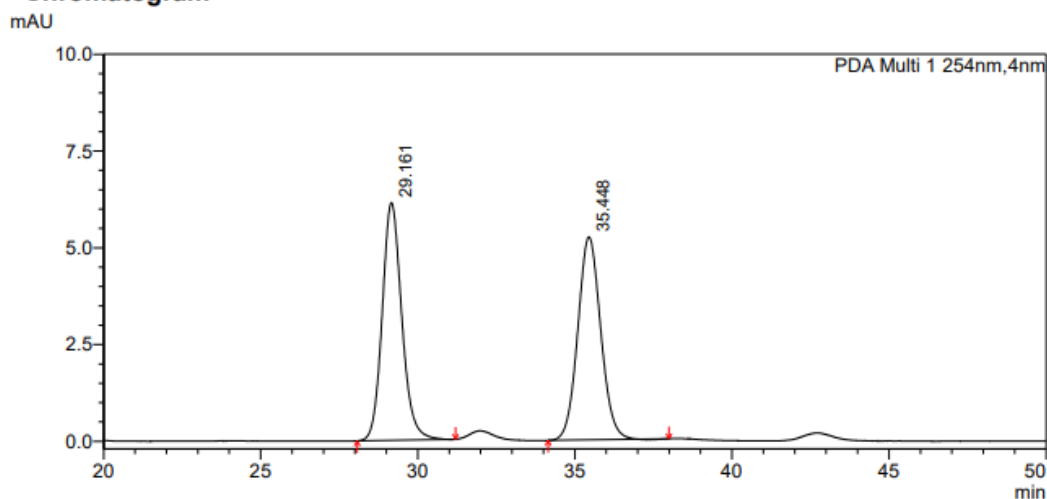

**<Peak Table>**

PDA Ch1 254nm

| Peak# | Ret. Time | Area   | Height | Area%   |
|-------|-----------|--------|--------|---------|
| 1     | 29.161    | 265777 | 6139   | 49.994  |
| 2     | 35.448    | 265846 | 5242   | 50.006  |
| Total |           | 531623 | 11381  | 100.000 |

### <Chromatogram>

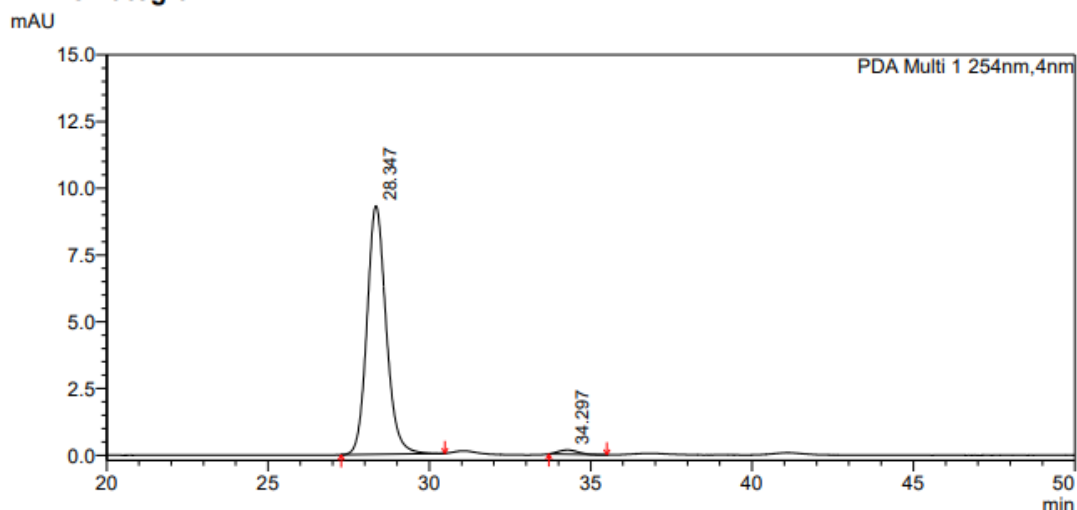

### <Peak Table>

PDA Ch1 254nm

| Peak# | Ret. Time | Area   | Height | Area%   |
|-------|-----------|--------|--------|---------|
| 1     | 28.347    | 384303 | 9314   | 98.345  |
| 2     | 34.297    | 6467   | 159    | 1.655   |
| Total |           | 390771 | 9473   | 100.000 |

### (1*S*,9*bS*)-1'-benzyl-9-bromospiro[benzo[*a*][1,4]oxazino[3,4,5-*cd*]pyrrolizine-1,3'-indoline]-2',3(9*bH*)-dione(**3c**)

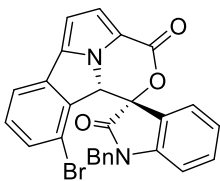

**3c**

The residue was purified by a silica gel flash chromatography (petroleum ether/ethyl acetate = 100/1 to 10/1) giving the product **3c** as a yellow solid in 64% yield (32.0 mg), m.p. 215–217 °C;  $[\alpha]^{25}_{\text{D}}$  = - 154.412 ( $c = 0.25$ ,  $\text{CHCl}_3$ );

10:1 dr; 98:2 er; determined by HPLC on a Chiralpak IF column at 254 nm ( $n$ -hexane/2-propanol = 60/40, 0.7 mL/min),  $t_{\text{R}} = 48.10$  min (minor),  $t_{\text{R}} = 35.96$  min (major)

**$^1\text{H NMR}$**  (400 MHz,  $\text{CD}_2\text{Cl}_2$ )  $\delta$  7.44 (dd,  $J = 6.9, 1.5$  Hz, 1H), 7.35 – 7.17 (m, 6H), 7.15 – 7.08 (m, 3H), 7.06 – 7.00 (m, 1H), 6.67 (d,  $J = 7.9$  Hz, 1H), 5.84 (s, 1H), 5.16 (dd,  $J = 15.6, 11.5$  Hz, 2H), 4.51 (d,  $J = 15.6$  Hz, 1H).

**$^{13}\text{C NMR}$**  (101 MHz,  $\text{CD}_2\text{Cl}_2$ )  $\delta$  169.4, 156.2, 143.2, 141.7, 140.5, 136.4, 134.7, 131.4, 131.3, 131.2, 128.9, 128.0, 127.8, 123.8, 123.4, 122.5, 120.6, 119.7, 118.3, 115.9, 110.1, 105.3, 85.7, 60.8, 44.6.

**HRMS** (ESI,  $m/z$ ) Calcd. for  $\text{C}_{27}\text{H}_{17}\text{BrN}_2\text{NaO}_3^+$ ,  $[\text{M}+\text{Na}]^+$ : 519.0315, found: 519.0310.

### <Chromatogram>

mAU

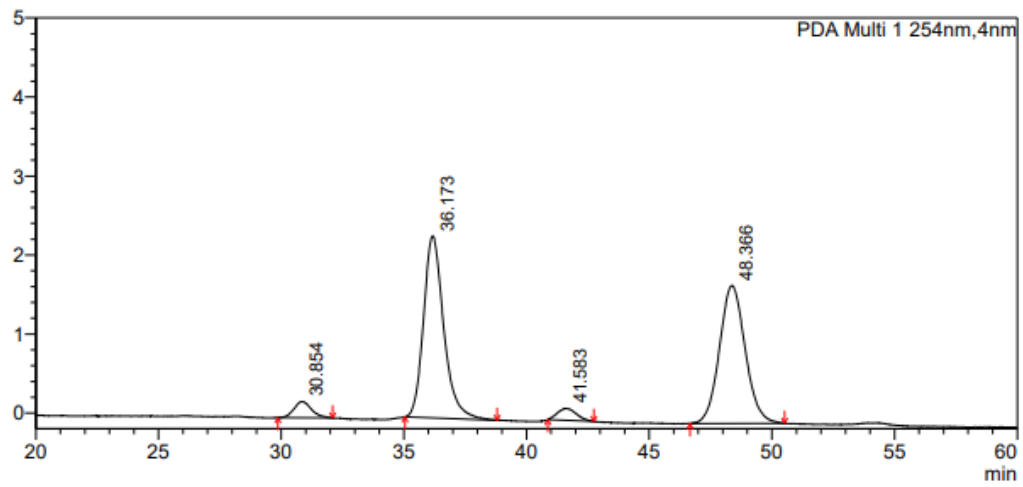

### <Peak Table>

PDA Ch1 254nm

| Peak# | Ret. Time | Area   | Height | Area%   |
|-------|-----------|--------|--------|---------|
| 1     | 30.854    | 10076  | 203    | 3.634   |
| 2     | 36.173    | 131773 | 2300   | 47.522  |
| 3     | 41.583    | 8079   | 149    | 2.914   |
| 4     | 48.366    | 127358 | 1742   | 45.930  |
| Total |           | 277287 | 4394   | 100.000 |

### <Chromatogram>

mAU

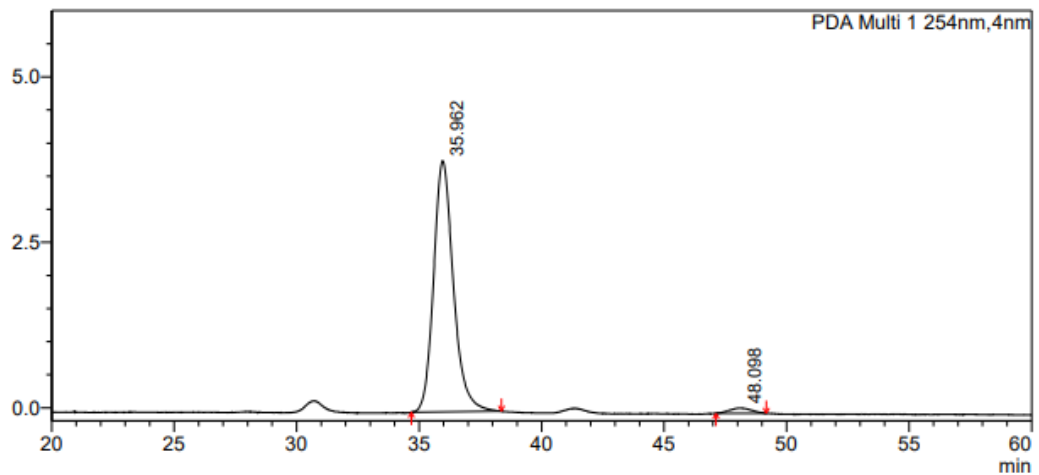

### <Peak Table>

PDA Ch1 254nm

| Peak# | Ret. Time | Area   | Height | Area%   |
|-------|-----------|--------|--------|---------|
| 1     | 35.962    | 213187 | 3793   | 97.767  |
| 2     | 48.098    | 4869   | 79     | 2.233   |
| Total |           | 218056 | 3872   | 100.000 |

**(1*S*,9*bS*)-1'-benzyl-5-iodospiro[benzo[*a*][1,4]oxazino[3,4,5-*cd*]pyrrolizine-1,3'-indoline]-2',3(9*bH*)-dione (3*d*)**

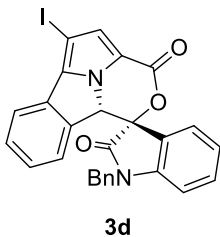

The residue was purified by a silica gel flash chromatography (petroleum ether/ethyl acetate = 100/1 to 10/1) giving the product **3d** as a orange solid in 37% yield (20.1 mg), m.p. 217–219 °C;  $[\alpha]_D^{25} = -101.698$  ( $c = 0.5$ ,  $\text{CHCl}_3$ ); 3:1 dr; 92:8 er; determined by HPLC on a Chiralpak IF column at 254 nm (n-hexane/2-propanol = 60/40, 0.7 mL/min),  $t_R = 36.92$  min (minor),  $t_R = 54.86$  min (major);

**$^1\text{H NMR}$**  (400 MHz,  $\text{CD}_2\text{Cl}_2$ )  $\delta$  7.48 – 7.43 (m, 1H), 7.35 – 7.27 (m, 4H), 7.19 (t,  $J = 7.6$  Hz, 1H), 7.09 (d,  $J = 3.9$  Hz, 1H), 7.02 (ddd,  $J = 7.8, 6.6, 1.2$  Hz, 1H), 6.89 (td,  $J = 7.6, 1.0$  Hz, 1H), 6.74 – 6.65 (m, 2H), 6.59 – 6.52 (m, 2H), 5.76 (d,  $J = 8.1$  Hz, 1H), 5.16 (m,  $J = 13.2, 6.6$  Hz, 1H), 4.92 (dd,  $J = 37.5, 15.5$  Hz, 2H).

**$^{13}\text{C NMR}$**  (101 MHz,  $\text{CDCl}_3$ )  $\delta$  169.2 157.0, 142.8, 142.7, 139.8, 134.9, 134.1, 131.1, 129.5, 129.0, 128.2, 127.8, 127.2, 124.2, 123.8, 123.5, 122.7, 121.0, 121.0, 115.4, 109.8, 105.1, 85.6, 59.6, 44.3.

**HRMS** (ESI,  $m/z$ ) Calcd. for  $\text{C}_{27}\text{H}_{17}\text{N}_2\text{IO}_3^+$ ,  $[\text{M}+\text{Na}]^+$ : 567.0176, found: 567.0104.

**<Chromatogram>**

mAU

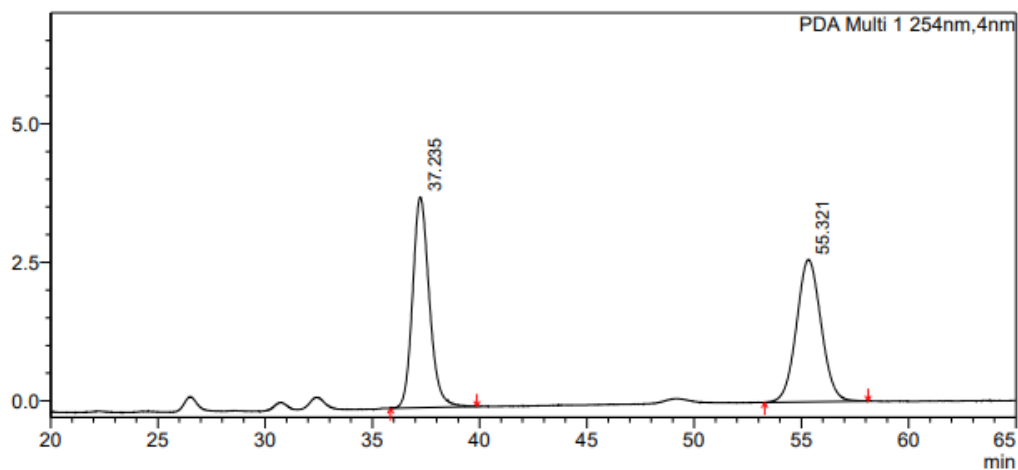

**<Peak Table>**

PDA Ch1 254nm

| Peak# | Ret. Time | Area   | Height | Area%   |
|-------|-----------|--------|--------|---------|
| 1     | 37.235    | 206132 | 3801   | 50.144  |
| 2     | 55.321    | 204945 | 2563   | 49.856  |
| Total |           | 411078 | 6364   | 100.000 |

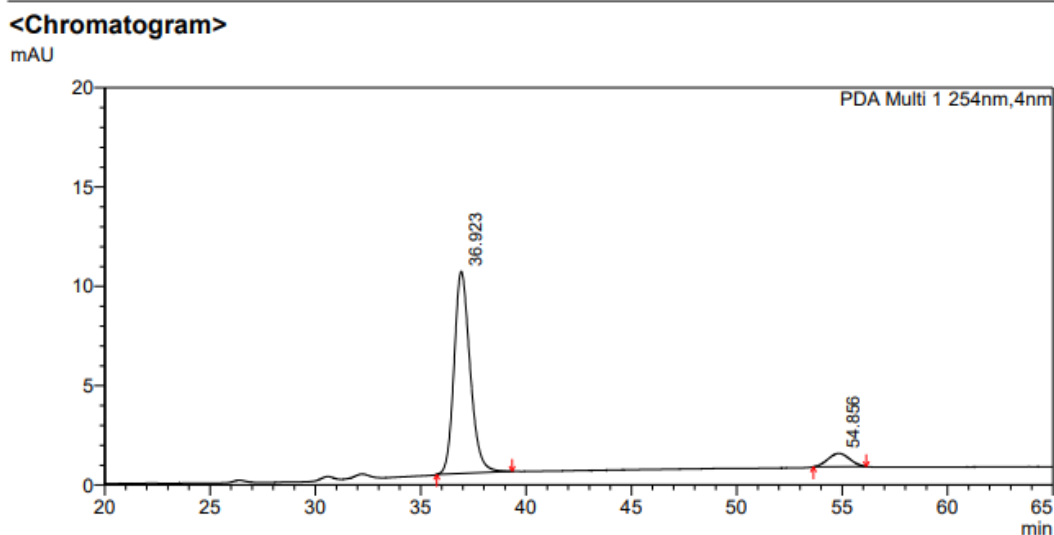

<Peak Table>

PDA Ch1 254nm

| Peak# | Ret. Time | Area   | Height | Area%   |
|-------|-----------|--------|--------|---------|
| 1     | 36.923    | 539755 | 10173  | 91.883  |
| 2     | 54.856    | 47685  | 667    | 8.117   |
| Total |           | 587440 | 10840  | 100.000 |

(1S,9bS)-1'-benzyl-7-methylspiro[benzo[a][1,4]oxazino[3,4,5-cd]pyrrolizine-1,3'-indoline]-2',3(9bH)-dione(3e)

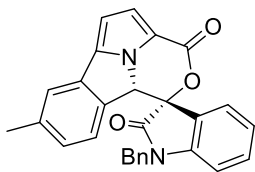

3e

The residue was purified by a silica gel flash chromatography (petroleum ether/ethyl acetate = 100/1 to 10/1) giving the product **3e** as a yellow solid in 89% yield (38.6 mg), m.p. 206-208 °C;  $[\alpha]^{25}_{\text{D}} = -94.234$  (c = 0.25, CHCl<sub>3</sub>); 10:1 dr; 85:15 er; determined by HPLC on a Chiralpak IF column

at 254 nm (n-hexane/2-propanol = 60/40, 0.7 mL/min),  $t_{\text{R}} = 53.44$  min (minor),  $t_{\text{R}} = 39.04$  min (major)

**<sup>1</sup>H NMR** (400 MHz, CD<sub>2</sub>Cl<sub>2</sub>)  $\delta$  7.47 – 7.36 (m, 6H), 7.21 (t,  $J = 6.7$  Hz, 1H), 7.14 (td,  $J = 7.8, 0.9$  Hz, 1H), 6.83 (t,  $J = 8.1$  Hz, 2H), 6.75 – 6.63 (m, 3H), 5.83 (s, 1H), 5.29 (d,  $J = 7.5$  Hz, 1H), 5.04 (dd,  $J = 49.8, 15.5$  Hz, 2H), 2.33 (s, 3H).

**<sup>13</sup>C NMR** (101 MHz, CD<sub>2</sub>Cl<sub>2</sub>)  $\delta$  169.1, 156.8, 142.9, 142.8, 139.9, 136.9, 135.2, 134.2, 131.0, 129.0, 128.2, 127.9, 127.8, 124.1, 123.6, 123.1, 122.9, 121.7, 120.6, 115.3, 109.8, 104.9, 85.5, 59.4, 44.2, 21.2.

**HRMS** (ESI, m/z) Calcd. for C<sub>28</sub>H<sub>20</sub>N<sub>2</sub>NaO<sub>3</sub><sup>+</sup>, [M+Na]<sup>+</sup>: 455.1366, found: 455.1359.

<Chromatogram>

mAU

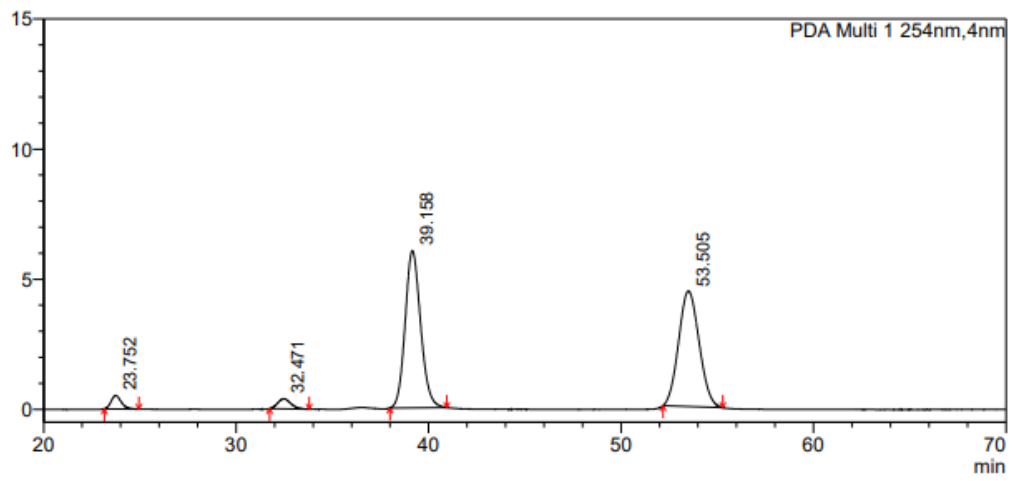

<Peak Table>

PDA Ch1 254nm

| Peak# | Ret. Time | Area   | Height | Area%   |
|-------|-----------|--------|--------|---------|
| 1     | 23.752    | 18916  | 516    | 2.682   |
| 2     | 32.471    | 18290  | 386    | 2.593   |
| 3     | 39.158    | 338363 | 6042   | 47.978  |
| 4     | 53.505    | 329676 | 4438   | 46.746  |
| Total |           | 705245 | 11382  | 100.000 |

<Chromatogram>

mAU

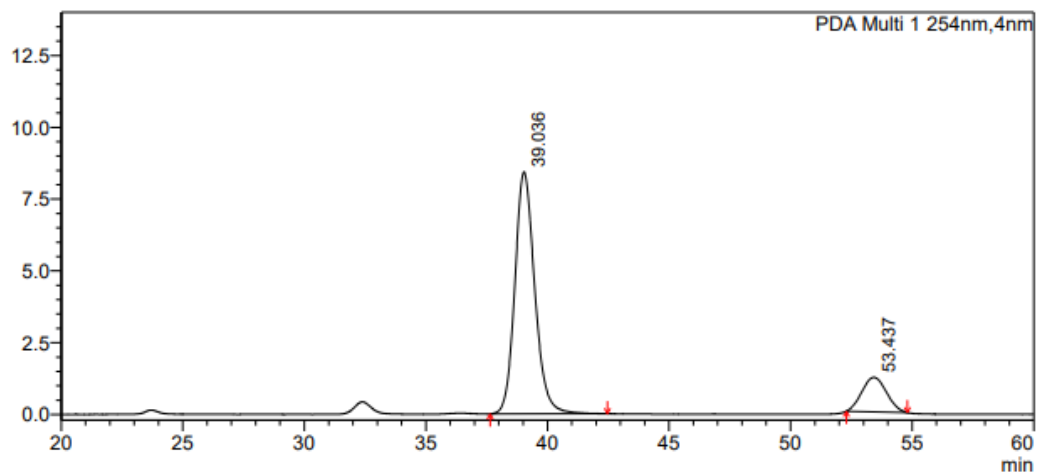

<Peak Table>

PDA Ch1 254nm

| Peak# | Ret. Time | Area   | Height | Area%   |
|-------|-----------|--------|--------|---------|
| 1     | 39.036    | 480395 | 8427   | 85.027  |
| 2     | 53.437    | 84599  | 1202   | 14.973  |
| Total |           | 564994 | 9629   | 100.000 |



**(1S,9bS)-1'-benzyl-7-(tert-butyl)spiro[benzo[a][1,4]oxazino[3,4,5-cd]pyrrolizine-1,3'-indoline]-2',3(9bH)-dione(3f)**

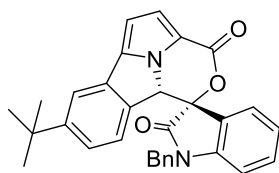

**3f**

The residue was purified by a silica gel flash chromatography (petroleum ether/ethyl acetate = 100/1 to 10/1) giving the product **3f** as a yellow solid in 49% yield (23.4 mg), m.p. 209-211 °C;  $[\alpha]^{25D} = -70.810$  (c = 0.5, CHCl<sub>3</sub>); 14:1 dr; 83:17 er; determined by HPLC on a Chiralpak IF column

at 254 nm (n-hexane/2-propanol = 70/30, 0.4 mL/min),  $t_R = 91.69$  min (minor),  $t_R = 72.48$  min (major)

**<sup>1</sup>H NMR** (400 MHz, CD<sub>2</sub>Cl<sub>2</sub>)  $\delta$  7.50 (d,  $J = 1.5$  Hz, 1H), 7.35 – 7.21 (m, 5H), 7.08 (d,  $J = 3.9$  Hz, 1H), 7.06 – 7.00 (m, 1H), 6.99 – 6.94 (m, 1H), 6.70 (dd,  $J = 12.6, 8.0$  Hz, 2H), 6.56 (dd,  $J = 12.8, 5.7$  Hz, 2H), 5.72 (s, 1H), 5.20 (d,  $J = 7.5$  Hz, 1H), 4.90 (dt,  $J = 17.7, 12.9$  Hz, 2H), 1.21 – 1.15 (m, 9H).

**<sup>13</sup>C NMR** (101 MHz, CD<sub>2</sub>Cl<sub>2</sub>)  $\delta$  169.2, 156.7, 153.2, 143.0, 142.9, 137.0, 135.2, 134.1, 131.0, 129.0, 128.1, 127.7, 124.3, 124.2, 123.7, 123.0, 123.0, 120.5, 118.3, 115.2, 109.8, 104.7, 85.5, 59.4, 44.2, 34.9, 31.0.

**HRMS** (ESI, m/z) Calcd. for C<sub>31</sub>H<sub>26</sub>N<sub>2</sub>NaO<sub>3</sub><sup>+</sup>, [M+Na]<sup>+</sup>: 497.1836, found: 497.1832.

**<Chromatogram>**

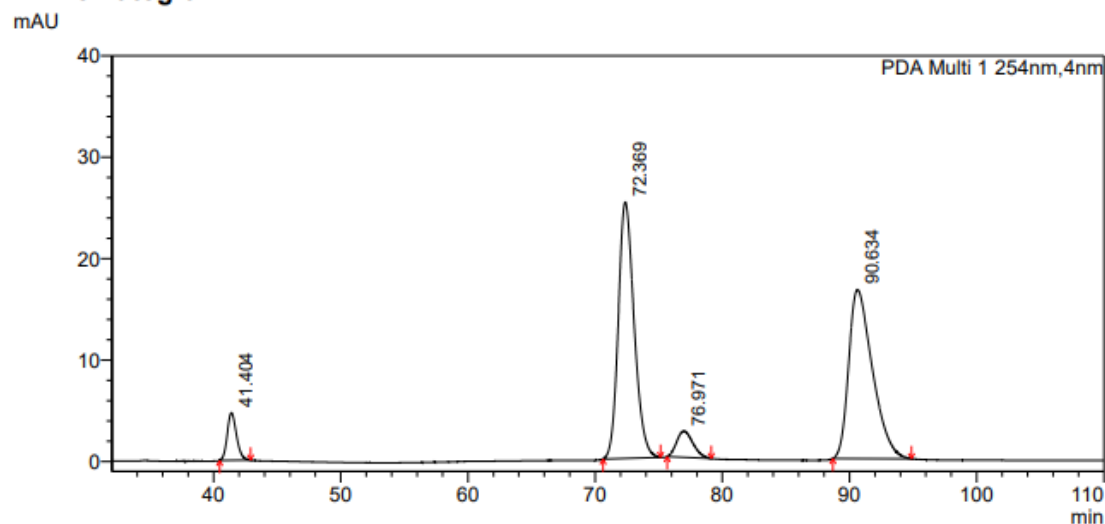

**<Peak Table>**

| PDA Ch1 254nm |           |         |        |         |
|---------------|-----------|---------|--------|---------|
| Peak#         | Ret. Time | Area    | Height | Area%   |
| 1             | 41.404    | 236883  | 4683   | 4.917   |
| 2             | 72.369    | 2181271 | 25275  | 45.279  |
| 3             | 76.971    | 230668  | 2577   | 4.788   |
| 4             | 90.634    | 2168552 | 16672  | 45.015  |
| Total         |           | 4817373 | 49208  | 100.000 |

### <Chromatogram>

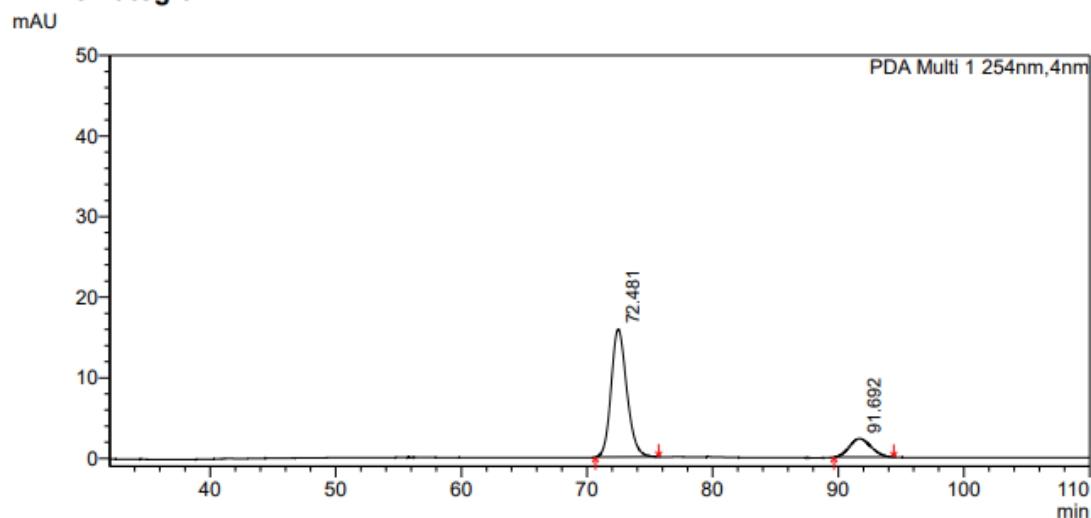

### <Peak Table>

PDA Ch1 254nm

| Peak# | Ret. Time | Area    | Height | Area%   |
|-------|-----------|---------|--------|---------|
| 1     | 72.481    | 1379417 | 15871  | 83.350  |
| 2     | 91.692    | 275557  | 2295   | 16.650  |
| Total |           | 1654974 | 18166  | 100.000 |

### (1S,9bS)-1'-benzyl-7-bromospiro[benzo[a][1,4]oxazino[3,4,5-cd]pyrrolizine-1,3'-indoline]-2',3'(9bH)-dione(3g)

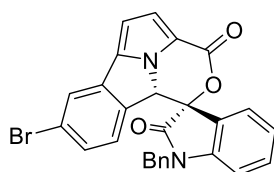

**3g**

The residue was purified by a silica gel flash chromatography (petroleum ether/ethyl acetate = 100/1 to 10/1) giving the product **3g** as a yellow solid in 35% yield (17.3 mg), m.p. 242-244 °C;  $[\alpha]^{25}_{\text{D}} = -27.724$  (c = 0.25, CHCl<sub>3</sub>); 10:1 dr; 96:4 er; determined by HPLC on a Chiralpak IF column

at 254 nm (n-hexane/2-propanol = 60/40, 0.7 mL/min),  $t_{\text{R}} = 52.87$  min (minor),  $t_{\text{R}} = 38.66$  min (major)

**<sup>1</sup>H NMR** (400 MHz, CD<sub>2</sub>Cl<sub>2</sub>)  $\delta$  7.57 (d,  $J = 1.7$  Hz, 1H), 7.35-7.29 (m, 5H), 7.09 (d,  $J = 3.9$  Hz, 1H), 7.06 (td,  $J = 7.8, 1.2$  Hz, 1H), 6.98 (dd,  $J = 8.1, 1.8$  Hz, 1H), 6.73 (d,  $J = 7.9$  Hz, 1H), 6.60 – 6.55 (m, 2H), 6.50 (d,  $J = 8.2$  Hz, 1H), 5.70 (s, 1H), 5.17 – 5.13 (m, 1H), 4.97 (d,  $J = 15.4$  Hz, 1H), 4.84 (d,  $J = 15.4$  Hz, 1H).

**<sup>13</sup>C NMR** (101 MHz, CD<sub>2</sub>Cl<sub>2</sub>)  $\delta$  168.9, 156.4, 142.6, 141.1, 138.6, 136.0, 135.2, 131.3, 129.8, 129.0, 128.3, 127.9, 124.7, 124.2, 124.0, 123.8, 123.6, 122.5, 120.7, 115.8, 109.9, 105.8, 85.2, 59.4, 44.3.

**HRMS** (ESI, m/z) Calcd. for C<sub>27</sub>H<sub>17</sub>BrN<sub>2</sub>NaO<sub>3</sub><sup>+</sup>, [M+Na]<sup>+</sup>: 519.0315, found: 519.0303.

### <Chromatogram>

mAU

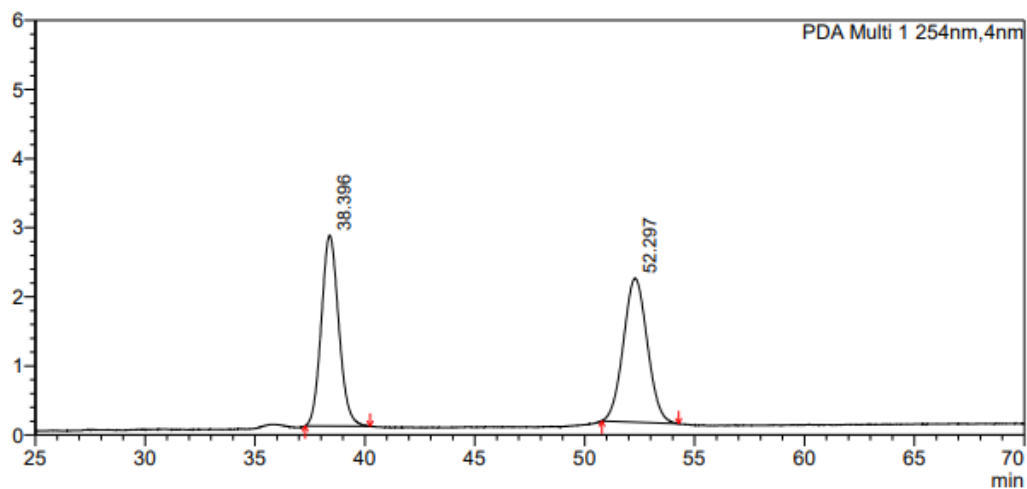

### <Peak Table>

PDA Ch1 254nm

| Peak# | Ret. Time | Area   | Height | Area%   |
|-------|-----------|--------|--------|---------|
| 1     | 38.396    | 152511 | 2761   | 49.124  |
| 2     | 52.297    | 157951 | 2082   | 50.876  |
| Total |           | 310462 | 4843   | 100.000 |

### <Chromatogram>

mAU

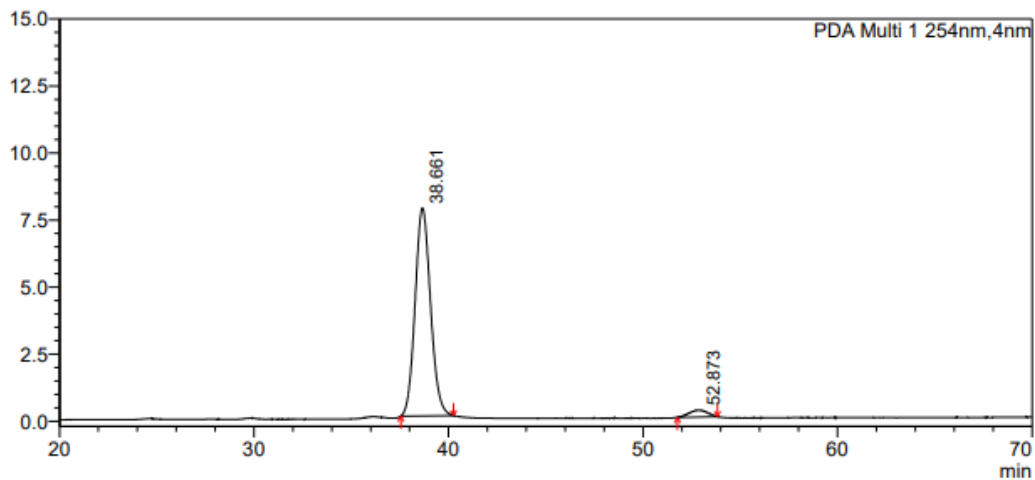

### <Peak Table>

PDA Ch1 254nm

| Peak# | Ret. Time | Area   | Height | Area%   |
|-------|-----------|--------|--------|---------|
| 1     | 38.661    | 428427 | 7753   | 96.243  |
| 2     | 52.873    | 16722  | 254    | 3.757   |
| Total |           | 445149 | 8007   | 100.000 |

**(1S,9bS)-1'-benzyl-5'-methylspiro[benzo[a][1,4]oxazino[3,4,5-cd]pyrrolizine-1,3'-indoline]-2',3(9bH)-dione(3h)**

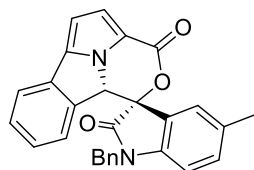

**3h**

The residue was purified by a silica gel flash chromatography (petroleum ether/ethyl acetate = 100/1 to 10/1) giving the product **3h** as a yellow solid in 93% yield (40.3 mg), m.p. 115-117 °C;  $[\alpha]^{25}_{\text{D}} = -140.217$  ( $c = 0.5$ ,  $\text{CHCl}_3$ ); >20:1 dr; 92:8 er; determined by HPLC on a Chiralpak IF column

at 254 nm (n-hexane/2-propanol = 60/40, 0.7 mL/min),  $t_{\text{R}} = 49.43$  min (minor),  $t_{\text{R}} = 32.33$  min (major)

**<sup>1</sup>H NMR** (400 MHz,  $\text{CD}_2\text{Cl}_2$ )  $\delta$  7.58 (d,  $J = 7.7$  Hz, 1H), 7.48 – 7.36 (m, 5H), 7.32 (t,  $J = 7.6$  Hz, 1H), 7.22 (d,  $J = 3.9$  Hz, 1H), 7.02 (t,  $J = 7.6$  Hz, 1H), 6.94 (d,  $J = 8.0$  Hz, 1H), 6.84 (d,  $J = 7.6$  Hz, 1H), 6.74 – 6.65 (m, 2H), 5.85 (s, 1H), 5.02 (dd,  $J = 45.2, 15.5$  Hz, 3H), 1.94 (d,  $J = 19.8$  Hz, 3H).

**<sup>13</sup>C NMR** (101 MHz,  $\text{CD}_2\text{Cl}_2$ )  $\delta$  169.1, 156.8, 142.7, 140.3, 139.9, 135.3, 134.2, 133.5, 131.2, 129.4, 128.9, 128.1, 127.8, 127.1, 124.9, 123.5, 122.8, 121.0, 120.6, 115.4, 109.5, 104.9, 85.7, 59.6, 44.2, 20.5.

**HRMS** (ESI,  $m/z$ ) Calcd. for  $\text{C}_{28}\text{H}_{20}\text{N}_2\text{NaO}_3^+$ ,  $[\text{M}+\text{Na}]^+$ : 455.1366, found: 455.1362.

**<Chromatogram>**

mAU

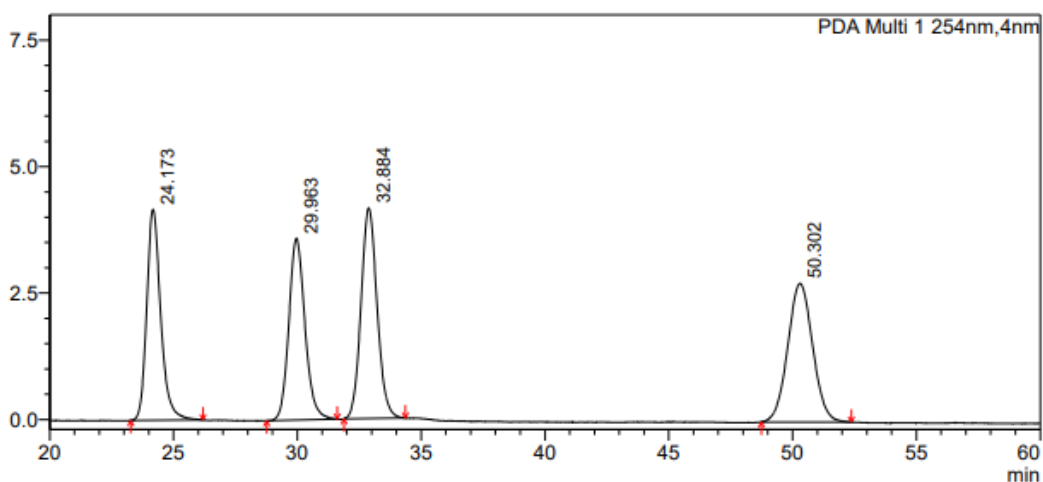

**<Peak Table>**

PDA Ch1 254nm

| Peak# | Ret. Time | Area   | Height | Area%   |
|-------|-----------|--------|--------|---------|
| 1     | 24.173    | 164001 | 4171   | 23.219  |
| 2     | 29.963    | 162923 | 3593   | 23.067  |
| 3     | 32.884    | 187659 | 4162   | 26.569  |
| 4     | 50.302    | 191729 | 2742   | 27.145  |
| Total |           | 706312 | 14668  | 100.000 |

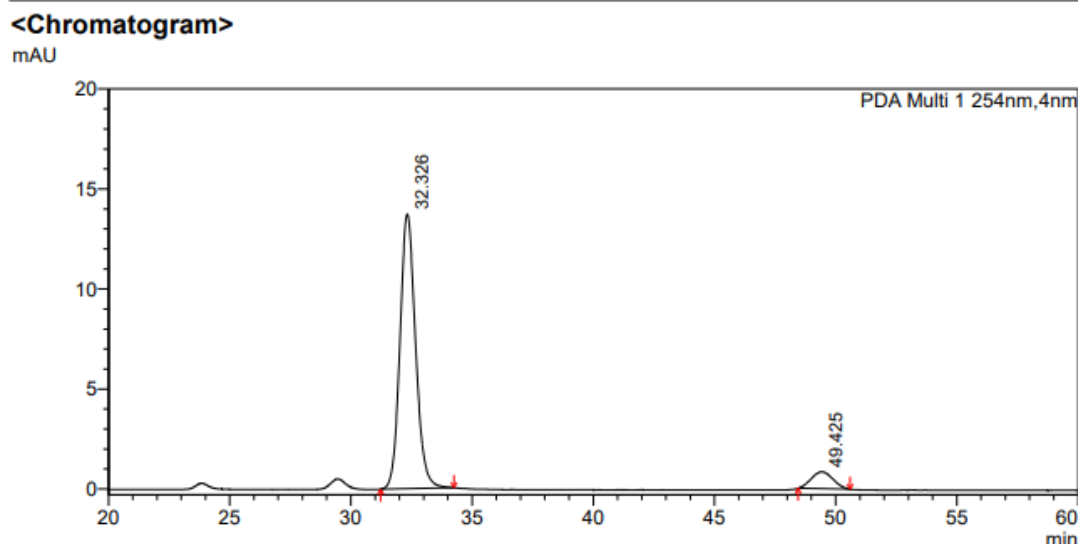

<Peak Table>

PDA Ch1 254nm

| Peak# | Ret. Time | Area   | Height | Area%   |
|-------|-----------|--------|--------|---------|
| 1     | 32.326    | 614278 | 13730  | 92.169  |
| 2     | 49.425    | 52194  | 838    | 7.831   |
| Total |           | 666472 | 14568  | 100.000 |

(1*S*,9*bS*)-1'-benzyl-5'-methoxyspiro[benzo[*a*][1,4]oxazino[3,4,5-*cd*]pyrrolizine-1,3'-indoline]-2',3(9*bH*)-dione(**3i**)

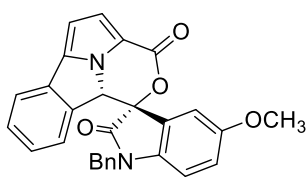

**3i**

The residue was purified by a silica gel flash chromatography (petroleum ether/ethyl acetate = 100/1 to 10/1) giving the product **3i** as a white solid in 96% yield (43.4 mg), m.p. 128-130 °C;  $[\alpha]^{25}_{\text{D}} = -119.161$  ( $c = 0.25$ ,  $\text{CHCl}_3$ ); 4:1 dr; 88:12 er; determined by HPLC on a

Chiralpak IF column at 254 nm (n-hexane/2-propanol = 60/40, 0.7 mL/min),  $t_{\text{R}} = 54.03$  min (minor),  $t_{\text{R}} = 44.11$  min(major);

**<sup>1</sup>H NMR** (400 MHz,  $\text{CD}_2\text{Cl}_2$ )  $\delta$  7.59 (d,  $J = 7.7$  Hz, 1H), 7.48 – 7.38 (m, 5H), 7.34 (t,  $J = 7.6$  Hz, 1H), 7.23 (d,  $J = 3.9$  Hz, 1H), 7.04 (t,  $J = 7.6$  Hz, 1H), 6.87 (d,  $J = 7.6$  Hz, 1H), 6.73 – 6.61 (m, 3H), 5.87 (s, 1H), 5.14 – 4.92 (m, 2H), 4.84 (d,  $J = 2.4$  Hz, 1H), 3.45 (s, 3H).

**<sup>13</sup>C NMR** (101 MHz,  $\text{CDCl}_3$ )  $\delta$  168.8, 156.9, 156.3, 143.0, 139.9, 135.8, 134.9, 134.1, 129.6, 129.0, 128.2, 127.7, 127.2, 123.7, 123.6, 121.0, 120.9, 115.8, 115.6, 110.9, 110.4, 104.9, 85.8, 59.6, 55.5, 44.4.

**HRMS** (ESI, m/z) Calcd. for  $\text{C}_{28}\text{H}_{20}\text{N}_2\text{NaO}_4^+$ ,  $[\text{M}+\text{Na}]^+$ : 471.1315, found: 471.1303.

### <Chromatogram>

mAU

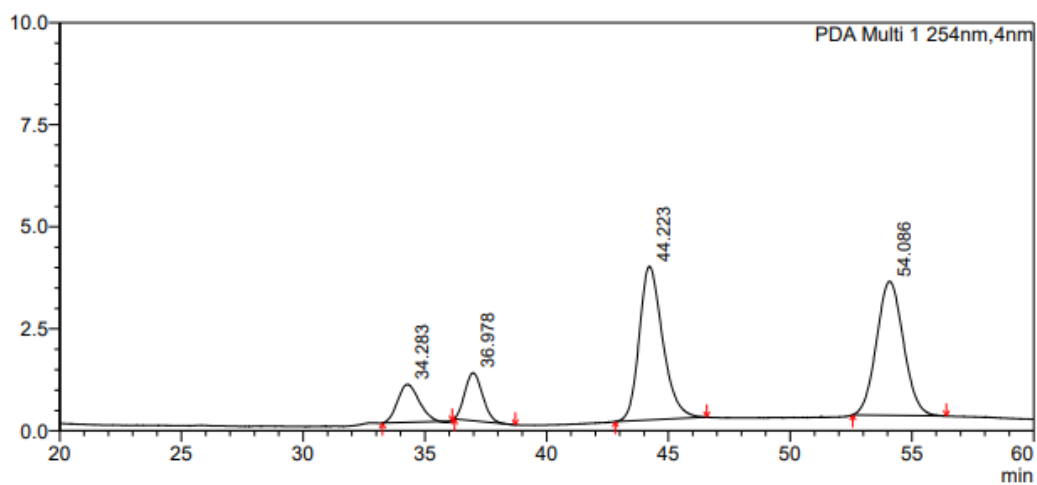

### <Peak Table>

PDA Ch1 254nm

| Peak# | Ret. Time | Area   | Height | Area%   |
|-------|-----------|--------|--------|---------|
| 1     | 34.283    | 56199  | 923    | 9.048   |
| 2     | 36.978    | 59452  | 1172   | 9.571   |
| 3     | 44.223    | 252745 | 3761   | 40.691  |
| 4     | 54.086    | 252741 | 3283   | 40.690  |
| Total |           | 621137 | 9140   | 100.000 |

### <Chromatogram>

mAU

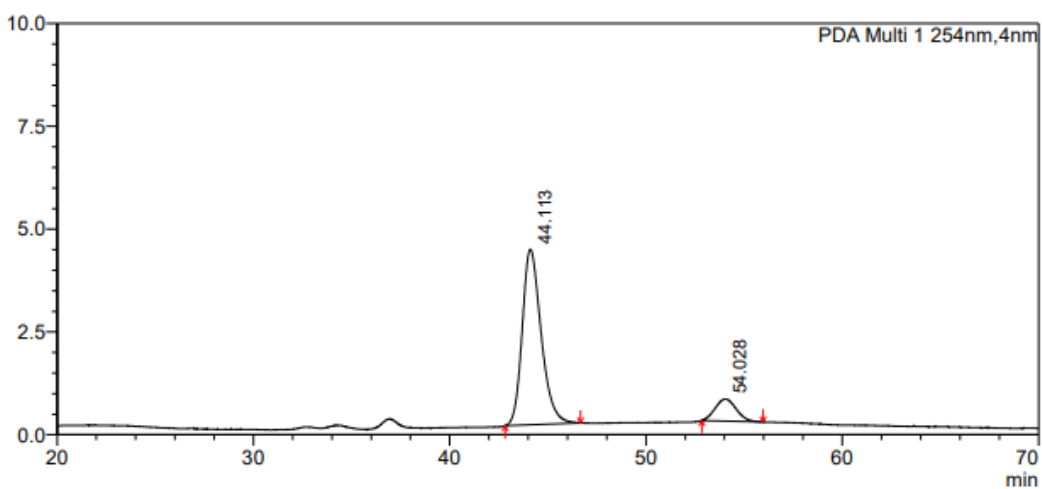

### <Peak Table>

PDA Ch1 254nm

| Peak# | Ret. Time | Area   | Height | Area%   |
|-------|-----------|--------|--------|---------|
| 1     | 44.113    | 286105 | 4267   | 87.735  |
| 2     | 54.028    | 39997  | 538    | 12.265  |
| Total |           | 326102 | 4805   | 100.000 |

**(1S,9bS)-1'-benzyl-5'-chlorospiro[benzo[a][1,4]oxazino[3,4,5-cd]pyrrolizine-1,3'-indoline]-2',3(9bH)-dione(3j)**

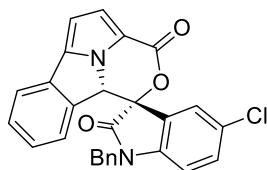

**3j**

The residue was purified by a silica gel flash chromatography (petroleum ether/ethyl acetate = 100/1 to 10/1) giving the product **3j** as a yellow solid in 68% yield (34.0 mg), m.p. 225-227 °C;  $[\alpha]^{25}_{\text{D}} = -108.215$  ( $c = 0.2$ ,  $\text{CHCl}_3$ ); 7:1 dr; 85:15 er; determined by HPLC on a Chiralpak IF column

at 254 nm (n-hexane/2-propanol = 70/30, 0.4 mL/min),  $t_{\text{R}} = 64.27$  min(minor),  $t_{\text{R}} = 50.87$  min(major);

**$^1\text{H NMR}$**  (400 MHz,  $\text{CD}_2\text{Cl}_2$ )  $\delta$  7.61 (d,  $J = 7.7$  Hz, 1H), 7.47 – 7.38 (m, 5H), 7.36 (dd,  $J = 13.1$ , 5.5 Hz, 1H), 7.24 (d,  $J = 3.9$  Hz, 1H), 7.11 (dd,  $J = 8.4$ , 2.1 Hz, 1H), 7.04 (td,  $J = 7.6$ , 0.8 Hz, 1H), 6.84 (d,  $J = 7.6$  Hz, 1H), 6.73 (dd,  $J = 10.2$ , 6.2 Hz, 2H), 5.85 (s, 1H), 5.19 (d,  $J = 2.1$  Hz, 1H), 5.03 (dd,  $J = 44.5$ , 15.5 Hz, 2H).

**$^{13}\text{C NMR}$**  (101 MHz,  $\text{CD}_2\text{Cl}_2$ )  $\delta$  168.7, 156.2, 142.9, 141.4, 139.4, 134.7, 134.0, 130.9, 129.7, 129.0, 128.9, 128.3, 127.8, 127.3, 124.6, 124.4, 123.5, 121.2, 121.0, 115.1, 110.9, 105.2, 85.2, 59.5, 44.4.

**HRMS** (ESI,  $m/z$ ) Calcd. for  $\text{C}_{27}\text{H}_{17}\text{ClN}_2\text{NaO}_3^+$ ,  $[\text{M}+\text{Na}]^+$ : 475.0820, found: 475.0817

**<Chromatogram>**

mAU

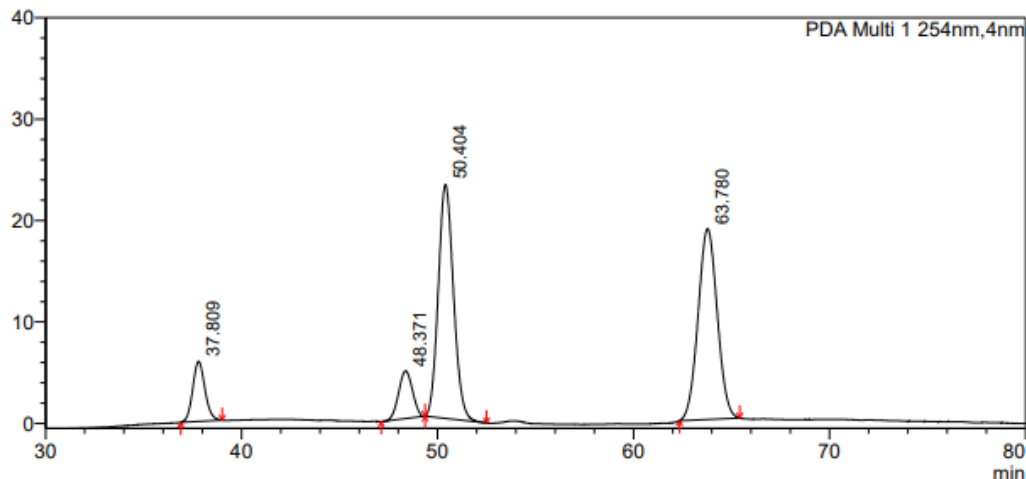

**<Peak Table>**

PDA Ch1 254nm

| Peak# | Ret. Time | Area    | Height | Area%   |
|-------|-----------|---------|--------|---------|
| 1     | 37.809    | 257203  | 5910   | 8.538   |
| 2     | 48.371    | 229942  | 4692   | 7.633   |
| 3     | 50.404    | 1246006 | 23070  | 41.360  |
| 4     | 63.780    | 1279464 | 18815  | 42.470  |
| Total |           | 3012615 | 52486  | 100.000 |

### <Chromatogram>

mAU

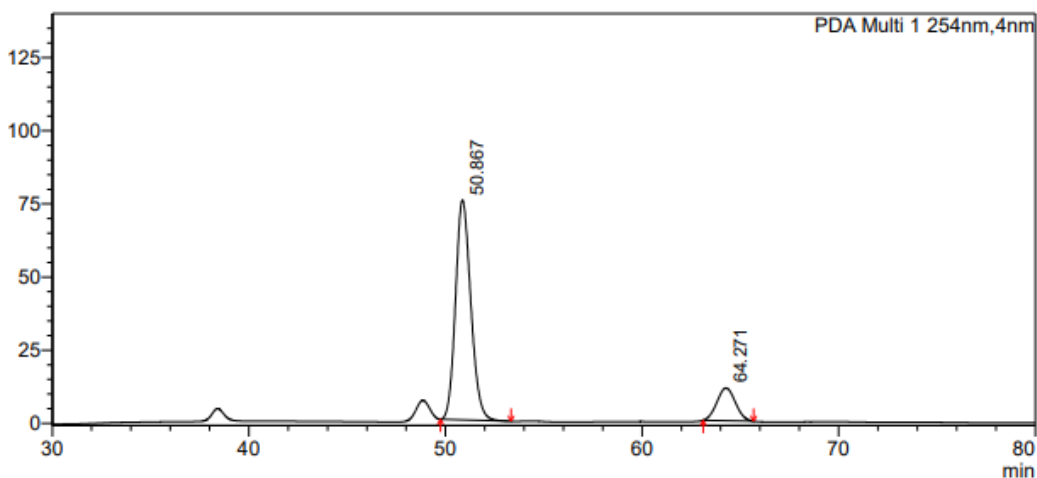

### <Peak Table>

PDA Ch1 254nm

| Peak# | Ret. Time | Area    | Height | Area%   |
|-------|-----------|---------|--------|---------|
| 1     | 50.867    | 4070128 | 75210  | 84.764  |
| 2     | 64.271    | 731583  | 11175  | 15.236  |
| Total |           | 4801711 | 86385  | 100.000 |

(1*S*,9*bS*)-1'-benzyl-5'-bromospiro[benzo[*a*][1,4]oxazino[3,4,5-*cd*]pyrrolizine-1,3'-indoline]-2',3'(9*bH*)-dione(**3k**)

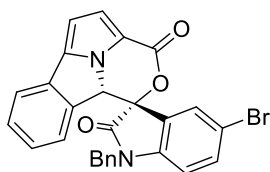

**3k**

The residue was purified by a silica gel flash chromatography (petroleum ether/ethyl acetate = 100/1 to 10/1) giving the product **3k** as a yellow solid in 71% yield (35.2 mg), m.p. 206-208 °C;  $[\alpha]^{25}_{\text{D}} = -32.239$  ( $c = 0.2$ ,  $\text{CHCl}_3$ ); 6:1 dr; 90:10 er; determined by HPLC on a Chiralpak IF column

at 254 nm (n-hexane/2-propanol = 60/40, 0.4 mL/min),  $t_{\text{R}} = 66.01$  min (minor),  $t_{\text{R}} = 49.45$  min (major);

**<sup>1</sup>H NMR** (400 MHz,  $\text{CD}_2\text{Cl}_2$ )  $\delta$  7.61 (d,  $J = 7.7$  Hz, 1H), 7.48 – 7.38 (m, 5H), 7.35 (t,  $J = 7.6$  Hz, 1H), 7.29 – 7.22 (m, 2H), 7.04 (dd,  $J = 8.3, 7.6$  Hz, 1H), 6.84 (d,  $J = 7.6$  Hz, 1H), 6.74 – 6.67 (m, 2H), 5.84 (s, 1H), 5.31 (d,  $J = 1.9$  Hz, 1H), 5.03 (dd,  $J = 45.6, 15.5$  Hz, 2H).

**<sup>13</sup>C NMR** (101 MHz,  $\text{CD}_2\text{Cl}_2$ )  $\delta$  168.6, 156.2, 143.0, 141.8, 139.4, 134.7, 134.0, 133.9, 129.7, 129.0, 128.3, 127.8, 127.4, 127.3, 124.8, 123.5, 121.2, 121.0, 116.2, 115.1, 111.4, 105.1, 85.2, 59.5, 44.4.

**HRMS** (ESI,  $m/z$ ) Calcd. for  $\text{C}_{27}\text{H}_{17}\text{BrN}_2\text{NaO}_3^+$ ,  $[\text{M}+\text{Na}]^+$ : 519.0315; found: 519.0308.



### <Chromatogram>

mAU

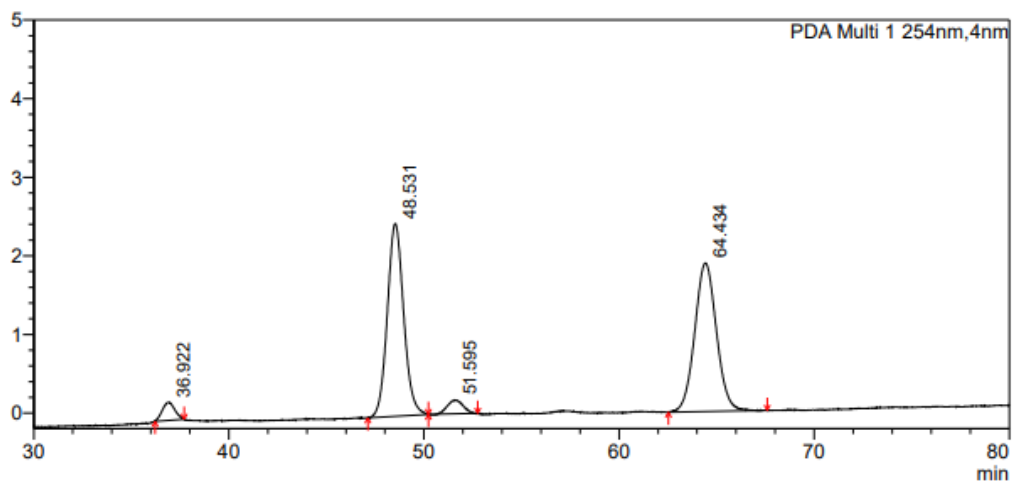

### <Peak Table>

PDA Ch1 254nm

| Peak# | Ret. Time | Area   | Height | Area%   |
|-------|-----------|--------|--------|---------|
| 1     | 36.922    | 10164  | 228    | 3.293   |
| 2     | 48.531    | 142732 | 2452   | 46.247  |
| 3     | 51.595    | 9767   | 177    | 3.165   |
| 4     | 64.434    | 145966 | 1887   | 47.295  |
| Total |           | 308630 | 4744   | 100.000 |

### <Chromatogram>

mAU

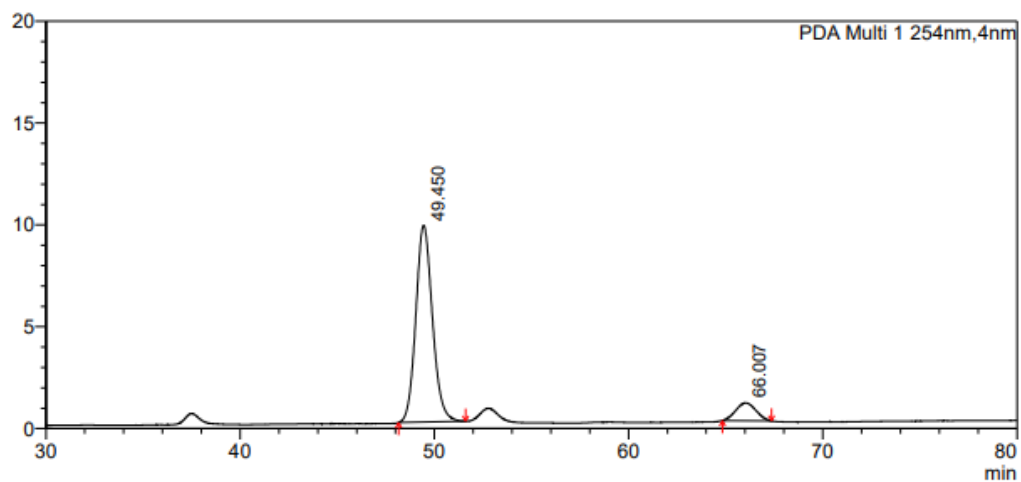

### <Peak Table>

PDA Ch1 254nm

| Peak# | Ret. Time | Area   | Height | Area%   |
|-------|-----------|--------|--------|---------|
| 1     | 49.450    | 576568 | 9668   | 90.104  |
| 2     | 66.007    | 63325  | 873    | 9.896   |
| Total |           | 639893 | 10541  | 100.000 |

**(1S,9bS)-1'-benzyl-5'-fluorospiro[benzo[a][1,4]oxazino[3,4,5-cd]pyrrolizine-1,3'-indoline]-  
2',3(9bH)-dione(3I)**

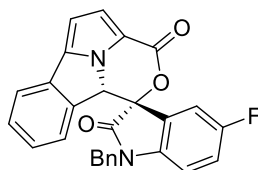

**3I**

The residue was purified by a silica gel flash chromatography (petroleum ether/ethyl acetate = 100/1 to 10/1) giving the product **3I** as a yellow solid in 66% yield (28.7 mg), m.p. 230-232 °C;  $[\alpha]_D^{25} = 64.911$  ( $c = 0.25$ ,  $\text{CHCl}_3$ ); 9:1 dr; 84:16 er; determined by HPLC on a Chiralpak IF column at 254 nm (n-hexane/2-propanol = 60/40, 0.7 mL/min),  $t_R = 49.44$  min

(minor),  $t_R = 36.05$  min(major);

**$^1\text{H NMR}$**  (400 MHz,  $\text{CD}_2\text{Cl}_2$ )  $\delta$  7.59 (t,  $J = 6.5$  Hz, 1H), 7.47 – 7.38 (m, 5H), 7.35 (t,  $J = 7.6$  Hz, 1H), 7.23 (d,  $J = 3.9$  Hz, 1H), 7.04 (td,  $J = 7.6, 1.0$  Hz, 1H), 6.90 – 6.80 (m, 2H), 6.77 – 6.69 (m, 2H), 5.87 (s, 1H), 5.12 – 4.94 (m, 3H).

**$^{13}\text{C NMR}$**  (101 MHz,  $\text{CD}_2\text{Cl}_2$ )  $\delta$  169.4, 164.3 (d,  $J = 250.5$  Hz), 156.4, 144.7 (d,  $J = 12.1$  Hz), 142.8, 139.7, 134.7, 134.1, 129.1, 128.4 (d,  $J = 240.4$  Hz), 127.8, 127.2, 125.8 (d,  $J = 10.1$  Hz), 123.5, 121.0, 120.8, 118.5 (d,  $J = 3.0$  Hz), 115.24, 109.8 (d,  $J = 22.2$  Hz), 105.1, 99.0, 98.7, 85.0, 59.6, 44.5.

**$^{19}\text{F NMR}$**  (377 MHz,  $\text{CD}_2\text{Cl}_2$ )  $\delta$  -107.14.

**HRMS** (ESI, m/z) Calcd. for  $\text{C}_{27}\text{H}_{17}\text{FN}_2\text{NaO}_3^+$ ,  $[\text{M}+\text{Na}]^+$ : 459.1115, found: 459.1108.

<Chromatogram>

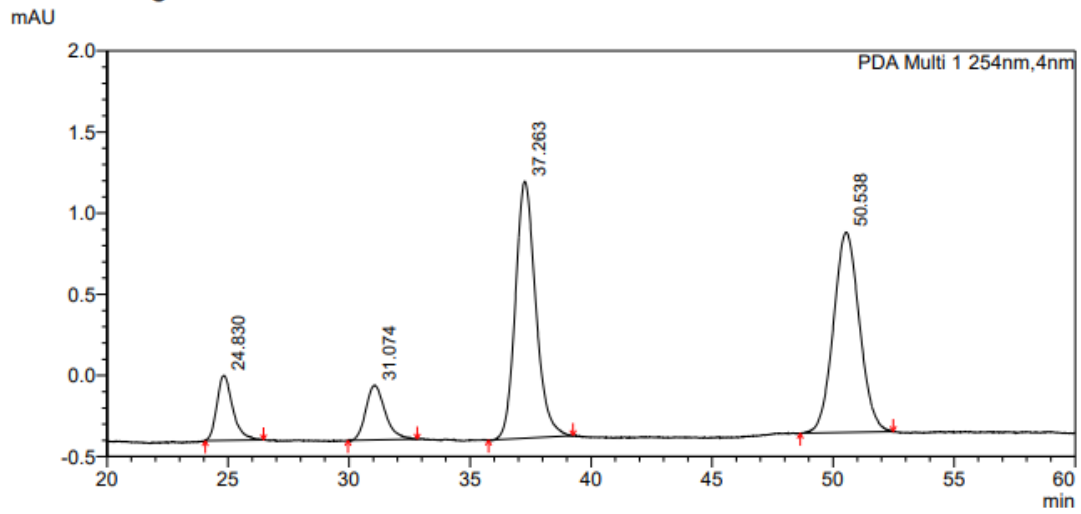

<Peak Table>

PDA Ch1 254nm

| Peak# | Ret. Time | Area   | Height | Area%   |
|-------|-----------|--------|--------|---------|
| 1     | 24.830    | 18270  | 399    | 8.251   |
| 2     | 31.074    | 18565  | 336    | 8.384   |
| 3     | 37.263    | 92469  | 1583   | 41.761  |
| 4     | 50.538    | 92119  | 1234   | 41.603  |
| Total |           | 221423 | 3552   | 100.000 |

<Chromatogram>

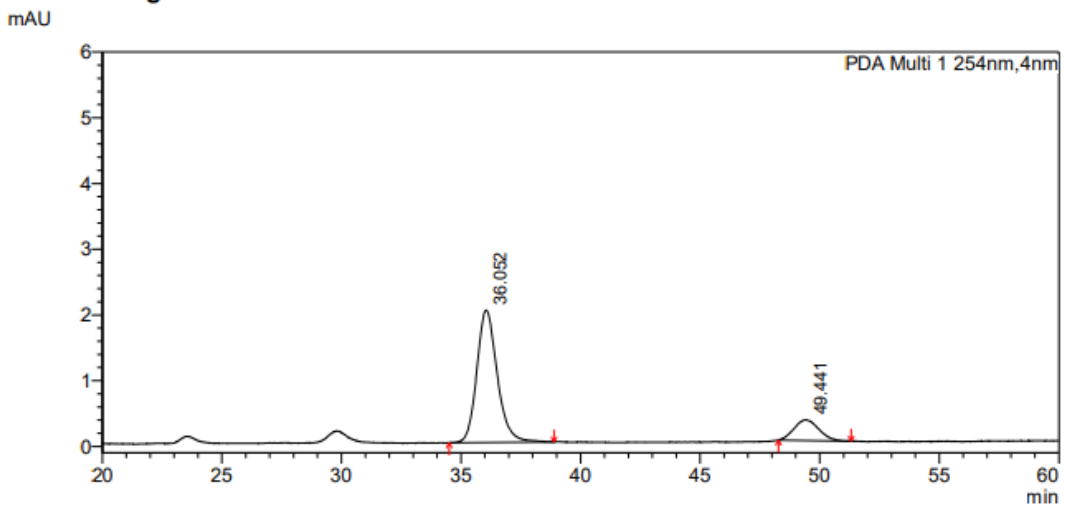

<Peak Table>

PDA Ch1 254nm

| Peak# | Ret. Time | Area   | Height | Area%   |
|-------|-----------|--------|--------|---------|
| 1     | 36.052    | 119733 | 2011   | 84.057  |
| 2     | 49.441    | 22709  | 314    | 15.943  |
| Total |           | 142442 | 2325   | 100.000 |

**(1*S*,9*bS*)-1'-benzyl-5'-iodospiro[benzo[*a*][1,4]oxazino[3,4,5-*cd*]pyrrolizine-1,3'-indoline]-  
2',3(9*bH*)-dione(**3m**)**

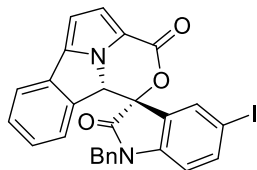

**3m**

The residue was purified by a silica gel flash chromatography (petroleum ether/ethyl acetate = 100/1 to 10/1) giving the product **3m** as a white solid in 58% yield (31.6 mg), m.p. 180–182 °C;  $[\alpha]^{25}_{\text{D}} = -175.209$  ( $c = 0.25$ ,  $\text{CHCl}_3$ ); 5:1 dr; 82:18 er; determined by HPLC on a Chiralpak IF column at 254 nm

(*n*-hexane/2-propanol = 60/40, 0.7 mL/min),  $t_{\text{R}} = 40.15$  min (minor),  $t_{\text{R}} = 29.07$  min (major);

**<sup>1</sup>H NMR** (400 MHz,  $\text{CD}_2\text{Cl}_2$ )  $\delta$  7.48 (d,  $J = 7.7$  Hz, 1H), 7.39 – 7.25 (m, 6H), 7.22 (t,  $J = 7.6$  Hz, 1H), 7.11 (d,  $J = 3.9$  Hz, 1H), 6.91 (t,  $J = 7.6$  Hz, 1H), 6.70 (d,  $J = 7.6$  Hz, 1H), 6.60 (d,  $J = 3.9$  Hz, 1H), 6.48 (dd,  $J = 11.7, 6.1$  Hz, 1H), 5.69 (s, 1H), 5.31 (t,  $J = 8.7$  Hz, 1H), 5.01 – 4.77 (m, 2H).

**<sup>13</sup>C NMR** (101 MHz,  $\text{CD}_2\text{Cl}_2$ )  $\delta$  168.5, 156.4, 143.1, 142.4, 139.8, 139.4, 134.6, 134.1, 133.1, 129.8, 129.1, 128.3, 127.8, 127.3, 125.0, 123.5, 121.2, 121.1, 115.2, 111.8, 105.1, 86.2, 85.3, 59.5, 44.4.

**HRMS** (ESI, *m/z*) Calcd. for  $\text{C}_{27}\text{H}_{17}\text{IN}_2\text{NaO}_3^+$ ,  $[\text{M}+\text{Na}]^+$ : 567.0176, found: 567.0162.

### <Chromatogram>

mAU

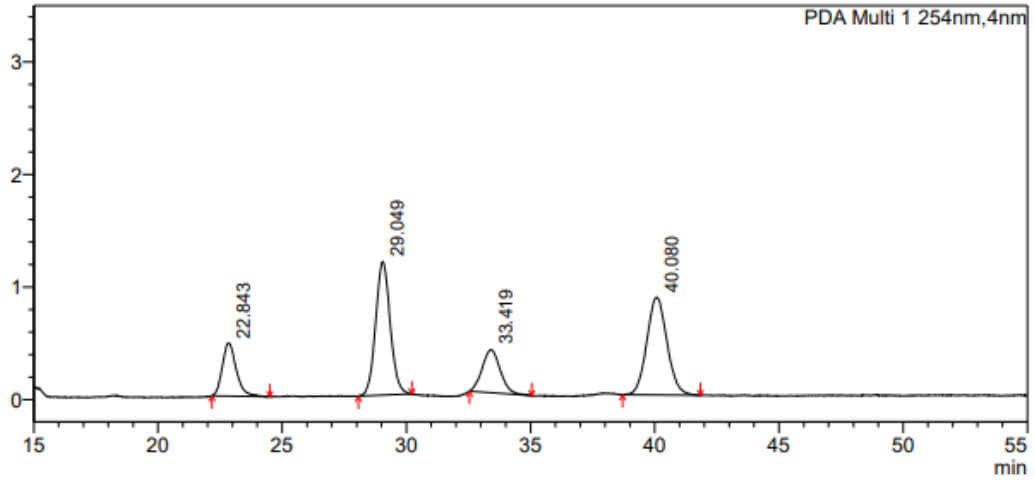

### <Peak Table>

PDA Ch1 254nm

| Peak# | Ret. Time | Area   | Height | Area%   |
|-------|-----------|--------|--------|---------|
| 1     | 22.843    | 18278  | 470    | 13.534  |
| 2     | 29.049    | 48472  | 1187   | 35.890  |
| 3     | 33.419    | 19289  | 381    | 14.282  |
| 4     | 40.080    | 49019  | 866    | 36.295  |
| Total |           | 135058 | 2904   | 100.000 |

### <Chromatogram>

mAU

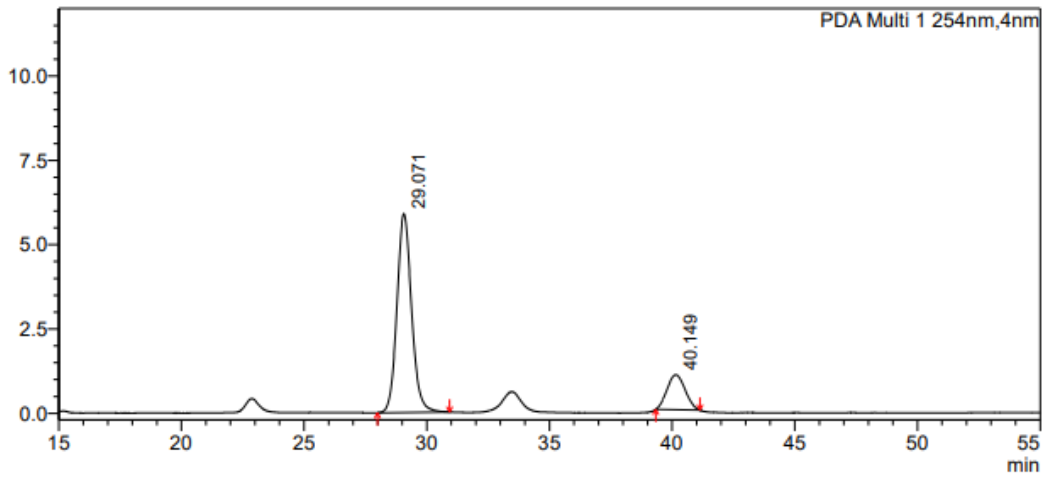

### <Peak Table>

PDA Ch1 254nm

| Peak# | Ret. Time | Area   | Height | Area%   |
|-------|-----------|--------|--------|---------|
| 1     | 29.071    | 244170 | 5893   | 82.115  |
| 2     | 40.149    | 53180  | 1037   | 17.885  |
| Total |           | 297350 | 6930   | 100.000 |

**(1*S*,9*bS*)-1'-benzyl-6'-chlorospiro[benzo[*a*][1,4]oxazino[3,4,5-*cd*]pyrrolizine-1,3'-indoline]-2',3(9*bH*)-dione (3*n*)**

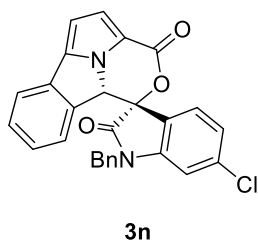

The residue was purified by a silica gel flash chromatography (petroleum ether/ethyl acetate = 100/1 to 10/1) giving the product **3n** as a white solid in 71% yield (32.2 mg), m.p. 228-230 °C;  $[\alpha]^{25}_{\text{D}} = -123.626$  ( $c = 0.5$ ,  $\text{CHCl}_3$ ); 10:1 dr; 96:4 er; determined by HPLC on a Chiralpak IF column at 254 nm (n-hexane/2-propanol = 60/40, 0.7 mL/min),  $t_{\text{R}} = 45.85$  min

(minor),  $t_{\text{R}} = 31.14$  min(major)

**$^1\text{H NMR}$**  (400 MHz,  $\text{CD}_2\text{Cl}_2$ )  $\delta$  7.44 (d,  $J = 7.7$  Hz, 1H), 7.35 – 7.28 (m, 4H), 7.21 (t,  $J = 7.6$  Hz, 1H), 7.07 (t,  $J = 7.6$  Hz, 1H), 6.91 (t,  $J = 7.6$  Hz, 1H), 6.69 (dd,  $J = 7.9, 4.7$  Hz, 2H), 6.57 – 6.48 (m, 2H), 5.72 (s, 1H), 5.05 (d,  $J = 8.1$  Hz, 1H), 4.89 (dd,  $J = 47.0, 15.5$  Hz, 2H).

**$^{13}\text{C NMR}$**  (101 MHz,  $\text{CD}_2\text{Cl}_2$ )  $\delta$  169.1, 156.4, 144.1, 142.9, 139.5, 137.0, 134.7, 134.0, 129.7, 129.1, 128.4, 127.8, 127.3, 125.3, 123.6, 123.5, 121.3, 121.1, 120.9, 115.2, 110.5, 105.2, 84.9, 59.5, 44.4.

**HRMS** (ESI,  $m/z$ ) Calcd. for  $\text{C}_{27}\text{H}_{17}\text{ClN}_2\text{NaO}_3^+$ ,  $[\text{M}+\text{Na}]^+$ : 475.0820, found: 475.0820.

**<Chromatogram>**

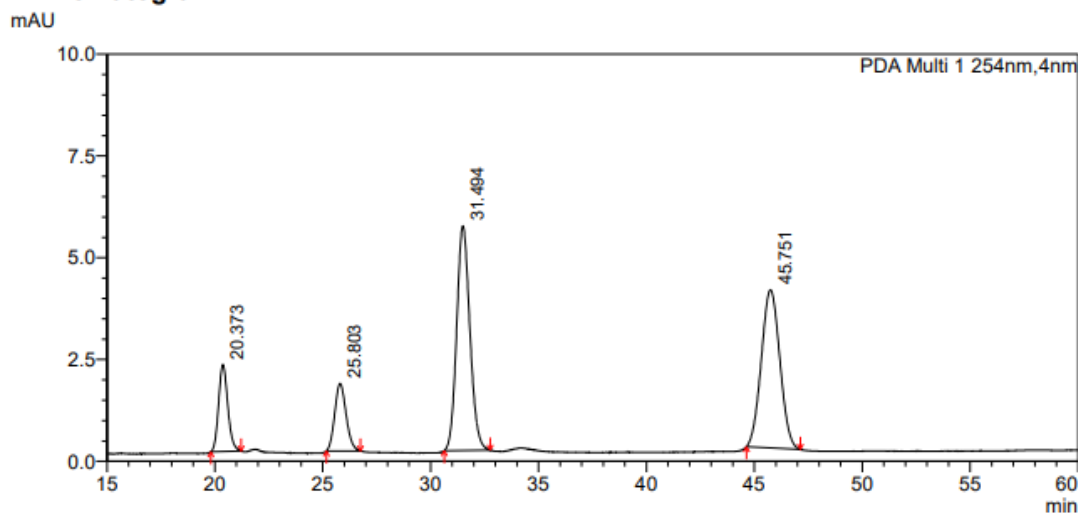

**<Peak Table>**

PDA Ch1 254nm

| Peak# | Ret. Time | Area   | Height | Area%   |
|-------|-----------|--------|--------|---------|
| 1     | 20.373    | 63547  | 2135   | 10.752  |
| 2     | 25.803    | 60662  | 1651   | 10.264  |
| 3     | 31.494    | 234854 | 5516   | 39.736  |
| 4     | 45.751    | 231976 | 3884   | 39.249  |
| Total |           | 591039 | 13186  | 100.000 |

### <Chromatogram>

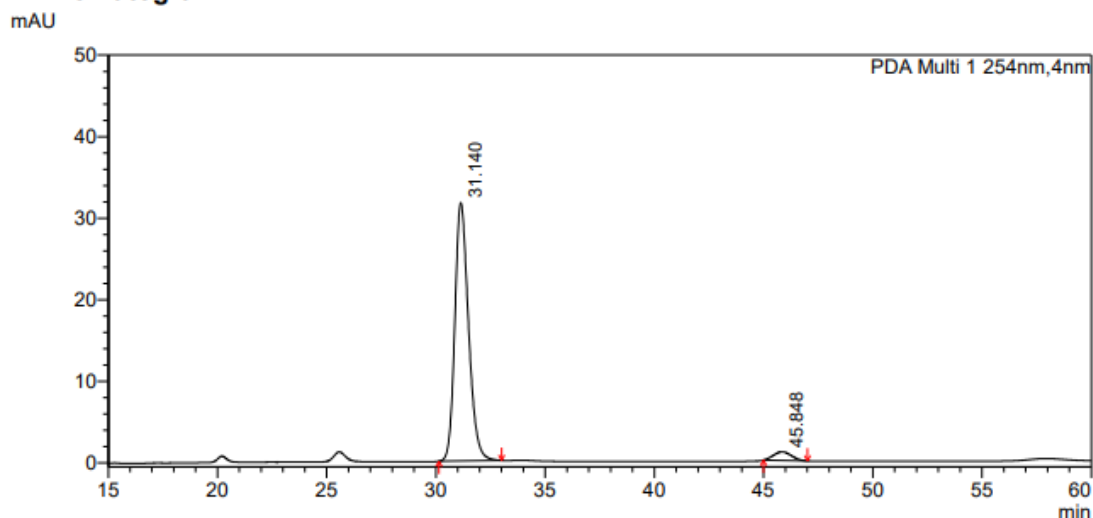

### <Peak Table>

PDA Ch1 254nm

| Peak# | Ret. Time | Area    | Height | Area%   |
|-------|-----------|---------|--------|---------|
| 1     | 31.140    | 1376695 | 31648  | 95.846  |
| 2     | 45.848    | 59670   | 1049   | 4.154   |
| Total |           | 1436364 | 32697  | 100.000 |

(1*S*,9*bS*)-1'-benzyl-6'-bromospiro[benzo[*a*][1,4]oxazino[3,4,5-*cd*]pyrrolizine-1,3'-indoline]-2',3'(9*bH*)-dione(**3o**)

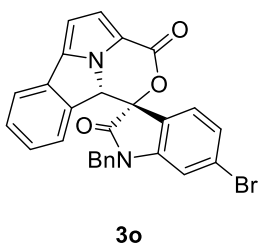

**3o**

The residue was purified by a silica gel flash chromatography (petroleum ether/ethyl acetate = 100/1 to 10/1) giving the product **3o** as a yellow solid in 65% yield (32.1 mg), m.p. 204–206 °C;  $[\alpha]^{25D} = -120.960$  ( $c = 0.5$ ,  $\text{CHCl}_3$ ); 16:1 dr; 87:13 er; determined by HPLC on a Chiralpak IF column at 254 nm (n-hexane/2-propanol = 60/40, 0.7 mL/min),  $t_R = 47.03$  min

(minor),  $t_R = 32.84$  min(major) ;

**<sup>1</sup>H NMR** (400 MHz,  $\text{CD}_2\text{Cl}_2$ )  $\delta$  7.45 (d,  $J = 7.7$  Hz, 1H), 7.37 – 7.27 (m, 5H), 7.25 – 7.19 (m, 1H), 7.09 (t,  $J = 5.9$  Hz, 1H), 6.95 – 6.89 (m, 1H), 6.84 (d,  $J = 1.6$  Hz, 1H), 6.74 – 6.66 (m, 2H), 6.54 (d,  $J = 3.9$  Hz, 1H), 5.72 (s, 1H), 4.99 (d,  $J = 8.1$  Hz, 1H), 4.89 (dd,  $J = 46.7, 15.5$  Hz, 2H).

**<sup>13</sup>C NMR** (101 MHz,  $\text{CD}_2\text{Cl}_2$ )  $\delta$  169.0, 156.3, 144.1, 142.9, 139.5, 134.7, 134.1, 129.7, 129.1, 128.3, 127.7, 127.3, 126.6, 125.5, 125.0, 123.5, 121.8, 121.1, 120.9, 115.2, 113.3, 105.2, 85.0, 59.4, 44.4.

**HRMS** (ESI, m/z) Calcd. for  $\text{C}_{27}\text{H}_{17}\text{BrN}_2\text{NaO}_3^+$ ,  $[\text{M}+\text{Na}]^+$ : 519.0315, found: 519.0313.

### <Chromatogram>

mAU

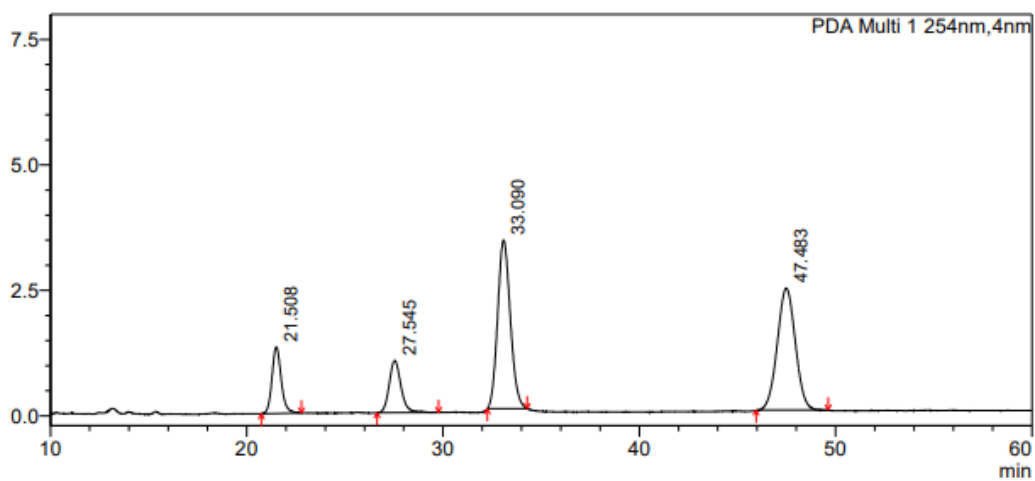

### <Peak Table>

PDA Ch1 254nm

| Peak# | Ret. Time | Area   | Height | Area%   |
|-------|-----------|--------|--------|---------|
| 1     | 21.508    | 43255  | 1323   | 11.028  |
| 2     | 27.545    | 43224  | 1040   | 11.020  |
| 3     | 33.090    | 150836 | 3360   | 38.455  |
| 4     | 47.483    | 154925 | 2426   | 39.497  |
| Total |           | 392241 | 8149   | 100.000 |

### <Chromatogram>

mAU

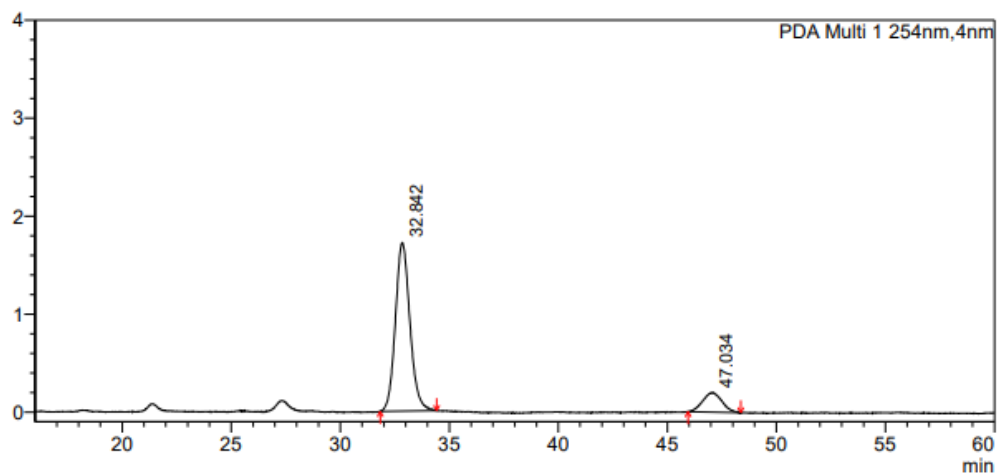

### <Peak Table>

PDA Ch1 254nm

| Peak# | Ret. Time | Area  | Height | Area%   |
|-------|-----------|-------|--------|---------|
| 1     | 32.842    | 79816 | 1719   | 86.824  |
| 2     | 47.034    | 12112 | 198    | 13.176  |
| Total |           | 91928 | 1917   | 100.000 |



**(1*S*,9*bS*)-1'-benzyl-6'-fluorospiro[benzo[*a*][1,4]oxazino[3,4,5-*cd*]pyrrolizine-1,3'-indoline]-2',3(9*bH*)-dione(**3p**)**

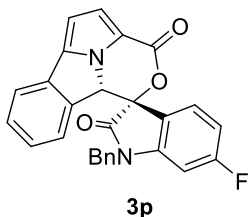

The residue was purified by a silica gel flash chromatography (petroleum ether/ethyl acetate = 100/1 to 10/1) giving the product **3p** as a yellow solid in 48% yield (20.9 mg), m.p. 208-210 °C;  $[\alpha]_D^{25} = 18.325$  ( $c = 0.2$ ,  $\text{CHCl}_3$ ); 3:1 dr; 92:8 er; determined by HPLC on a Chiralpak IF column at 254 nm

(*n*-hexane/2-propanol = 60/40, 0.7 mL/min),  $t_R = 43.55$  min (minor),  $t_R = 28.90$  min (major);

**$^1\text{H NMR}$**  (400 MHz,  $\text{CD}_2\text{Cl}_2$ )  $\delta$  7.45 (d,  $J = 7.7$  Hz, 1H), 7.34 – 7.27 (m, 5H), 7.24 – 7.18 (m, 1H), 7.09 (d,  $J = 3.9$  Hz, 1H), 6.94 – 6.88 (m, 1H), 6.72 (dd,  $J = 7.7, 0.8$  Hz, 1H), 6.54 (t,  $J = 4.0$  Hz, 1H), 6.42 (dd,  $J = 8.8, 2.3$  Hz, 1H), 6.26 – 6.19 (m, 1H), 5.73 (s, 1H), 5.10 (dd,  $J = 8.4, 5.3$  Hz, 1H), 4.98 – 4.79 (m, 2H).

**$^{13}\text{C NMR}$**  (101 MHz,  $\text{CD}_2\text{Cl}_2$ )  $\delta$  168.9, 159.1 (d,  $J = 243.4$  Hz), 156.2, 142.9, 139.5, 138.8, 134.9, 134.1, 129.0, 128.5 (d,  $J = 246.4$  Hz), 128.3, 127.8, 124.2 (d,  $J = 9.1$  Hz), 123.5, 121.2, 120.9, 117.4 (d,  $J = 23.2$  Hz), 115.1, 112.5, 112.2, 110.7 (d,  $J = 8.1$  Hz), 105.2, 85.3 (d,  $J = 1.2$  Hz), 59.5, 44.4.

**$^{19}\text{F NMR}$**  (377 MHz,  $\text{CDCl}_3$ )  $\delta$  -117.82.

**HRMS** (ESI,  $m/z$ ) Calcd. for  $\text{C}_{27}\text{H}_{17}\text{FN}_2\text{NaO}_3^+$ ,  $[\text{M}+\text{Na}]^+$ : 459.1115, found: 459.1106.

**<Chromatogram>**

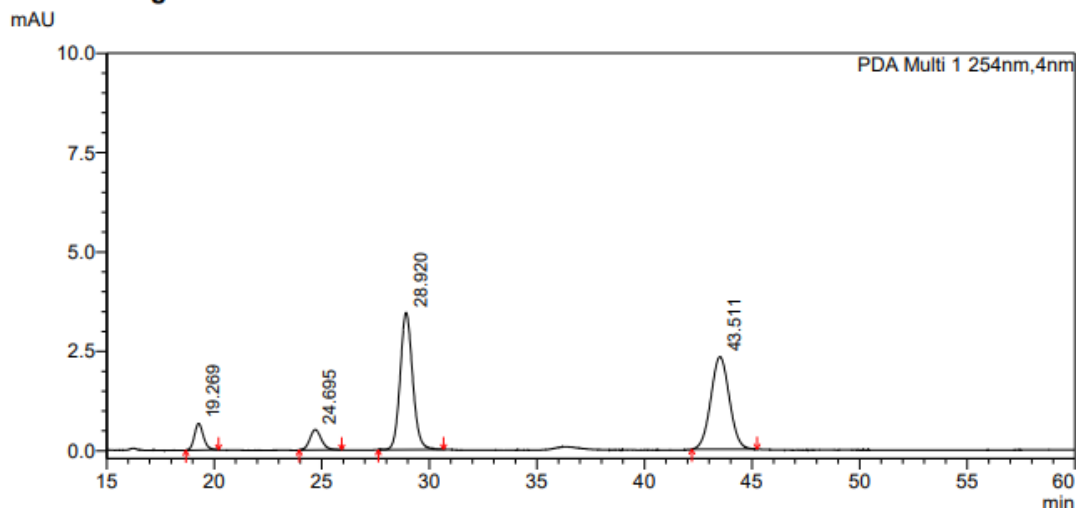

**<Peak Table>**

PDA Ch1 254nm

| Peak# | Ret. Time | Area   | Height | Area%   |
|-------|-----------|--------|--------|---------|
| 1     | 19.269    | 19448  | 668    | 6.128   |
| 2     | 24.695    | 18955  | 511    | 5.973   |
| 3     | 28.920    | 139235 | 3444   | 43.874  |
| 4     | 43.511    | 139716 | 2325   | 44.025  |
| Total |           | 317354 | 6948   | 100.000 |

<Chromatogram>

mAU

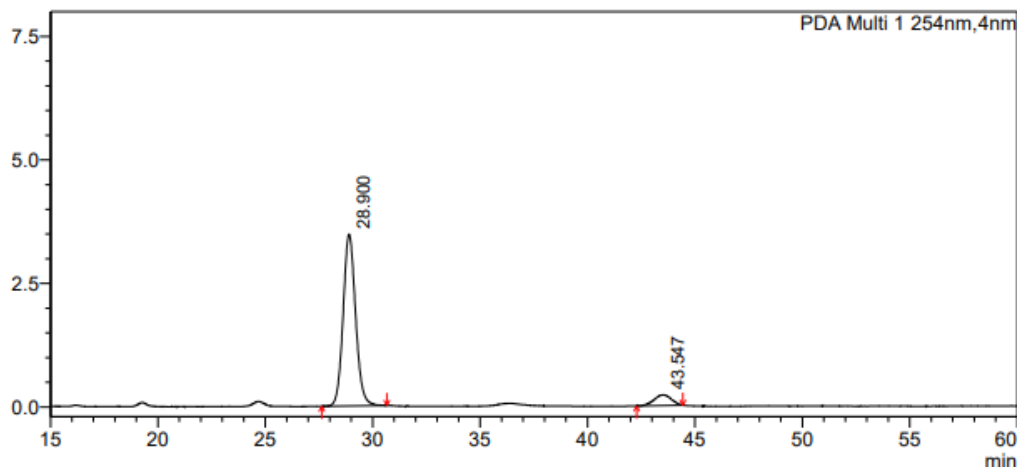

<Peak Table>

PDA Ch1 254nm

| Peak# | Ret. Time | Area   | Height | Area%   |
|-------|-----------|--------|--------|---------|
| 1     | 28.900    | 140575 | 3474   | 92.115  |
| 2     | 43.547    | 12033  | 215    | 7.885   |
| Total |           | 152608 | 3689   | 100.000 |

(1*S*,9*bS*)-1'-benzyl-6'-methoxyspiro[benzo[*a*][1,4]oxazino[3,4,5-*cd*]pyrrolizine-1,3'-indoline]-2',3(9*bH*)-dione(**3q**)

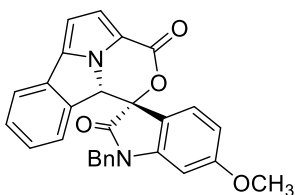

**3q**

The residue was purified by a silica gel flash chromatography (petroleum ether/ethyl acetate = 100/1 to 10/1) giving the product **3q** as a yellow solid in 88% yield (39.7 mg), m.p. 210-212 °C;  $[\alpha]_D^{25} = -113.063$  ( $c = 0.5$ , CHCl<sub>3</sub>); 6:1 dr; 86:14 er; determined by HPLC on a Chiralpak IF column at 254 nm (n-hexane/2-propanol = 60/40, 0.5

mL/min),  $t_R = 93.18$  min(minor),  $t_R = 61.40$  min(major) ;

**<sup>1</sup>H NMR** (400 MHz, CD<sub>2</sub>Cl<sub>2</sub>)  $\delta$  7.43 (d,  $J = 7.7$  Hz, 1H), 7.35 – 7.23 (m, 5H), 7.19 (t,  $J = 7.6$  Hz, 1H), 7.06 (t,  $J = 5.0$  Hz, 1H), 6.89 (dd,  $J = 11.0, 4.2$  Hz, 1H), 6.70 (t,  $J = 10.4$  Hz, 1H), 6.52 (d,  $J = 3.9$  Hz, 1H), 6.21 (t,  $J = 7.8$  Hz, 1H), 5.98 (dt,  $J = 24.8, 12.4$  Hz, 1H), 5.71 (s, 1H), 5.07 (d,  $J = 8.4$  Hz, 1H), 4.89 (dt,  $J = 34.4, 14.7$  Hz, 2H), 3.47 (s, 3H).

**<sup>13</sup>C NMR** (101 MHz, CD<sub>2</sub>Cl<sub>2</sub>)  $\delta$  169.7, 162.1, 157.0, 144.4, 142.7, 140.1, 135.2, 134.2, 129.5, 129.0, 128.2, 127.8, 127.2, 125.3, 123.6, 121.0, 120.6, 115.5, 114.5, 107.0, 105.0, 98.0, 85.6, 59.8, 55.4, 44.3.

**HRMS** (ESI, m/z) Calcd. for C<sub>28</sub>H<sub>20</sub>N<sub>2</sub>NaO<sub>4</sub><sup>+</sup>, [M+Na]<sup>+</sup>: 471.1315, found: 471.1310.

<Chromatogram>

mAU

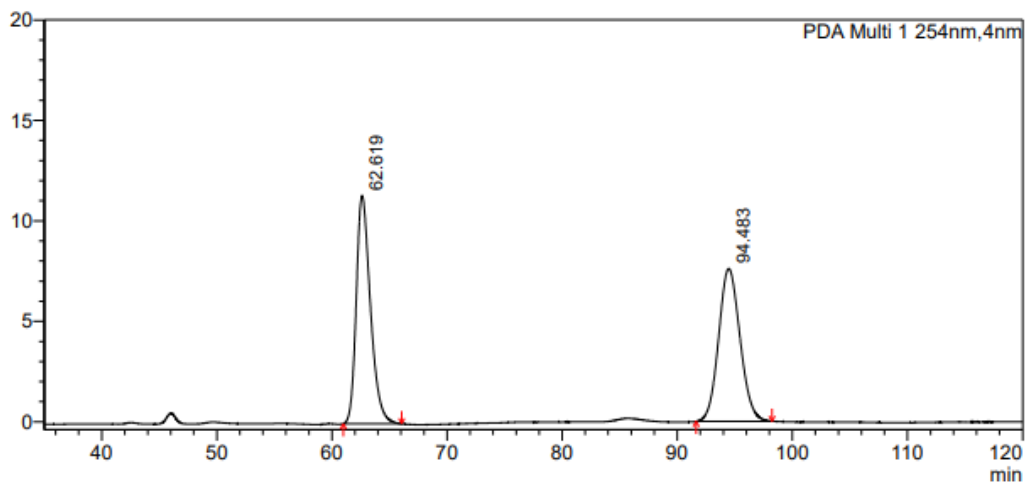

<Peak Table>

PDA Ch1 254nm

| Peak# | Ret. Time | Area    | Height | Area%   |
|-------|-----------|---------|--------|---------|
| 1     | 62.619    | 970314  | 11361  | 49.668  |
| 2     | 94.483    | 983294  | 7600   | 50.332  |
| Total |           | 1953608 | 18960  | 100.000 |

<Chromatogram>

mAU

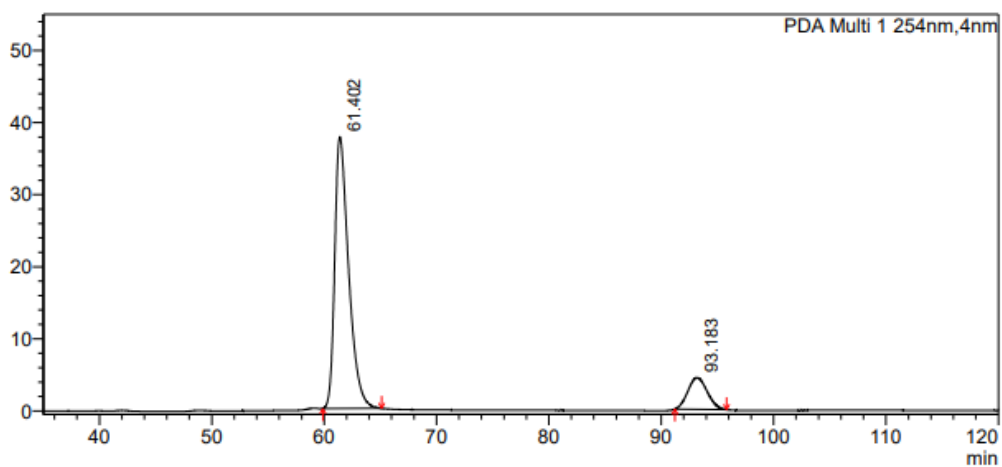

<Peak Table>

PDA Ch1 254nm

| Peak# | Ret. Time | Area    | Height | Area%   |
|-------|-----------|---------|--------|---------|
| 1     | 61.402    | 3240730 | 37692  | 86.045  |
| 2     | 93.183    | 525605  | 4399   | 13.955  |
| Total |           | 3766335 | 42091  | 100.000 |

**(1S,9bS)-1'-benzyl-7'-methylspiro[benzo[a][1,4]oxazino[3,4,5-cd]pyrrolizine-1,3'-indoline]-2',3(9bH)-dione(3r)**

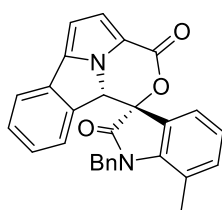

**3r**

The residue was purified by a silica gel flash chromatography (petroleum ether/ethyl acetate = 100/1 to 10/1) giving the product **3r** as a yellow solid in 76% yield (33.2 mg), m.p. 242-244 °C;  $[\alpha]^{25}_{\text{D}} = -113.696$  (c = 0.25, CHCl<sub>3</sub>); 16:1 dr; 89:11 er; determined by HPLC on a Chiralpak IF column at 254 nm (n-hexane/2-propanol = 60/40, 0.7 mL/min),  $t_{\text{R}} = 67.43$  min (minor),  $t_{\text{R}} =$

52.88 min(major);

**<sup>1</sup>H NMR** (400 MHz, CD<sub>2</sub>Cl<sub>2</sub>)  $\delta$  7.49 (d,  $J = 7.7$  Hz, 1H), 7.36 – 7.22 (m, 4H), 7.18 (d,  $J = 7.1$  Hz, 2H), 7.09 (d,  $J = 3.9$  Hz, 1H), 7.03 (m, 1H), 6.91 (dd,  $J = 7.6, 0.7$  Hz, 1H), 6.79 (d,  $J = 7.6$  Hz, 1H), 6.57 (d,  $J = 3.9$  Hz, 1H), 6.48 (t,  $J = 7.7$  Hz, 1H), 5.78 (s, 1H), 5.28 (d,  $J = 16.8$  Hz, 1H), 5.14 (d,  $J = 16.8$  Hz, 1H), 4.96 (d,  $J = 7.1$  Hz, 1H), 2.13 (s, 3H).

**<sup>13</sup>C NMR** (101 MHz, CD<sub>2</sub>Cl<sub>2</sub>)  $\delta$  170.3, 156.7, 142.6, 141.0, 140.0, 136.8, 135.2, 134.2, 129.5, 129.0, 127.7, 127.1, 125.9, 123.8, 123.8, 123.4, 121.9, 121.0, 121.0, 120.6, 115.4, 105.1, 84.9, 59.5, 45.6, 18.6.

**HRMS** (ESI, m/z) Calcd. for C<sub>28</sub>H<sub>2</sub>N<sub>2</sub>NaO<sub>3</sub><sup>+</sup>, [M+Na]<sup>+</sup>: 455.1366, found: 455.1361.

<Chromatogram>

mAU

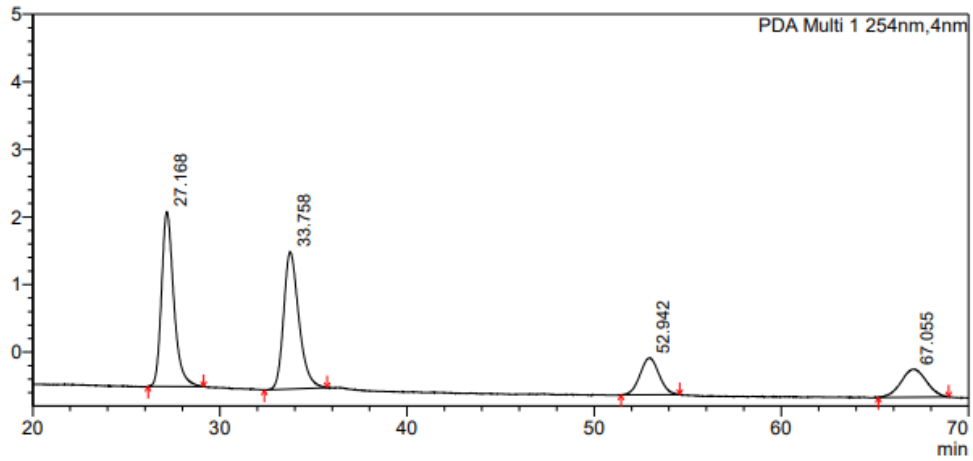

<Peak Table>

PDA Ch1 254nm

| Peak# | Ret. Time | Area   | Height | Area%   |
|-------|-----------|--------|--------|---------|
| 1     | 27.168    | 118345 | 2588   | 38.053  |
| 2     | 33.758    | 115210 | 2026   | 37.045  |
| 3     | 52.942    | 38494  | 545    | 12.378  |
| 4     | 67.055    | 38951  | 414    | 12.524  |
| Total |           | 310999 | 5573   | 100.000 |

<Chromatogram>

mAU

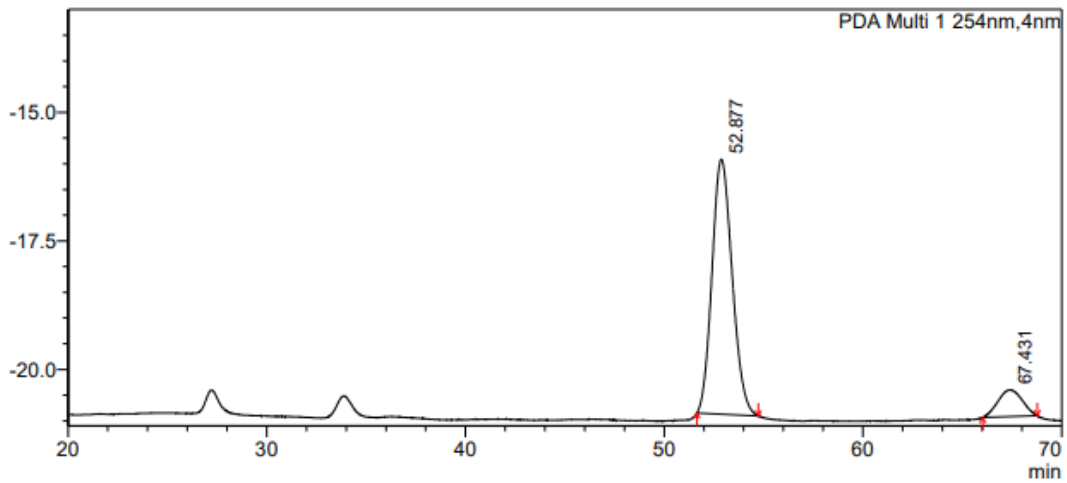

<Peak Table>

PDA Ch1 254nm

| Peak# | Ret. Time | Area   | Height | Area%   |
|-------|-----------|--------|--------|---------|
| 1     | 52.877    | 350185 | 4957   | 88.785  |
| 2     | 67.431    | 44233  | 518    | 11.215  |
| Total |           | 394418 | 5475   | 100.000 |

**(1S,9bS)-1'-benzyl-4',6'-dimethylspiro[benzo[a][1,4]oxazino[3,4,5-cd]pyrrolizine-1,3'-indoline]-2',3(9bH)-dione(3s)**

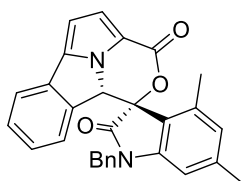

**3s**

The residue was purified by a silica gel flash chromatography (petroleum ether/ethyl acetate = 100/1 to 10/1) giving the product **3s** as a yellow solid in 82% yield (36.5 mg), m.p. 176–178 °C;  $[\alpha]^{25}_{\text{D}} = -180.272$  ( $c = 0.2$ ,  $\text{CHCl}_3$ ); >20:1 dr; 97:3 er; determined by HPLC on a Chiralpak IF column at 254 nm (n-hexane/2-propanol = 60/40, 0.7 mL/min),  $t_{\text{R}} = 62.82$  min

(minor),  $t_{\text{R}} = 44.61$  min(major);

**$^1\text{H NMR}$**  (400 MHz,  $\text{CD}_2\text{Cl}_2$ )  $\delta$  7.48 (d,  $J = 7.7$  Hz, 1H), 7.32 – 7.21 (m, 4H), 7.16 (d,  $J = 7.1$  Hz, 2H), 7.09 (d,  $J = 3.9$  Hz, 1H), 7.02 (td,  $J = 7.6, 0.8$  Hz, 1H), 6.89 (d,  $J = 7.6$  Hz, 1H), 6.61 – 6.55 (m, 2H), 5.76 (s, 1H), 5.23 (dd,  $J = 9.3, 5.4$  Hz, 1H), 5.11 (d,  $J = 16.8$  Hz, 1H), 4.76 (s, 1H), 2.07 (s, 3H), 1.80 (s, 3H).

**$^{13}\text{C NMR}$**  (101 MHz,  $\text{CDCl}_3$ )  $\delta$  170.3, 157.2, 142.6, 140.0, 138.4, 136.6, 135.6, 134.2, 133.4, 129.5, 129.0, 127.7, 127.2, 126.0, 123.9, 123.4, 122.8, 121.0, 120.9, 120.2, 115.6, 104.8, 85.3, 59.5, 45.5, 20.5, 18.6.

**HRMS** (ESI,  $m/z$ ) Calcd. for  $\text{C}_{29}\text{H}_{22}\text{N}_2\text{NaO}_3^+$ ,  $[\text{M}+\text{Na}]^+$ : 469.1523, found: 469.1517.

**<Chromatogram>**

mAU

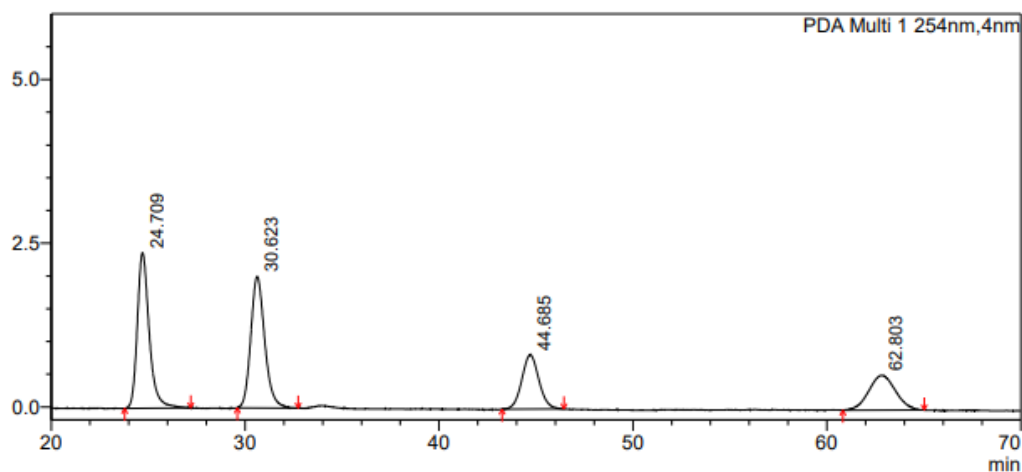

**<Peak Table>**

PDA Ch1 254nm

| Peak# | Ret. Time | Area   | Height | Area%   |
|-------|-----------|--------|--------|---------|
| 1     | 24.709    | 101775 | 2376   | 33.470  |
| 2     | 30.623    | 100528 | 2005   | 33.060  |
| 3     | 44.685    | 50825  | 827    | 16.714  |
| 4     | 62.803    | 50952  | 530    | 16.756  |
| Total |           | 304080 | 5738   | 100.000 |

### <Chromatogram>

mAU

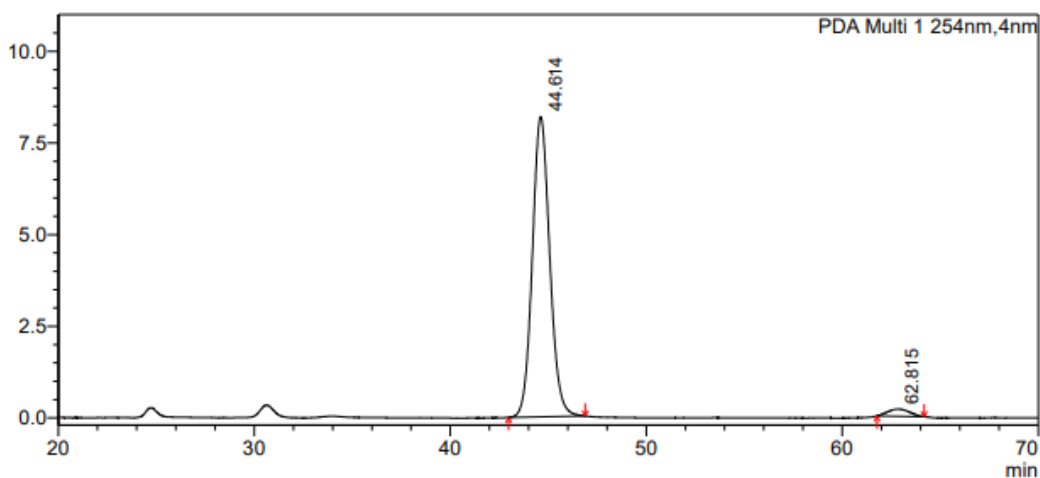

### <Peak Table>

PDA Ch1 254nm

| Peak# | Ret. Time | Area   | Height | Area%   |
|-------|-----------|--------|--------|---------|
| 1     | 44.614    | 505633 | 8190   | 97.104  |
| 2     | 62.815    | 15080  | 195    | 2.896   |
| Total |           | 520712 | 8385   | 100.000 |

(1S,9bS)-1'-methylspiro[benzo[a][1,4]oxazino[3,4,5-cd]pyrrolizine-1,3'-indoline]-2',3(9bH)-dione (**3t**)

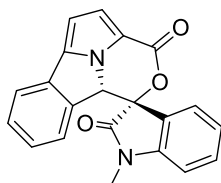

**3t**

The residue was purified by a silica gel flash chromatography (petroleum ether/ethyl acetate = 100/1 to 10/1) giving the product **3t** as a yellow solid in 72% yield (26.5 mg), m.p. 185-187 °C;  $[\alpha]^{25}_{\text{D}} = -123.126$  ( $c = 0.2$ ,  $\text{CHCl}_3$ ); >20:1 dr; 82:18 er; determined by HPLC on a Chiralpak IF column at 254 nm (n-hexane/2-propanol = 60/40, 0.7 mL/min),  $t_{\text{R}} = 28.15$  min (minor),  $t_{\text{R}} = 29.76$  min(major);

**$^1\text{H NMR}$**  (400 MHz,  $\text{CD}_2\text{Cl}_2$ )  $\delta$  7.58 (t,  $J = 6.1$  Hz, 1H), 7.35 (t,  $J = 7.7$  Hz, 1H), 7.25 – 7.19 (m, 2H), 7.17 – 7.11 (m, 1H), 7.07 (d,  $J = 7.4$  Hz, 1H), 6.83 (d,  $J = 7.9$  Hz, 1H), 6.69 (dd,  $J = 8.0, 5.8$  Hz, 2H), 5.85 (s, 1H), 5.30 (d,  $J = 7.5$  Hz, 1H), 3.36 (s, 3H).

**$^{13}\text{C NMR}$**  (101 MHz,  $\text{CD}_2\text{Cl}_2$ )  $\delta$  168.9, 157.5, 156.7, 143.6, 142.7, 140.0, 134.2, 131.1, 129.5, 127.2, 123.9, 123.5, 123.3, 122.7, 121.0, 120.6, 115.4, 109.0, 105.1, 85.5, 59.5, 26.6.

**HRMS** (ESI, m/z) Calcd. for  $\text{C}_{21}\text{H}_{14}\text{N}_2\text{NaO}_3^+$ ,  $[\text{M}+\text{Na}]^+$ : 365.0897, found: 365.0888.

### <Chromatogram>

mAU

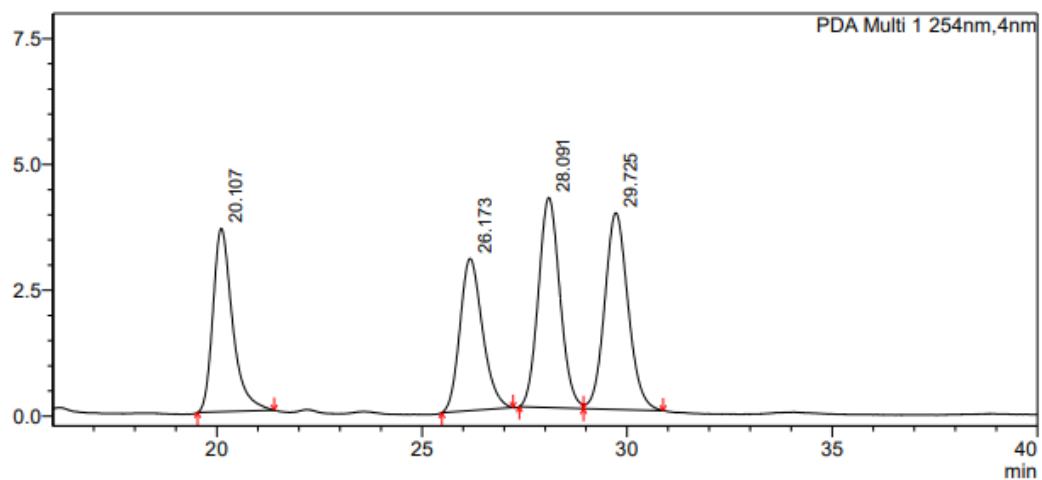

### <Peak Table>

PDA Ch1 254nm

| Peak# | Ret. Time | Area   | Height | Area%   |
|-------|-----------|--------|--------|---------|
| 1     | 20.107    | 121247 | 3645   | 22.292  |
| 2     | 26.173    | 115768 | 3022   | 21.285  |
| 3     | 28.091    | 152231 | 4170   | 27.989  |
| 4     | 29.725    | 154656 | 3906   | 28.435  |
| Total |           | 543902 | 14742  | 100.000 |

### <Chromatogram>

mAU

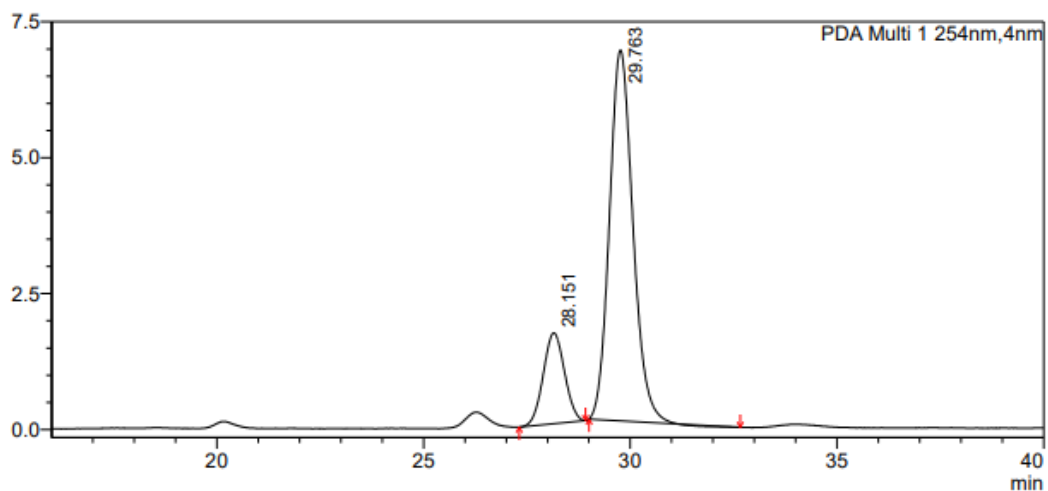

### <Peak Table>

PDA Ch1 254nm

| Peak# | Ret. Time | Area   | Height | Area%   |
|-------|-----------|--------|--------|---------|
| 1     | 28.151    | 59902  | 1671   | 18.228  |
| 2     | 29.763    | 268732 | 6818   | 81.772  |
| Total |           | 328634 | 8488   | 100.000 |



## 6. Large scale reaction and synthetic transformation of 3a

### Large scale reaction for 3a synthesis

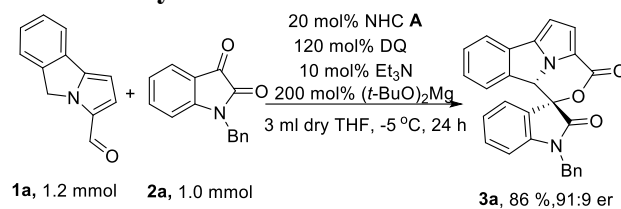

To a 50 mL vial equipped with a magnetic stir bar were added **1a** (1.2 mmol 237.3 mg), **2a** (1.0 mmol 219 mg), DQ (2.0 mmol 490.4 mg), Et<sub>3</sub>N (0.1 mmol 15  $\mu$ L), pre-NHC A (0.2 mmol 112 mg) and (t-BuO)<sub>2</sub>Mg (2.0 mmol 336 mg) in dry THF (30.0 mL) and the reaction was stirred in ice bath at -5 °C for 24 h. Then the mixture was concentrated under reduced pressure. The resulting crude residue was purified by column chromatography on silica gel (petroleum ether/ethyl acetate = 100/1 to 10/1) to afford the desired product **3a**. (White solid, 359 mg, 86 % yield, 91:9 er, >20:1 dr)

### synthetic transformation of 3a<sup>4</sup>

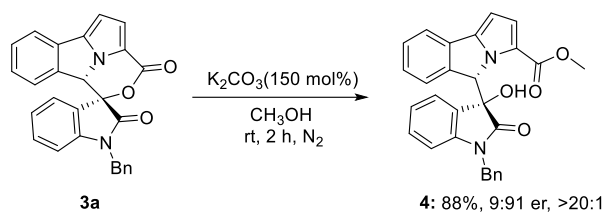

To a 10 mL flame-dry Schlenk reaction flask equipped with a magnetic stir bar was added **3a** (41.84 mg, 0.10 mmol), K<sub>2</sub>CO<sub>3</sub> (41.46 mg, 0.15 mmol). The flask was then sealed, evacuated, and backfilled with nitrogen three times using standard Schlenk techniques, and anhydrous CH<sub>3</sub>OH (2.0 mL) was added as solvent, the reaction mixture was stirred at room temperature for 2 hours and evaporated. The resulting crude residue was purified by column chromatography on silica gel (petroleum ether/ethyl acetate = 100/1 to 10/1) to afford the desired product **4**. (yellow solid, 396 mg, 86% yield, 9:91 er, >20:1 dr)

**methyl (S)-5-((R)-1-benzyl-3-hydroxy-2-oxindolin-3-yl)-5H-pyrrolo[2,1-a]isoindole-3-carboxylate (4)**

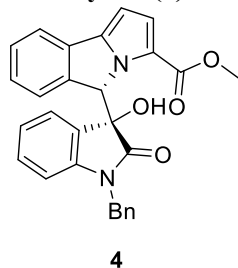

The residue was purified by a silica gel flash chromatography (petroleum ether/ethyl acetate = 10/1) giving the product **4** as a yellow solid in 88% yield (39.6 mg), m.p. 166-168 °C;  $[\alpha]^{25}_{\text{D}} = -387.793$  ( $c = 0.2$ ,  $\text{CHCl}_3$ ); >20:1 dr; 9:91 er; determined by HPLC on a Chiralpak IF column at 254 nm (n-hexane/2-propanol = 60/40, 0.7 mL/min),  $t_{\text{R}} = 16.16$  min (minor),  $t_{\text{R}} = 14.48$

min(major);

**$^1\text{H NMR}$**  (400 MHz,  $\text{CD}_2\text{Cl}_2$ )  $\delta$  7.30 – 7.16 (m, 7H), 7.08 – 6.94 (m, 2H), 6.86 (td,  $J = 7.8, 1.3$  Hz, 1H), 6.76 (td,  $J = 7.6, 1.1$  Hz, 1H), 6.55 (td,  $J = 7.6, 0.9$  Hz, 1H), 6.36 (dd,  $J = 10.7, 5.9$  Hz, 2H), 6.20 (s, 1H), 6.01 (s, 1H), 5.77 (dd,  $J = 7.5, 0.8$  Hz, 1H), 4.87 (d,  $J = 15.6$  Hz, 1H), 4.63 (d,  $J = 15.5$  Hz, 1H).

**$^{13}\text{C NMR}$**  (101 MHz,  $\text{CD}_2\text{Cl}_2$ )  $\delta$  175.7, 164.5, 145.4, 142.5, 139.6, 135.5, 132.0, 129.5, 128.7, 128.7, 127.8, 127.8, 126.4, 126.3, 124.1, 123.3, 123.2, 122.7, 121.8, 119.3, 108.6, 100.9, 80.1, 67.1, 52.1, 43.9.

**HRMS** (ESI, m/z) Calcd. for  $\text{C}_{28}\text{H}_{23}\text{N}_2\text{O}_4^+$ ,  $[\text{M}+\text{H}]^+$ : 451.1652, found: 451.1652.

**<Chromatogram>**

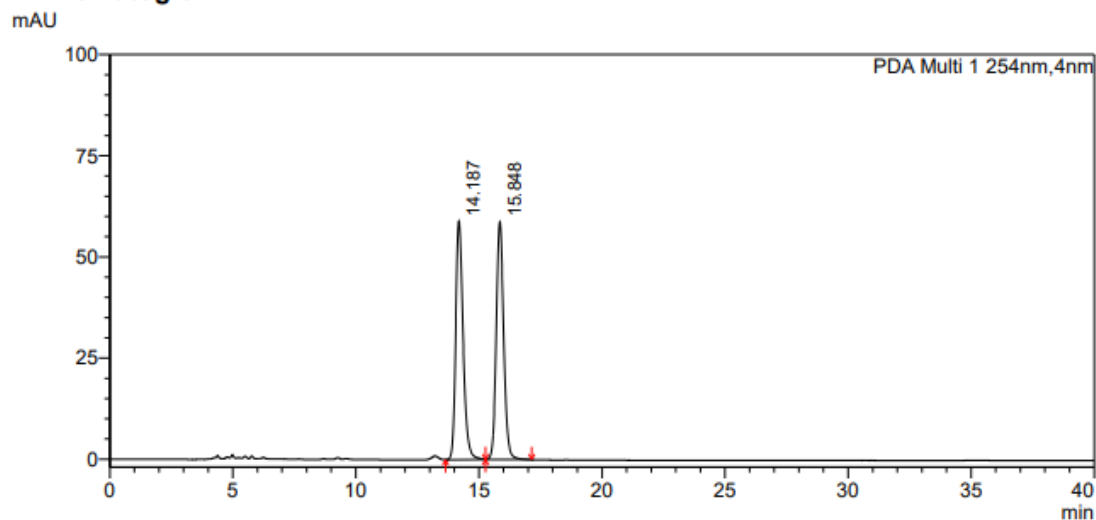

**<Peak Table>**

| PDA Ch1 254nm |           |         |        |         |
|---------------|-----------|---------|--------|---------|
| Peak#         | Ret. Time | Area    | Height | Area%   |
| 1             | 14.187    | 1232854 | 58983  | 49.981  |
| 2             | 15.848    | 1233815 | 58753  | 50.019  |
| Total         |           | 2466669 | 117737 | 100.000 |

<Chromatogram>

mAU

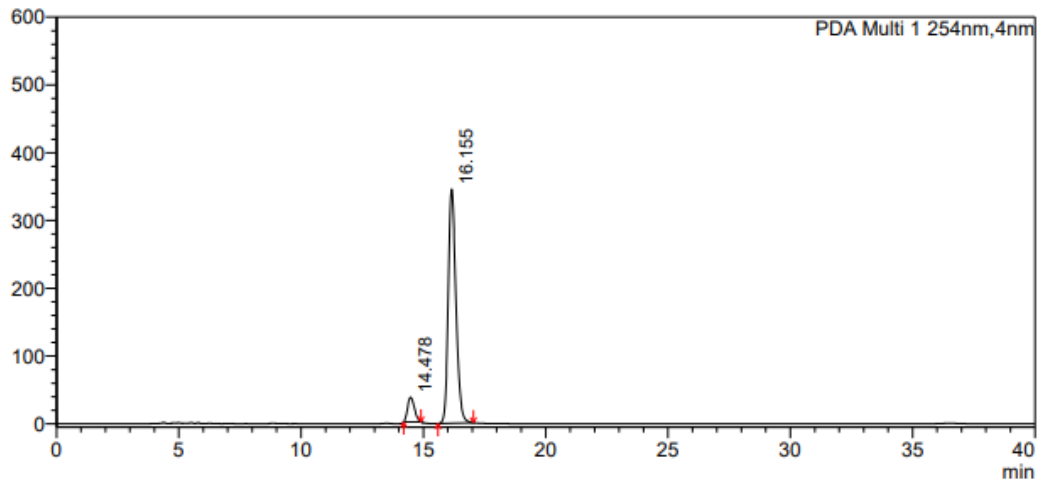

<Peak Table>

PDA Ch1 254nm

| Peak# | Ret. Time | Area    | Height | Area%   |
|-------|-----------|---------|--------|---------|
| 1     | 14.478    | 706143  | 36241  | 8.561   |
| 2     | 16.155    | 7542065 | 345261 | 91.439  |
| Total |           | 8248208 | 381503 | 100.000 |

## 7. Anti-Xoo and anti-Xac activities of Products in Vitro

Antibacterial activities of the target compounds **3** against Xac(*Xanthomonas axonopodis* pv. Citri) and Xoo(*Xanthomonas oryzae* pv. *oryzae*) in vitro were evaluated by using the turbidimeter test, commercial agricultural antibacterial thiodiazole-copper and Bismertiazol were used as control. The compounds to be measured were dissolved in 150  $\mu\text{L}$  of dimethylformamide and diluted with 0.1% (V/V) Tween-20 to prepare two concentrations of 100  $\mu\text{g}/\text{mL}$ . 1 mL of the liquid sample was added to the non-toxic nutrient broth (NB: 1.5 g of beef extract, 2.5 g of peptone, 0.5 g of yeast powder, 5.0 g of glucose and 500 mL of distilled water, pH = 7.0 -7.2) liquid medium in 4 mL tubes. Then, 40  $\mu\text{L}$  of NB containing Xac and Xoo was added separately to 5 mL of solvent NB containing the test compounds, thiodiazole-copper. The inoculated test tubes were incubated at  $(30 \pm 1) ^\circ\text{C}$  under continuous shaking at 180 rpm for 38 h. The culture growth was monitored spectrophotometric ally by measuring the optical density at 595 nm (OD595) and expressed as corrected turbidity. The relative inhibitory rate (I %) compared with a blank assay was calculated as follows:

$$\text{Relative inhibitory rate I (\%)} = (\text{C}_{\text{tur}} - \text{T}_{\text{tur}}) / \text{C}_{\text{tur}} \times 100$$

C<sub>tur</sub>: the corrected turbidity value of bacterial growth on untreated NB;

T<sub>tur</sub>: the corrected turbidity value of bacterial growth on treated NB;

I: The relative inhibitory rate.

Each experiment was repeated thrice

**Table 2.** Antibacterial activities<sup>a</sup> of the target compounds **3** against Xac and Xoo.

| compound               | Inhibition rate(%) of 100 µg/mL |             |
|------------------------|---------------------------------|-------------|
|                        | Xac                             | Xoo         |
| <b>3b</b>              | 41.17±4.25                      | 81.76±1.65  |
| <b>3c</b>              | 75.26±1.84                      | 79.05±1.54  |
| <b>3d</b>              | 77.84±5.25                      | 78.65±12.69 |
| <b>3e</b>              | 80.06±8.27                      | 38.42±2.3   |
| <b>3f</b>              | 77.49±2.22                      | 76.67±5.85  |
| <b>3g</b>              | 30.82±5.97                      | 77.57±5.7   |
| <b>3h</b>              | 68.71±8.19                      | 52.97±5.15  |
| <b>3i</b>              | 70.53±3.54                      | 80.05±2.91  |
| <b>3j</b>              | 44.39±2.98                      | 77.75±1.72  |
| <b>3k</b>              | 35.26±4.67                      | 74.46±5.79  |
| <b>3l</b>              | 78.95±1.11                      | 77.84±5.55  |
| <b>3m</b>              | 56.14±2.46                      | 82.25±1.89  |
| <b>3n</b>              | 31.87±2.72                      | 65.23±0.96  |
| <b>3o</b>              | 56.37±5.4                       | 79.14±1.91  |
| <b>3p</b>              | 42.51±3.48                      | 54.77±2.56  |
| <b>3q</b>              | 27.95±2.4                       | 79.86±2.46  |
| <b>3r</b>              | 27.37±3.75                      | 63.74±3.06  |
| <b>3s</b>              | 72.11±7.42                      | 67.57±5.03  |
| <b>3t</b>              | 47.13±6.02                      | 71.13±4.78  |
| <b>BT</b> <sup>b</sup> | 45.73±4.92                      | 53.69±2.8   |
| <b>TC</b> <sup>c</sup> | 54.33±3.29                      | 59.73±1.9   |

<sup>a</sup>All data were average data of three replicates <sup>b</sup>BT = Bismethiazol <sup>c</sup>TC = Thiodiazole Copper

## 8. References

1. J. E. Taylor, M. D. Jones, J. M. J. Williams, and S. D. Bull, *Org. Lett.*, 2010, **12**, 5740-5743.
2. G. Bertuzzi, V. Corti, J. A. Izzo, S. Ricko, N. I. Jessen, and K. A. Jørgensen, *J. Am. Chem. Soc.* 2022, **144**, 1056-1065.
3. Y. Abdelhamid, K. Kasten, J. Dunne, W. C. Hartley, C. M. Young, D. B. Cordes, A. M. Z. Slawin, S. Ng, A. D. Smith, *Org. Lett.* 2022, **24**, 5444-5449.
4. X. Q. Yang, J. Sun, X. Huang, and Zh. Ch. Jin. *Org. Lett.* 2022, **24**, 5474-5479.

## 9. X-ray crystallography of compound **3k**.

Good quality crystal of **3k** (colourless needle crystal) was obtained by vaporization of a petroleum ether / dichloromethane solution of cycloaddition compound **3k** (~60 mg). A suitable crystal with dimensions  $0.1 \times 0.16 \times 0.2 \text{ mm}^3$  was selected and mounted on a Bruker APEX-II CCD diffractometer. CCDC:2244403 contains the supplementary crystallographic data for this paper. The crystal was kept at a steady  $T = 273.15 \text{ K}$  during data collection. These data can be obtained free of charge from The Cambridge Crystallographic

Data Centre via <https://www.ccdc.cam.ac.uk/>.

### Supplementary Table 5. X-ray analysis data of compounds **3k**.

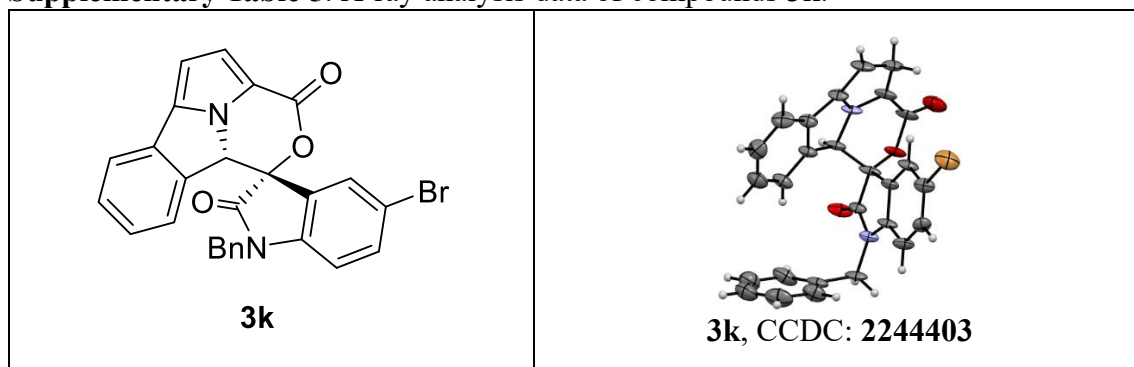

**Crystal Data.**  $\text{C}_{28}\text{H}_{20}\text{BrCl}_2\text{N}_2\text{O}_3$ , ( $M = 583.27 \text{ g/mol}$ ): orthorhombic, space group  $P2_12_12_1$  (no. 19),  $a = 9.824(5) \text{ \AA}$ ,  $b = 14.724(9) \text{ \AA}$ ,  $c = 17.133(10) \text{ \AA}$ ,  $\alpha = \beta = \gamma = 90^\circ$ ,  $V = 2478(2) \text{ \AA}^3$ ,  $Z = 4$ ,  $Z' = 1$ ,  $T = 298 \text{ K}$ ,  $\mu(\text{CuK}\alpha) = 4.530 \text{ mm}^{-1}$ ,  $D_{\text{calc}} = 1.563 \text{ g/cm}^3$ , 16610 reflections measured, 4705 unique ( $R_{\text{int}} = 0.0675$ ,  $R_{\text{sigma}} = 0.0664$ ) which were used in all calculations. The final  $R_1$  was 0.0911 ( $I > 2\sigma(I)$ ) and  $wR_2$  was 0.2399 (all data).

**Cartesian coordinates of all the optimized structures****Table 6 Fractional Atomic Coordinates ( $\times 10^4$ ) and Equivalent Isotropic Displacement Parameters ( $\text{\AA}^2 \times 10^3$ ) for 20221228JH\_0m\_a.  $U_{\text{eq}}$  is defined as 1/3 of the trace of the orthogonalised  $U_{\text{IJ}}$  tensor.**

| Atom | x          | y          | z         | U(eq)    |
|------|------------|------------|-----------|----------|
| Br01 | 8802.8(13) | 1724.6(12) | 3282.2(8) | 52.6(6)  |
| Cl01 | 8824(6)    | 4087(6)    | 4611(4)   | 110(2)   |
| O004 | 4890(7)    | 3236(7)    | 951(3)    | 32.6(18) |
| O005 | 2528(7)    | 4173(7)    | 1631(5)   | 43(2)    |
| N006 | 6827(8)    | 4432(8)    | 1290(5)   | 31(2)    |
| O007 | 6096(10)   | 2649(8)    | -24(5)    | 53(3)    |
| N008 | 3234(8)    | 3256(8)    | 2637(4)   | 29.1(19) |
| C00B | 5511(9)    | 4591(8)    | 1648(6)   | 28(2)    |
| C00F | 7042(5)    | 2157(6)    | 3095(4)   | 35(3)    |
| C00E | 6773(5)    | 2703(6)    | 2451(3)   | 31(3)    |
| C009 | 5475(6)    | 3053(5)    | 2337(3)   | 26(2)    |
| C00A | 4444(5)    | 2858(6)    | 2867(4)   | 29(2)    |
| C00K | 4713(6)    | 2313(6)    | 3511(3)   | 35(3)    |
| C00I | 6011(7)    | 1962(5)    | 3625(3)   | 33(2)    |
| C00G | 7354(6)    | 5298(6)    | 2323(4)   | 32(2)    |
| C00C | 5958(6)    | 5147(5)    | 2344(3)   | 29(2)    |
| C00D | 5174(5)    | 5534(6)    | 2932(4)   | 37(3)    |
| C00T | 5787(7)    | 6071(6)    | 3499(4)   | 45(3)    |
| C00R | 7183(8)    | 6222(6)    | 3478(4)   | 45(3)    |
| C00V | 7967(6)    | 5836(6)    | 2890(4)   | 44(3)    |
| C00H | 1999(9)    | 3308(10)   | 3116(6)   | 34(3)    |
| C00J | 8600(11)   | 3740(10)   | 779(6)    | 36(3)    |
| C00L | 7924(10)   | 4783(9)    | 1666(6)   | 32(2)    |
| C00M | 4893(9)    | 3657(9)    | 1720(6)   | 31(2)    |
| C00O | 9066(11)   | 4384(11)   | 1331(7)   | 45(3)    |
| C00Q | 7163(10)   | 3769(10)   | 769(6)    | 35(3)    |
| C00S | 3381(10)   | 3734(8)    | 1963(5)   | 27(2)    |
| C00U | 6088(11)   | 3189(10)   | 515(6)    | 39(3)    |
| C00X | 2711(10)   | 4836(7)    | 4863(4)   | 65(5)    |
| C00N | 2641(9)    | 4073(6)    | 4387(4)   | 48(4)    |
| C00P | 2033(8)    | 4132(5)    | 3656(4)   | 35(3)    |
| C00W | 1495(9)    | 4953(7)    | 3402(4)   | 53(4)    |
| C00Y | 1565(11)   | 5716(5)    | 3879(5)   | 56(4)    |
| C00Z | 2173(11)   | 5657(6)    | 4609(5)   | 57(4)    |
| C010 | 7034(19)   | 4125(14)   | 4570(9)   | 66(5)    |
| Cl1  | 6281(5)    | 3391(3)    | 5232(2)   | 69.0(12) |



**Table 7 Anisotropic Displacement Parameters ( $\text{\AA}^2 \times 10^3$ ) for 20221228JH\_0m\_a.**  
**The Anisotropic displacement factor exponent takes the form: -**  
 **$2\pi^2[h^2a^{*2}U_{11}+2hka^*b^*U_{12}+\dots]$ .**

| Atom | $U_{11}$ | $U_{22}$ | $U_{33}$ | $U_{23}$ | $U_{13}$ | $U_{12}$ |
|------|----------|----------|----------|----------|----------|----------|
| Br01 | 25.0(6)  | 83.5(12) | 49.5(8)  | 8.8(7)   | -11.2(5) | 14.2(7)  |
| Cl01 | 66(3)    | 165(6)   | 99(4)    | 3(4)     | 32(3)    | -6(4)    |
| O004 | 19(3)    | 69(6)    | 9(3)     | 0(3)     | 3(2)     | 1(4)     |
| O005 | 15(3)    | 85(7)    | 30(4)    | 12(4)    | -2(3)    | 9(4)     |
| N006 | 9(3)     | 61(7)    | 22(4)    | 5(4)     | 4(3)     | -1(4)    |
| O007 | 45(5)    | 86(8)    | 29(4)    | -18(4)   | 8(4)     | -9(5)    |
| N008 | 17(3)    | 51(5)    | 19(3)    | 0(3)     | 4(3)     | -2(4)    |
| C00B | 12(4)    | 55(7)    | 17(4)    | 3(5)     | 4(3)     | 1(4)     |
| C00F | 24(5)    | 59(8)    | 22(5)    | 0(5)     | -4(4)    | -4(5)    |
| C00E | 12(4)    | 60(8)    | 22(4)    | 4(5)     | 1(3)     | 7(5)     |
| C009 | 17(4)    | 42(5)    | 18(3)    | 2(3)     | 5(3)     | 2(4)     |
| C00A | 10(4)    | 57(7)    | 20(4)    | -1(4)    | 3(3)     | -1(4)    |
| C00K | 22(5)    | 60(8)    | 23(5)    | 12(5)    | 4(4)     | 2(5)     |
| C00I | 38(6)    | 42(7)    | 19(4)    | 7(4)     | -2(4)    | -2(5)    |
| C00G | 18(5)    | 49(7)    | 29(5)    | 0(5)     | -2(4)    | -1(5)    |
| C00C | 15(5)    | 50(7)    | 23(4)    | 2(4)     | 2(3)     | 3(4)     |
| C00D | 24(5)    | 60(8)    | 25(5)    | -3(5)    | 0(4)     | 10(5)    |
| C00T | 42(7)    | 62(9)    | 30(6)    | -7(6)    | 3(5)     | 3(6)     |
| C00R | 53(8)    | 51(8)    | 31(6)    | -5(5)    | -10(5)   | -6(7)    |
| C00V | 28(6)    | 70(10)   | 34(6)    | -4(6)    | -10(5)   | -14(6)   |
| C00H | 12(4)    | 66(8)    | 26(5)    | 4(5)     | 6(3)     | -5(5)    |
| C00J | 18(5)    | 60(8)    | 31(5)    | 10(5)    | 8(4)     | 2(5)     |
| C00L | 12(4)    | 56(7)    | 29(5)    | 0(5)     | 0(4)     | -5(4)    |
| C00M | 9(4)     | 70(8)    | 14(4)    | 0(5)     | 0(3)     | 0(4)     |
| C00O | 14(5)    | 83(10)   | 37(6)    | 6(6)     | 8(4)     | -1(6)    |
| C00Q | 17(5)    | 70(9)    | 19(4)    | 2(5)     | 7(4)     | 2(5)     |
| C00S | 14(4)    | 43(5)    | 22(4)    | -3(4)    | 0(3)     | -2(4)    |
| C00U | 23(5)    | 74(9)    | 19(4)    | 1(5)     | 11(4)    | 2(6)     |
| C00X | 58(9)    | 108(15)  | 30(6)    | -4(8)    | -1(6)    | -8(10)   |
| C00N | 43(7)    | 77(11)   | 26(6)    | -2(6)    | -3(5)    | 5(7)     |
| C00P | 15(5)    | 65(9)    | 25(5)    | -1(5)    | 7(4)     | -3(5)    |
| C00W | 38(7)    | 89(11)   | 31(6)    | -3(7)    | 3(5)     | 17(7)    |
| C00Y | 57(9)    | 64(10)   | 49(8)    | 7(7)     | 6(6)     | 14(8)    |
| C00Z | 50(8)    | 78(11)   | 43(7)    | -12(7)   | 11(6)    | 1(8)     |
| C010 | 72(11)   | 83(13)   | 43(8)    | 12(8)    | -3(7)    | -2(10)   |
| Cl1  | 65(2)    | 99(3)    | 43.0(16) | 2.8(19)  | 3.6(16)  | -10(3)   |

**Table 8 Bond Lengths for  
20221228JH\_0m\_a.**

| Atom | Atom | Length/Å  | Atom | Atom | Length/Å  |
|------|------|-----------|------|------|-----------|
| Br01 | C00F | 1.871(5)  | C00G | C00C | 1.3900    |
| Cl01 | C010 | 1.76(2)   | C00G | C00V | 1.3900    |
| O004 | C00M | 1.456(12) | C00G | C00L | 1.469(13) |
| O004 | C00U | 1.396(11) | C00C | C00D | 1.3900    |
| O005 | C00S | 1.202(14) | C00D | C00T | 1.3900    |
| N006 | C00B | 1.450(11) | C00T | C00R | 1.3900    |
| N006 | C00L | 1.357(13) | C00R | C00V | 1.3900    |
| N006 | C00Q | 1.363(17) | C00H | C00P | 1.526(15) |
| O007 | C00U | 1.218(15) | C00J | C00O | 1.42(2)   |
| N008 | C00A | 1.384(10) | C00J | C00Q | 1.412(14) |
| N008 | C00H | 1.466(11) | C00L | C00O | 1.390(16) |
| N008 | C00S | 1.360(14) | C00M | C00S | 1.547(12) |
| C00B | C00C | 1.512(12) | C00Q | C00U | 1.426(18) |
| C00B | C00M | 1.508(17) | C00X | C00N | 1.3900    |
| C00F | C00E | 1.3900    | C00X | C00Z | 1.3900    |
| C00F | C00I | 1.3900    | C00N | C00P | 1.3900    |
| C00E | C009 | 1.3900    | C00P | C00W | 1.3900    |
| C009 | C00A | 1.3900    | C00W | C00Y | 1.3900    |
| C009 | C00M | 1.495(12) | C00Y | C00Z | 1.3900    |
| C00A | C00K | 1.3900    | C010 | Cl1  | 1.733(17) |
| C00K | C00I | 1.3900    |      |      |           |

**Table 8 Bond Angles for 20221228JH\_0m\_a.**

| Atom | Atom | Atom | Angle/°  | Atom | Atom | Atom | Angle/°   |
|------|------|------|----------|------|------|------|-----------|
| C00U | O004 | C00M | 120.2(8) | C00R | C00V | C00G | 120.0     |
| C00L | N006 | C00B | 116.5(9) | N008 | C00H | C00P | 111.3(9)  |
| C00L | N006 | C00Q | 113.0(9) | C00Q | C00J | C00O | 108.1(11) |
| C00Q | N006 | C00B | 127.5(9) | N006 | C00L | C00G | 105.0(8)  |
| C00A | N008 | C00H | 125.0(8) | N006 | C00L | C00O | 106.5(10) |
| C00S | N008 | C00A | 111.7(7) | C00O | C00L | C00G | 147.3(10) |
| C00S | N008 | C00H | 122.5(9) | O004 | C00M | C00B | 108.3(8)  |
| N006 | C00B | C00C | 99.3(7)  | O004 | C00M | C009 | 112.8(10) |
| N006 | C00B | C00M | 104.2(9) | O004 | C00M | C00S | 105.8(7)  |
| C00M | C00B | C00C | 123.1(8) | C00B | C00M | C00S | 110.0(10) |
| C00E | C00F | Br01 | 120.5(4) | C009 | C00M | C00B | 116.5(8)  |
| C00E | C00F | C00I | 120.0    | C009 | C00M | C00S | 102.7(7)  |
| C00I | C00F | Br01 | 119.4(4) | C00L | C00O | C00J | 107.3(10) |
| C009 | C00E | C00F | 120.0    | N006 | C00Q | C00J | 104.8(11) |
| C00E | C009 | C00A | 120.0    | N006 | C00Q | C00U | 116.7(9)  |
| C00E | C009 | C00M | 132.1(5) | C00J | C00Q | C00U | 136.5(13) |

**Table 8 Bond Angles for 20221228JH\_0m\_a.**

| Atom Atom Atom | Angle/°  | Atom Atom Atom | Angle/°   |
|----------------|----------|----------------|-----------|
| C00A C009 C00M | 107.9(5) | O005 C00S N008 | 127.3(9)  |
| N008 C00A C009 | 110.6(5) | O005 C00S C00M | 125.6(10) |
| N008 C00A C00K | 129.4(5) | N008 C00S C00M | 107.0(8)  |
| C009 C00A C00K | 120.0    | O004 C00U C00Q | 115.5(10) |
| C00I C00K C00A | 120.0    | O007 C00U O004 | 116.3(11) |
| C00K C00I C00F | 120.0    | O007 C00U C00Q | 128.2(10) |
| C00C C00G C00V | 120.0    | C00N C00X C00Z | 120.0     |
| C00C C00G C00L | 108.2(6) | C00P C00N C00X | 120.0     |
| C00V C00G C00L | 131.7(6) | C00N C00P C00H | 120.4(7)  |
| C00G C00C C00B | 110.6(5) | C00N C00P C00W | 120.0     |
| C00D C00C C00B | 129.3(5) | C00W C00P C00H | 119.5(7)  |
| C00D C00C C00G | 120.0    | C00Y C00W C00P | 120.0     |
| C00T C00D C00C | 120.0    | C00W C00Y C00Z | 120.0     |
| C00R C00T C00D | 120.0    | C00Y C00Z C00X | 120.0     |
| C00V C00R C00T | 120.0    | Cl1 C010 Cl01  | 112.3(10) |

**Table 9 Torsion Angles for 20221228JH\_0m\_a.**

| A B C D             | Angle/°    | A B C D             | Angle/°    |
|---------------------|------------|---------------------|------------|
| Br01 C00F C00E C009 | -177.1(6)  | C00C C00G C00L C00O | -158.2(19) |
| Br01 C00F C00I C00K | 177.1(6)   | C00C C00D C00T C00R | 0.0        |
| O004 C00M C00S O005 | -62.7(16)  | C00D C00T C00R C00V | 0.0        |
| O004 C00M C00S N008 | 120.6(10)  | C00T C00R C00V C00G | 0.0        |
| N006 C00B C00C C00G | 2.9(9)     | C00V C00G C00C C00B | 176.7(8)   |
| N006 C00B C00C C00D | 179.2(7)   | C00V C00G C00C C00D | 0.0        |
| N006 C00B C00M O004 | -55.1(9)   | C00V C00G C00L N006 | -176.7(7)  |
| N006 C00B C00M C009 | 73.4(10)   | C00V C00G C00L C00O | 19(3)      |
| N006 C00B C00M C00S | -170.3(7)  | C00H N008 C00A C009 | -170.1(10) |
| N006 C00L C00O C00J | -3.8(14)   | C00H N008 C00A C00K | 11.3(15)   |
| N006 C00Q C00U O004 | -13.5(16)  | C00H N008 C00S O005 | -7.8(19)   |
| N006 C00Q C00U O007 | 168.1(13)  | C00H N008 C00S C00M | 168.8(10)  |
| N008 C00A C00K C00I | 178.5(10)  | C00H C00P C00W C00Y | -177.7(8)  |
| N008 C00H C00P C00N | -87.3(10)  | C00J C00Q C00U O004 | 147.8(13)  |
| N008 C00H C00P C00W | 90.4(9)    | C00J C00Q C00U O007 | -31(2)     |
| C00B N006 C00L C00G | -4.3(14)   | C00L N006 C00B C00C | 1.1(13)    |
| C00B N006 C00L C00O | 166.8(11)  | C00L N006 C00B C00M | -126.7(11) |
| C00B N006 C00Q C00J | -163.4(10) | C00L N006 C00Q C00J | -4.1(14)   |
| C00B N006 C00Q C00U | 3.3(17)    | C00L N006 C00Q C00U | 162.7(11)  |
| C00B C00C C00D C00T | -176.0(9)  | C00L C00G C00C C00B | -5.5(9)    |
| C00B C00M C00S O005 | 54.1(14)   | C00L C00G C00C C00D | 177.8(8)   |

**Table 9 Torsion Angles for 20221228JH\_0m\_a.**

| A    | B    | C    | D    | Angle/°    | A    | B    | C    | D    | Angle/°    |
|------|------|------|------|------------|------|------|------|------|------------|
| C00B | C00M | C00S | N008 | -122.6(10) | C00L | C00G | C00V | C00R | -177.1(10) |
| C00F | C00E | C009 | C00A | 0.0        | C00M | O004 | C00U | O007 | 162.8(12)  |
| C00F | C00E | C009 | C00M | 179.0(10)  | C00M | O004 | C00U | C00Q | -15.8(17)  |
| C00E | C00F | C00I | C00K | 0.0        | C00M | C00B | C00C | C00G | 116.7(8)   |
| C00E | C009 | C00A | N008 | -178.8(8)  | C00M | C00B | C00C | C00D | -66.9(12)  |
| C00E | C009 | C00A | C00K | 0.0        | C00M | C009 | C00A | N008 | 2.0(8)     |
| C00E | C009 | C00M | O004 | 65.0(11)   | C00M | C009 | C00A | C00K | -179.2(7)  |
| C00E | C009 | C00M | C00B | -61.3(12)  | C00O | C00J | C00Q | N006 | 1.5(14)    |
| C00E | C009 | C00M | C00S | 178.4(7)   | C00O | C00J | C00Q | C00U | -161.2(13) |
| C009 | C00A | C00K | C00I | 0.0        | C00Q | N006 | C00B | C00C | 159.8(10)  |
| C009 | C00M | C00S | O005 | 178.8(11)  | C00Q | N006 | C00B | C00M | 32.1(13)   |
| C009 | C00M | C00S | N008 | 2.2(12)    | C00Q | N006 | C00L | C00G | -166.1(9)  |
| C00A | N008 | C00H | C00P | 85.3(14)   | C00Q | N006 | C00L | C00O | 5.0(14)    |
| C00A | N008 | C00S | O005 | -177.7(11) | C00Q | C00J | C00O | C00L | 1.4(15)    |
| C00A | N008 | C00S | C00M | -1.1(13)   | C00S | N008 | C00A | C009 | -0.5(11)   |
| C00A | C009 | C00M | O004 | -115.9(7)  | C00S | N008 | C00A | C00K | -179.2(7)  |
| C00A | C009 | C00M | C00B | 117.9(7)   | C00S | N008 | C00H | C00P | -83.2(12)  |
| C00A | C009 | C00M | C00S | -2.5(9)    | C00U | O004 | C00M | C00B | 52.8(13)   |
| C00A | C00K | C00I | C00F | 0.0        | C00U | O004 | C00M | C009 | -77.8(13)  |
| C00I | C00F | C00E | C009 | 0.0        | C00U | O004 | C00M | C00S | 170.7(11)  |
| C00G | C00C | C00D | C00T | 0.0        | C00X | C00N | C00P | C00H | 177.7(8)   |
| C00G | C00L | C00O | C00J | 160.2(18)  | C00X | C00N | C00P | C00W | 0.0        |
| C00C | C00B | C00M | O004 | -166.5(8)  | C00N | C00X | C00Z | C00Y | 0.0        |
| C00C | C00B | C00M | C009 | -38.0(12)  | C00N | C00P | C00W | C00Y | 0.0        |
| C00C | C00B | C00M | C00S | 78.3(10)   | C00P | C00W | C00Y | C00Z | 0.0        |
| C00C | C00G | C00V | C00R | 0.0        | C00W | C00Y | C00Z | C00X | 0.0        |
| C00C | C00G | C00L | N006 | 5.9(11)    | C00Z | C00X | C00N | C00P | 0.0        |

**Table 10 Hydrogen Atom Coordinates ( $\text{\AA} \times 10^4$ ) and Isotropic Displacement Parameters ( $\text{\AA}^2 \times 10^3$ ) for 20221228JH\_0m\_a.**

| Atom | x       | y       | z       | U(eq) |
|------|---------|---------|---------|-------|
| H00B | 4950.08 | 4965.98 | 1301.4  | 33    |
| H00E | 7462.7  | 2832.96 | 2096.03 | 38    |
| H00K | 4023.4  | 2182.46 | 3866.05 | 42    |
| H00I | 6190.99 | 1597.36 | 4056.02 | 39    |
| H00D | 4240.25 | 5432.79 | 2946.49 | 44    |
| H00T | 5262.46 | 6330.14 | 3892.73 | 54    |
| H00R | 7592.86 | 6582.21 | 3857.43 | 54    |
| H00V | 8901.06 | 5936.93 | 2875.89 | 53    |
| H00A | 1916.89 | 2759.59 | 3425.56 | 41    |

**Table 10 Hydrogen Atom Coordinates ( $\text{\AA}\times 10^4$ ) and Isotropic Displacement Parameters ( $\text{\AA}^2\times 10^3$ ) for 20221228JH\_0m\_a.**

| <b>Atom</b> | <b><i>x</i></b> | <b><i>y</i></b> | <b><i>z</i></b> | <b>U(eq)</b> |
|-------------|-----------------|-----------------|-----------------|--------------|
| H00C        | 1208.46         | 3347.54         | 2778.36         | 41           |
| H00F        | 8956.41         | 3883.44         | 265.63          | 44           |
| H00G        | 8909.11         | 3136.7          | 922.14          | 44           |
| H00O        | 9969.07         | 4515.72         | 1448.33         | 54           |
| H00X        | 3118.35         | 4796.23         | 5352.31         | 78           |
| H00N        | 3001.72         | 3523.46         | 4556.86         | 58           |
| H00W        | 1087.67         | 4992.65         | 2913.04         | 63           |
| H00Y        | 1204.29         | 6265.43         | 3708.48         | 68           |
| H00Z        | 2219.63         | 6167.24         | 4928.11         | 68           |
| H01A        | 6731.77         | 4739.96         | 4677.57         | 79           |
| H01B        | 6738.63         | 3967.87         | 4047.15         | 79           |

## 10. $^1\text{H}$ NMR, $^{13}\text{C}$ NMR and $^{19}\text{F}$ NMR spectra.

$^1\text{H}$  NMR spectrum **3a** in  $\text{CDCl}_3$  (400 MHz)

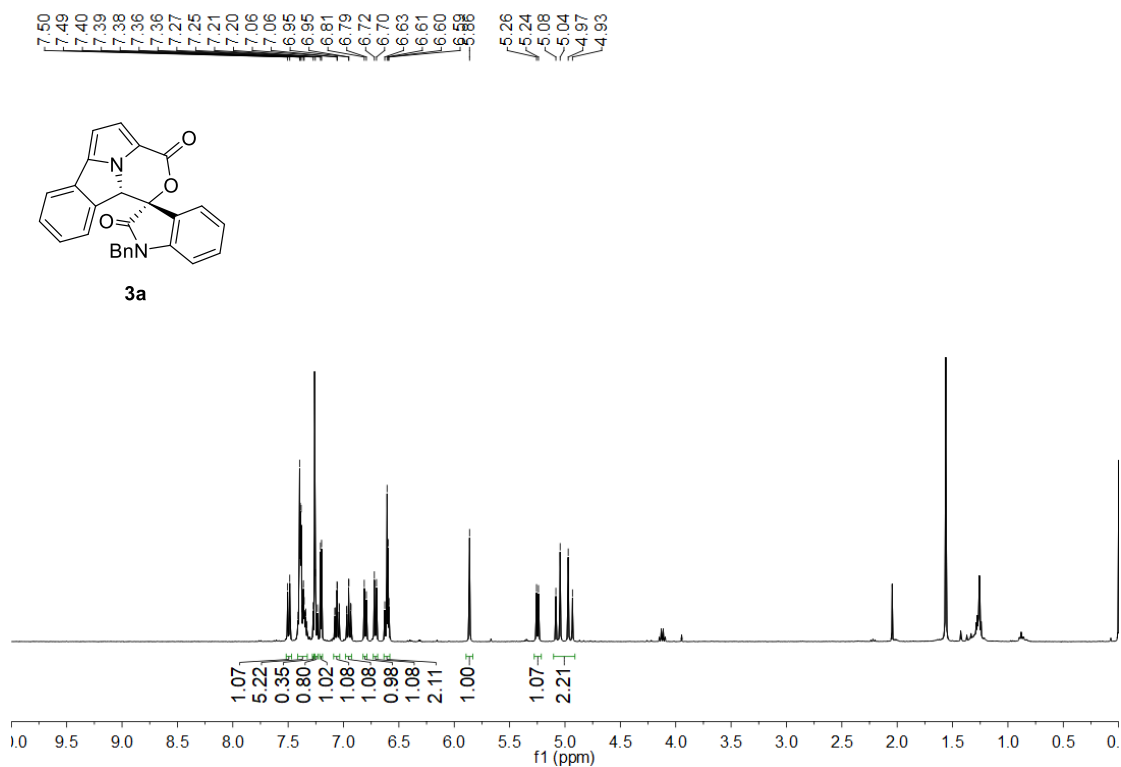

$^{13}\text{C}$  NMR spectrum **3a** in  $\text{CDCl}_3$  (101 MHz)

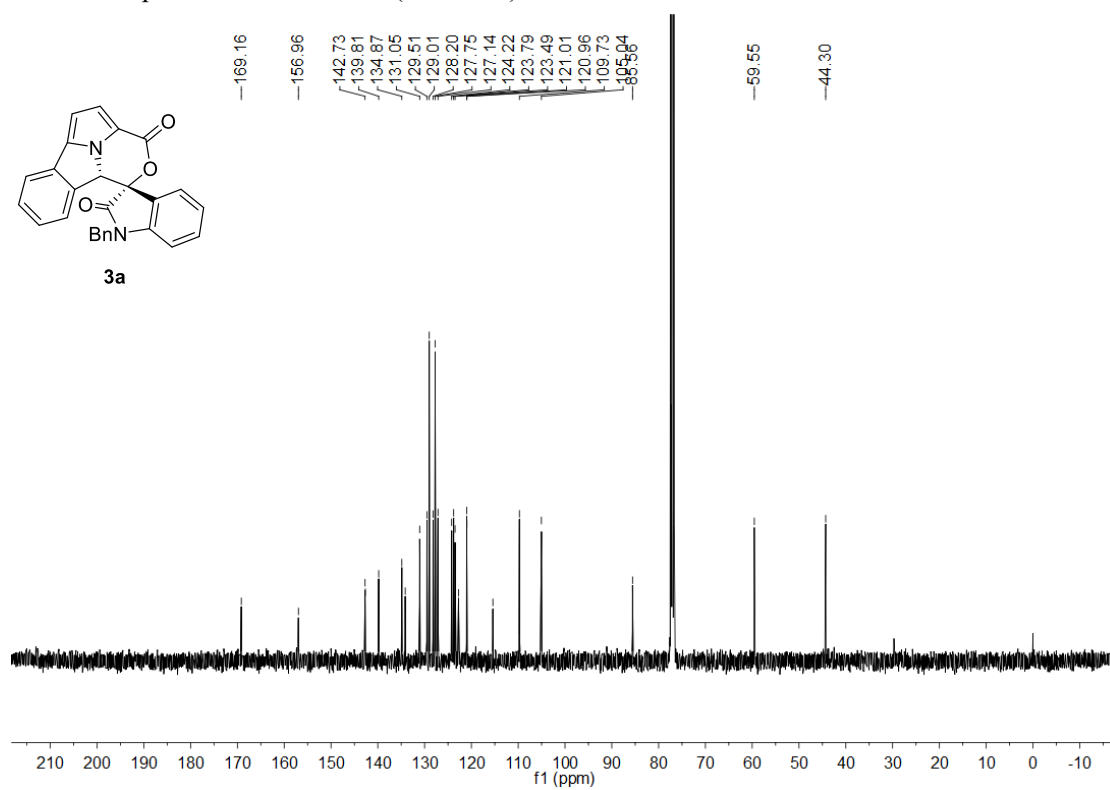

<sup>1</sup>H NMR spectrum **3b** in CD<sub>2</sub>Cl<sub>2</sub> (400 MHz)

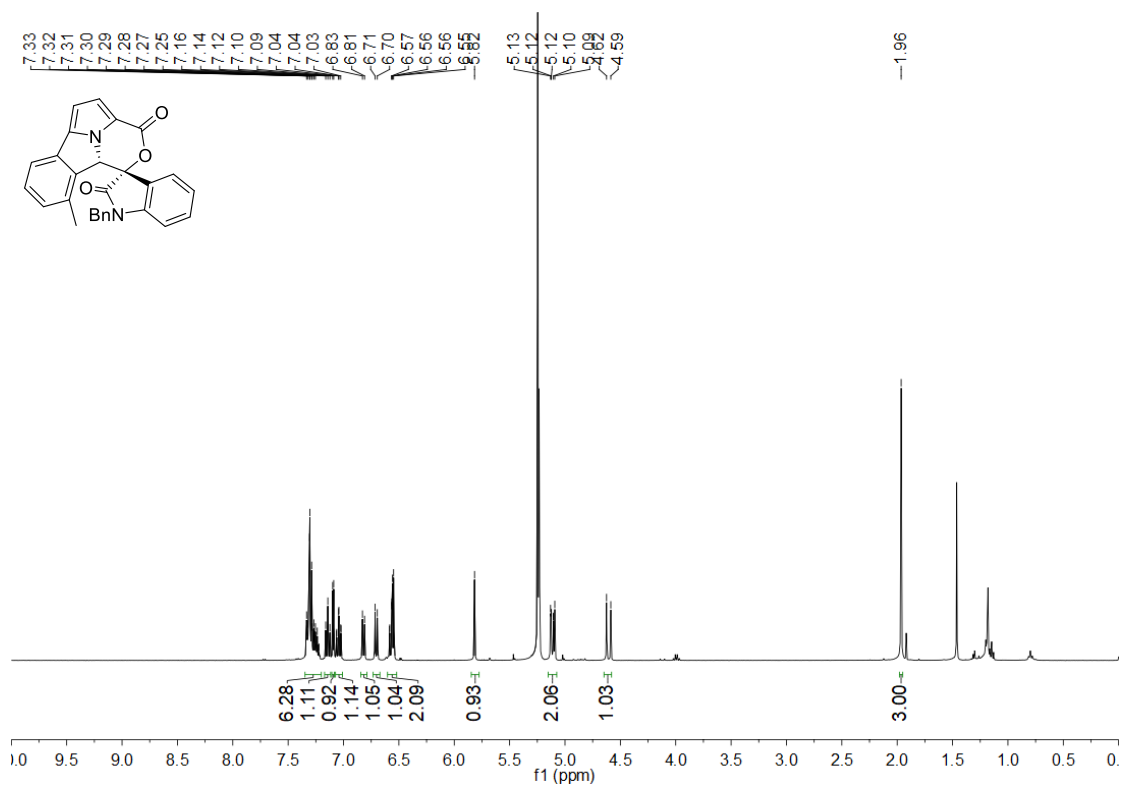

<sup>13</sup>C NMR spectrum **3b** in CD<sub>2</sub>Cl<sub>2</sub> (101 MHz)

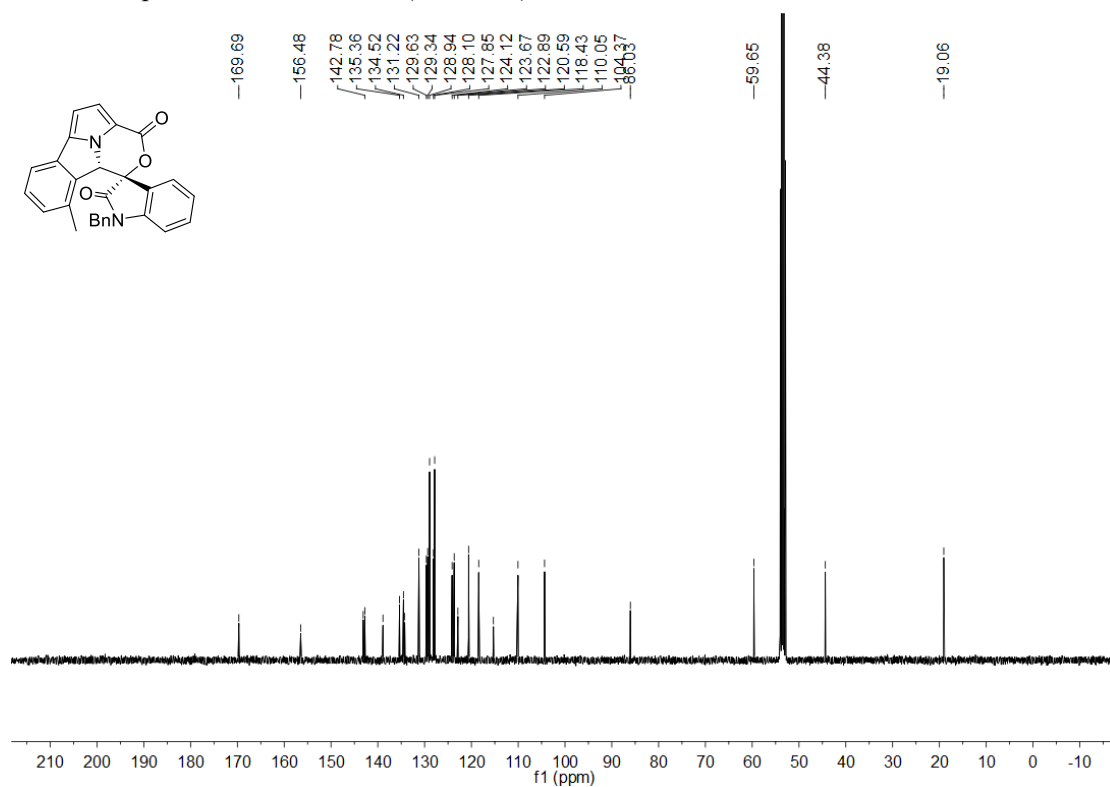

<sup>1</sup>H NMR spectrum **3c** in CD<sub>2</sub>Cl<sub>2</sub> (400 MHz)

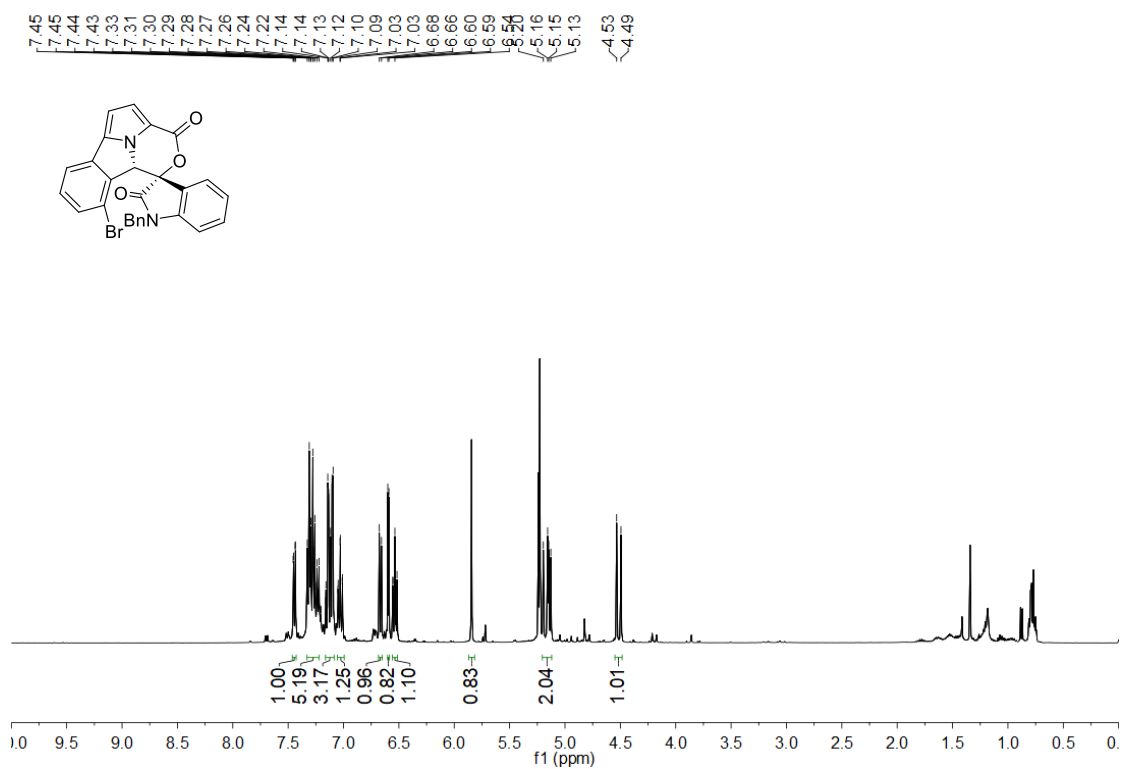

<sup>13</sup>C NMR spectrum **3c** in CD<sub>2</sub>Cl<sub>2</sub> (101 MHz)

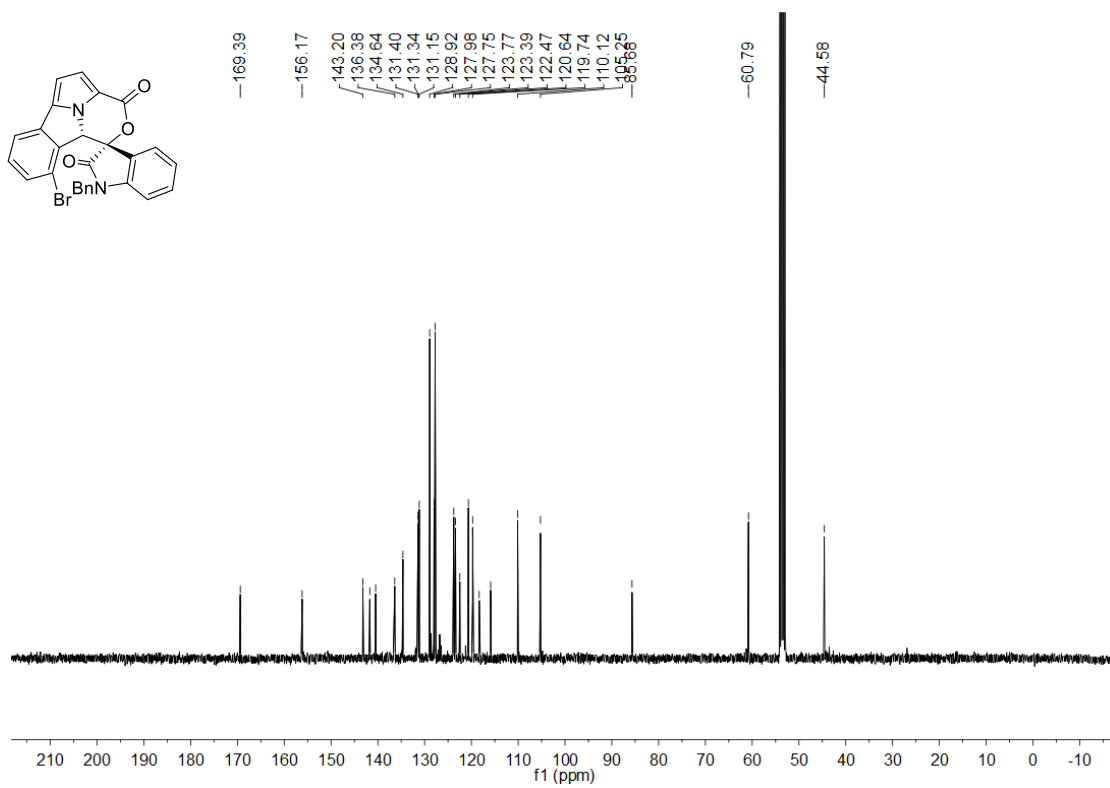



<sup>1</sup>H NMR spectrum **3d** in CD<sub>2</sub>Cl<sub>2</sub> (400 MHz)

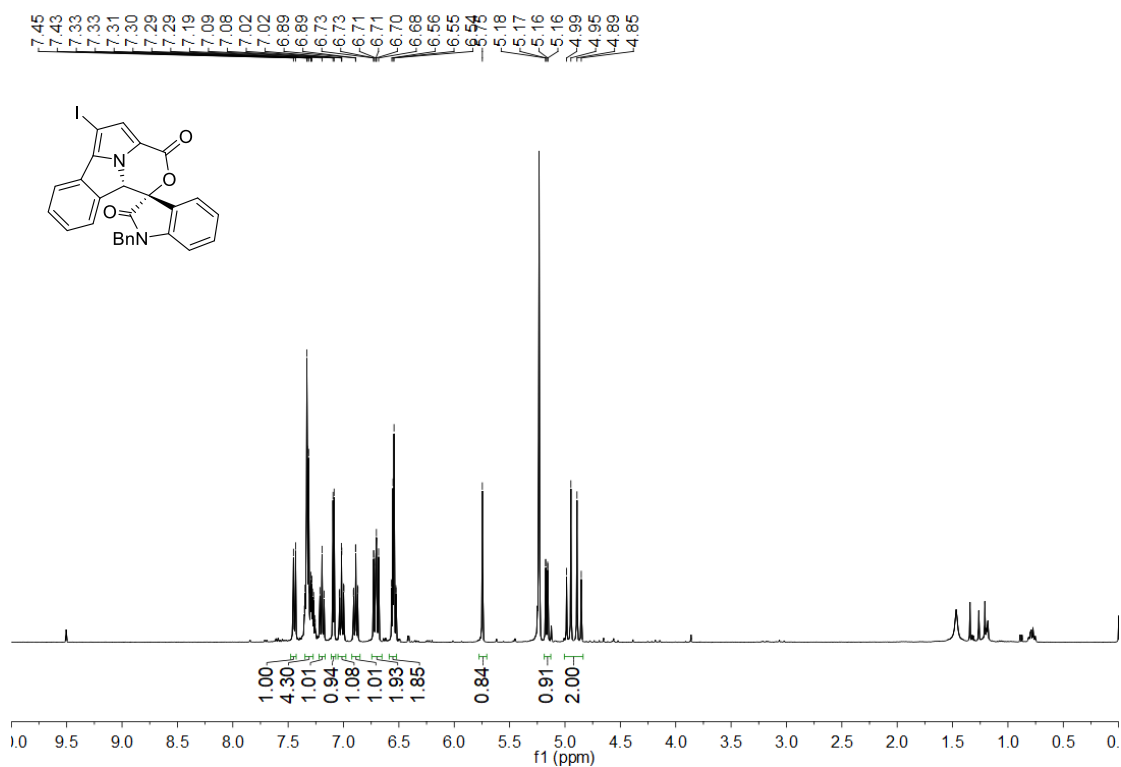

<sup>13</sup>C NMR spectrum **3d** in CDCl<sub>3</sub> (101 MHz)

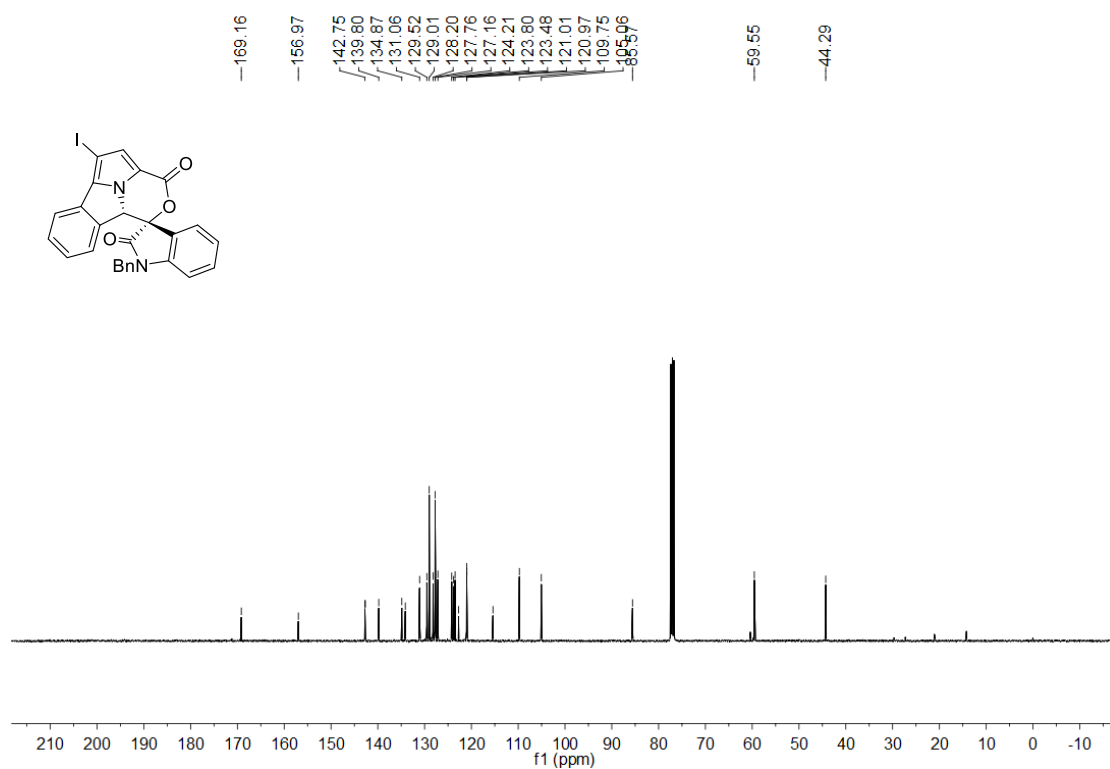

<sup>1</sup>H NMR spectrum **3e** in CD<sub>2</sub>Cl<sub>2</sub> (400 MHz)

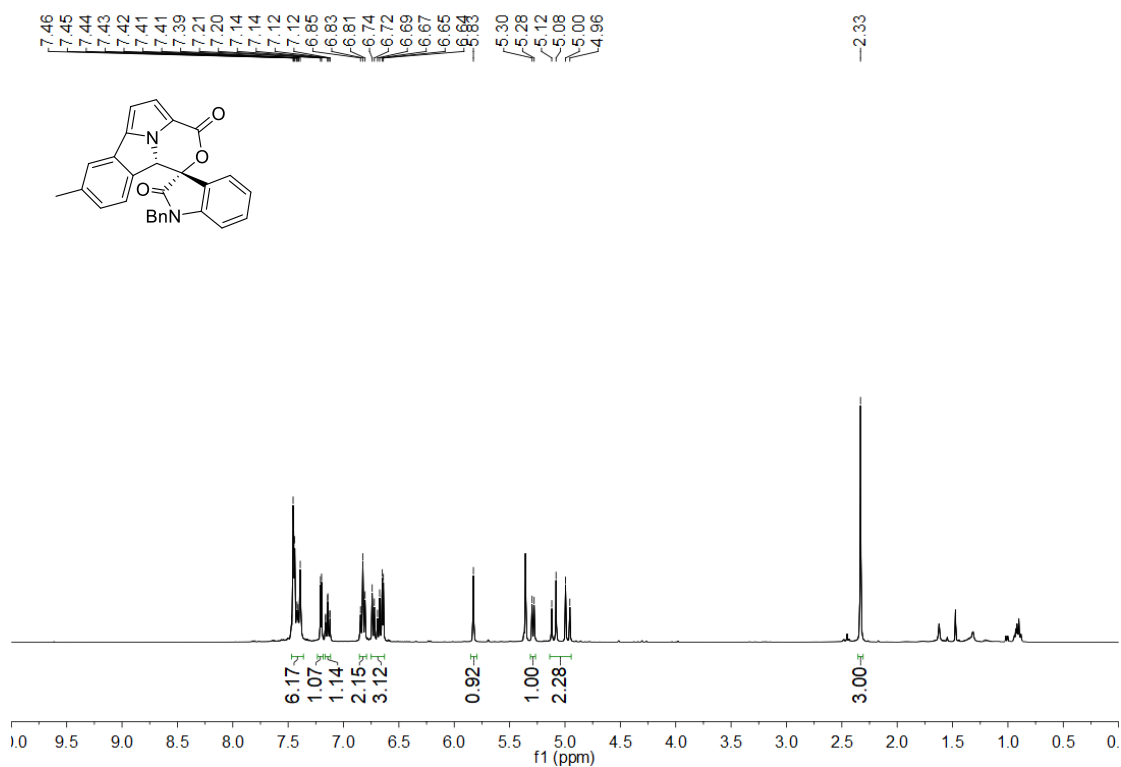

<sup>13</sup>C NMR spectrum **3e** in CD<sub>2</sub>Cl<sub>2</sub> (101 MHz)

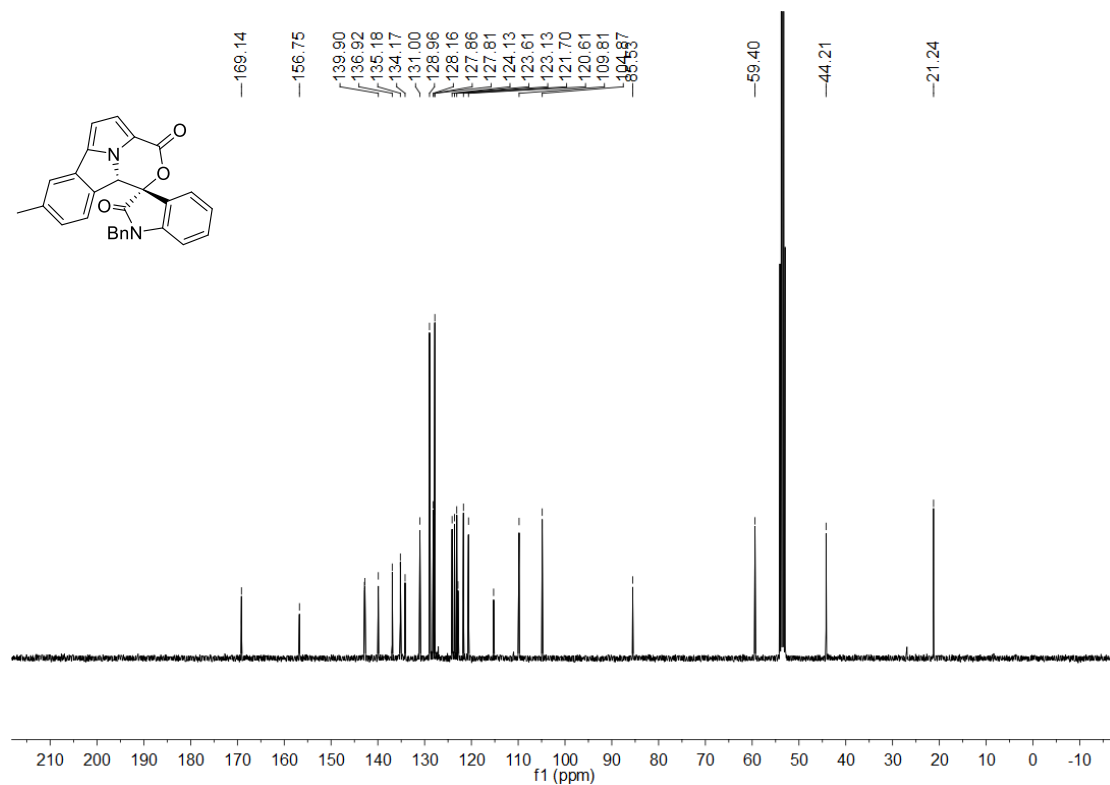

**<sup>1</sup>H NMR spectrum 3f in CD<sub>2</sub>Cl<sub>2</sub> (400 MHz)**

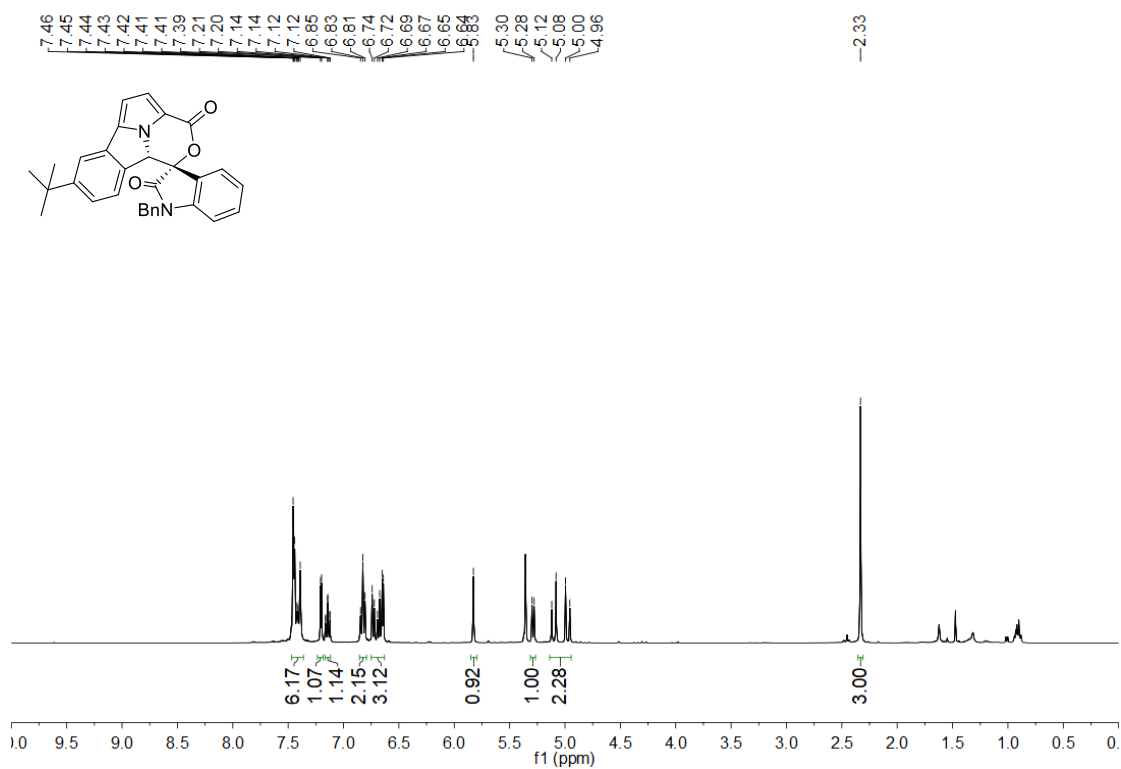

**<sup>13</sup>C NMR spectrum 3f in CD<sub>2</sub>Cl<sub>2</sub> (101 MHz)**

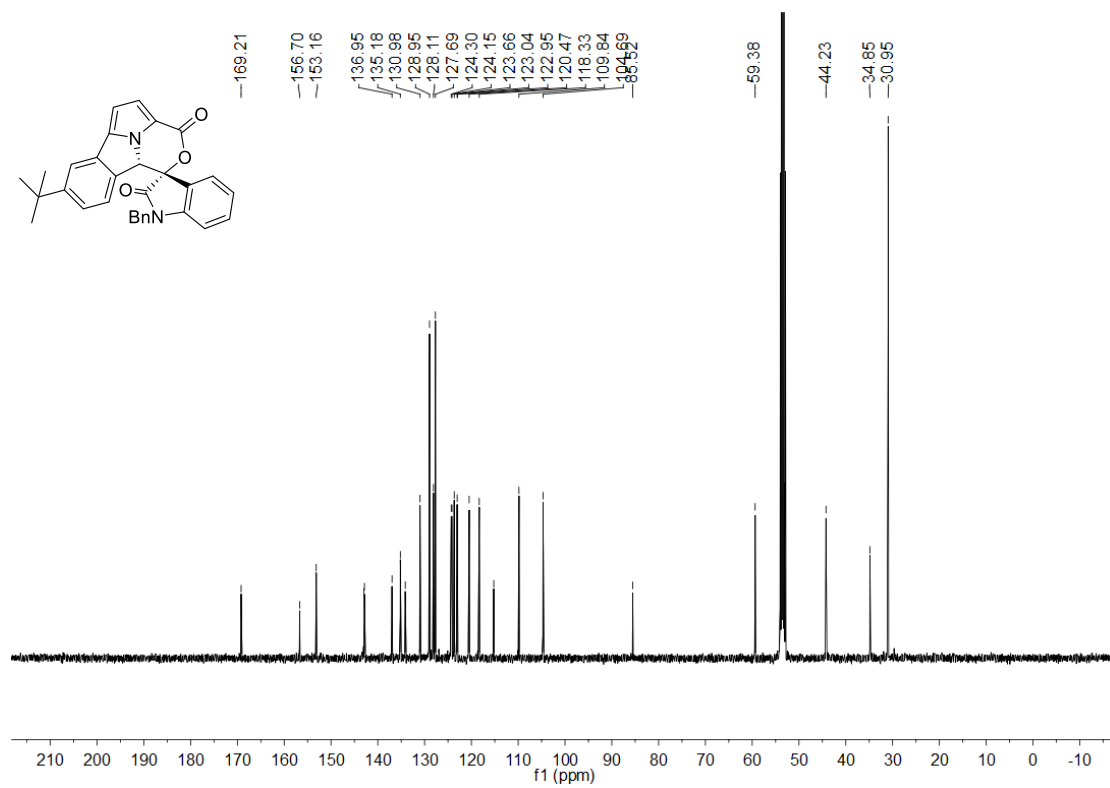

**<sup>1</sup>H NMR spectrum 3g in CD<sub>2</sub>Cl<sub>2</sub> (400 MHz)**

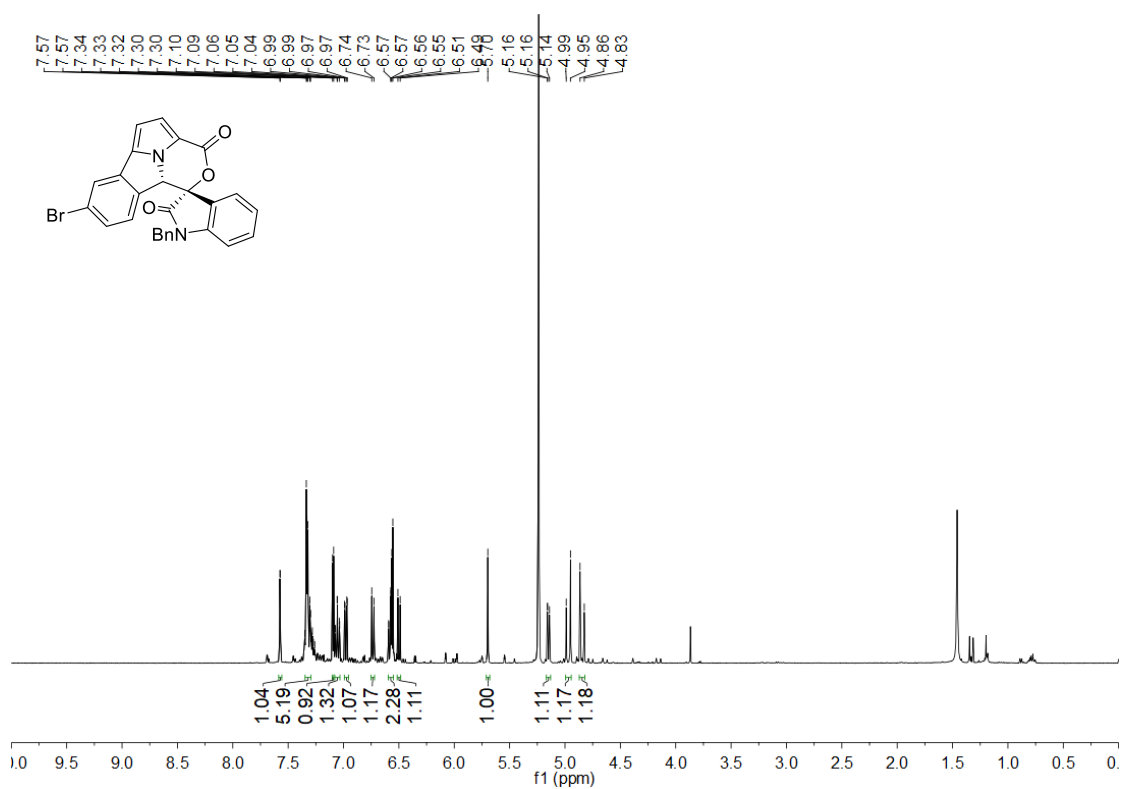

**<sup>13</sup>C NMR spectrum 3g in CD<sub>2</sub>Cl<sub>2</sub> (101 MHz)**

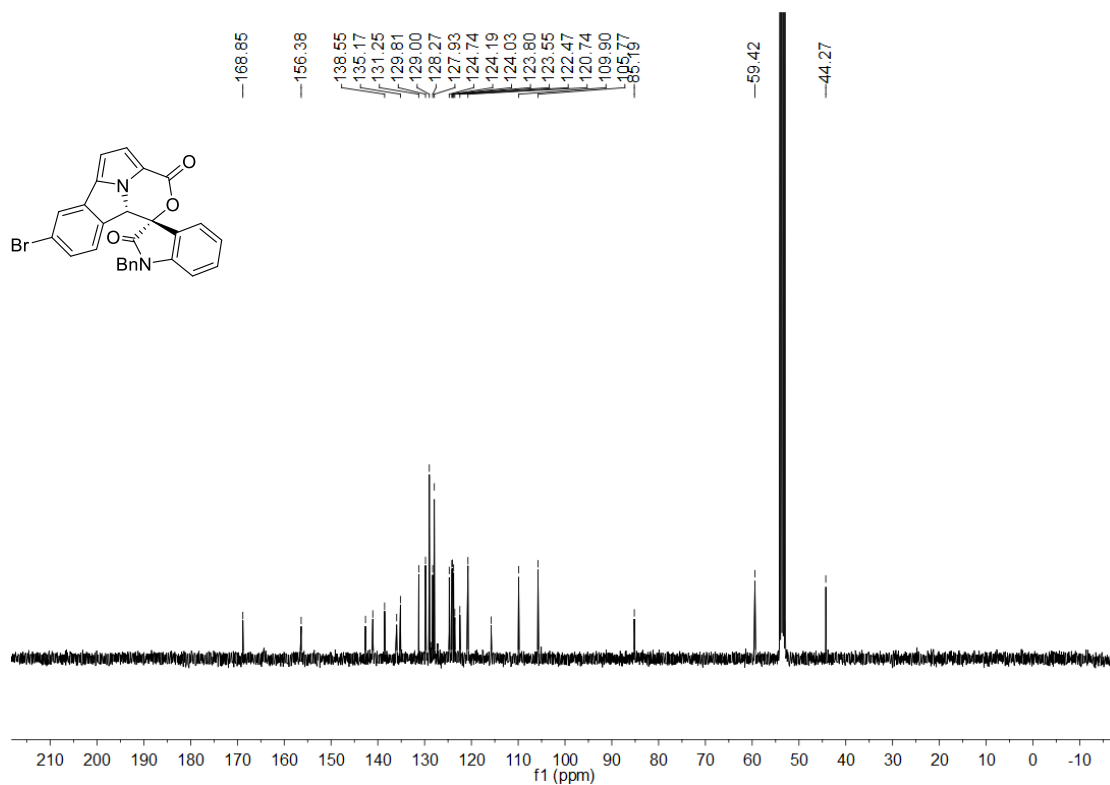

<sup>1</sup>H NMR spectrum **3h** in CD<sub>2</sub>Cl<sub>2</sub> (400 MHz)

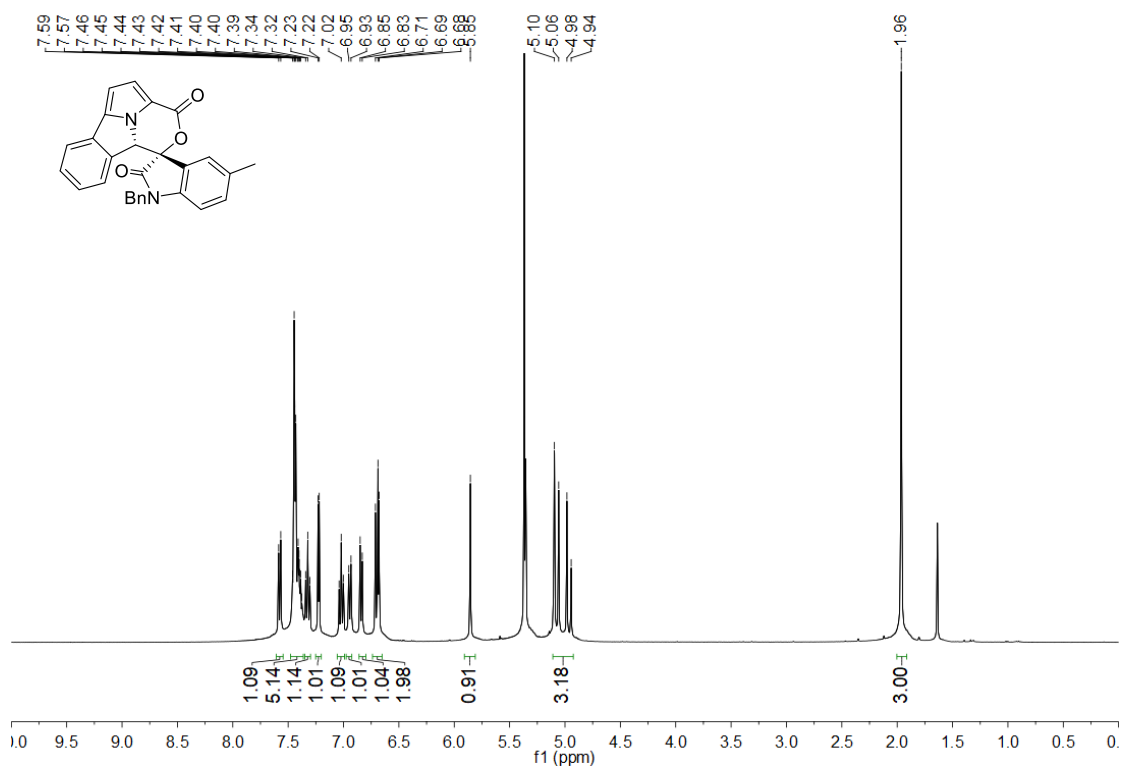

<sup>13</sup>C NMR spectrum **3h** in CD<sub>2</sub>Cl<sub>2</sub> (101 MHz)

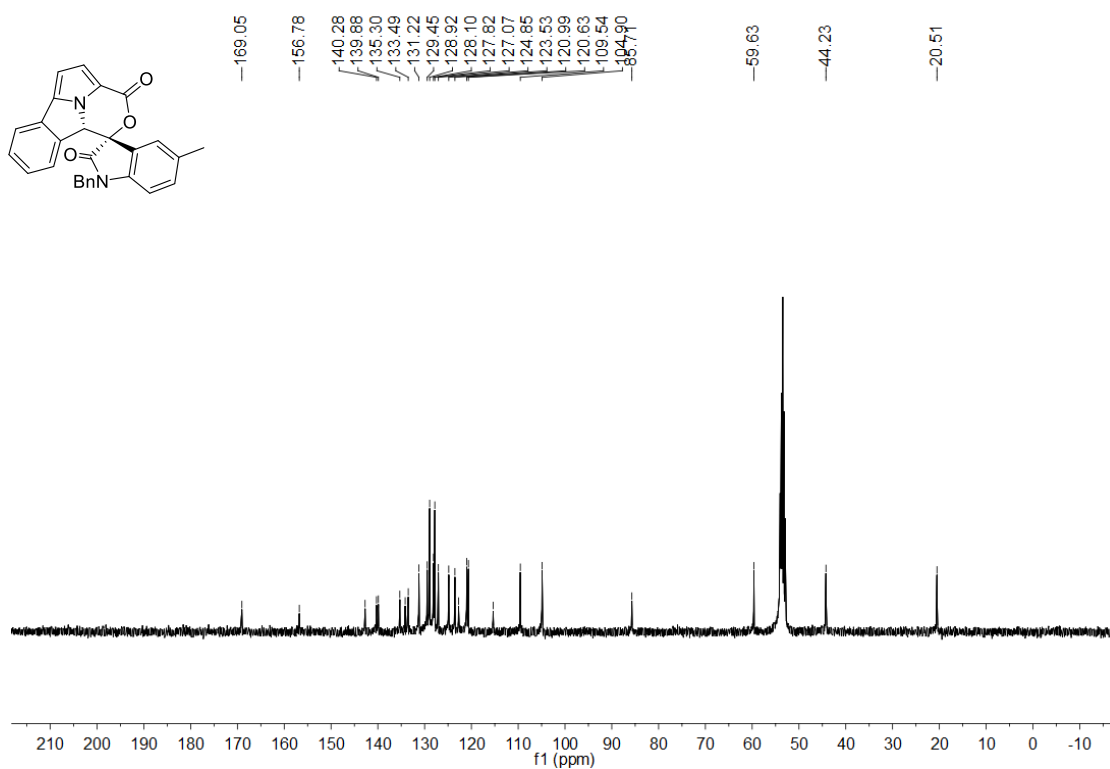

<sup>1</sup>H NMR spectrum **3i** in CD<sub>2</sub>Cl<sub>2</sub> (400 MHz)

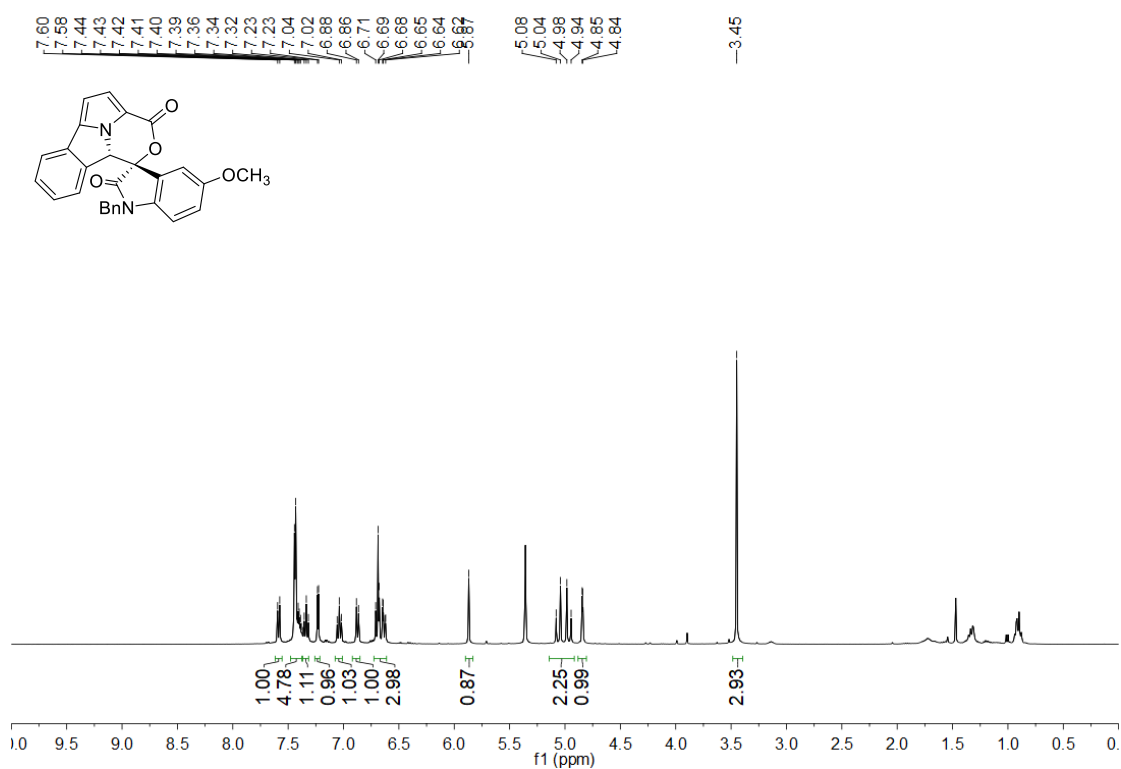

<sup>13</sup>C NMR spectrum **3i** in CDCl<sub>3</sub> (101 MHz)

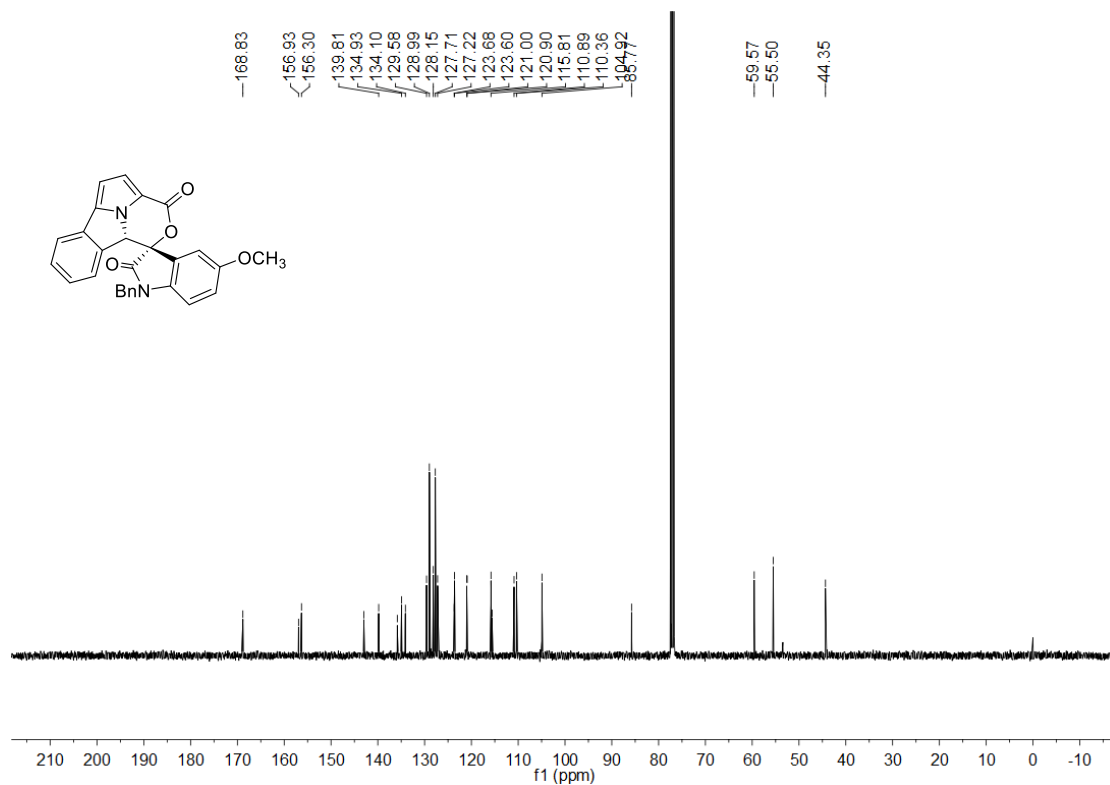

<sup>1</sup>H NMR spectrum **3j** in CD<sub>2</sub>Cl<sub>2</sub> (400 MHz)

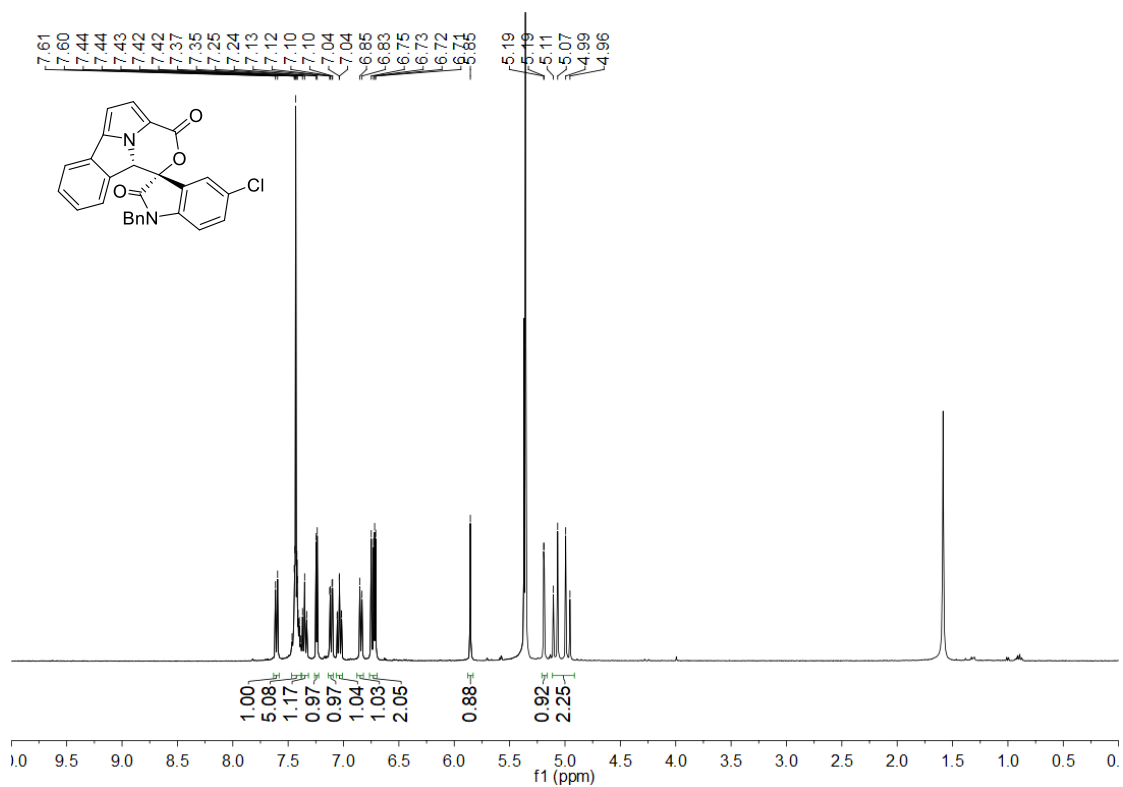

<sup>13</sup>C NMR spectrum **3j** in CD<sub>2</sub>Cl<sub>2</sub> (101 MHz)

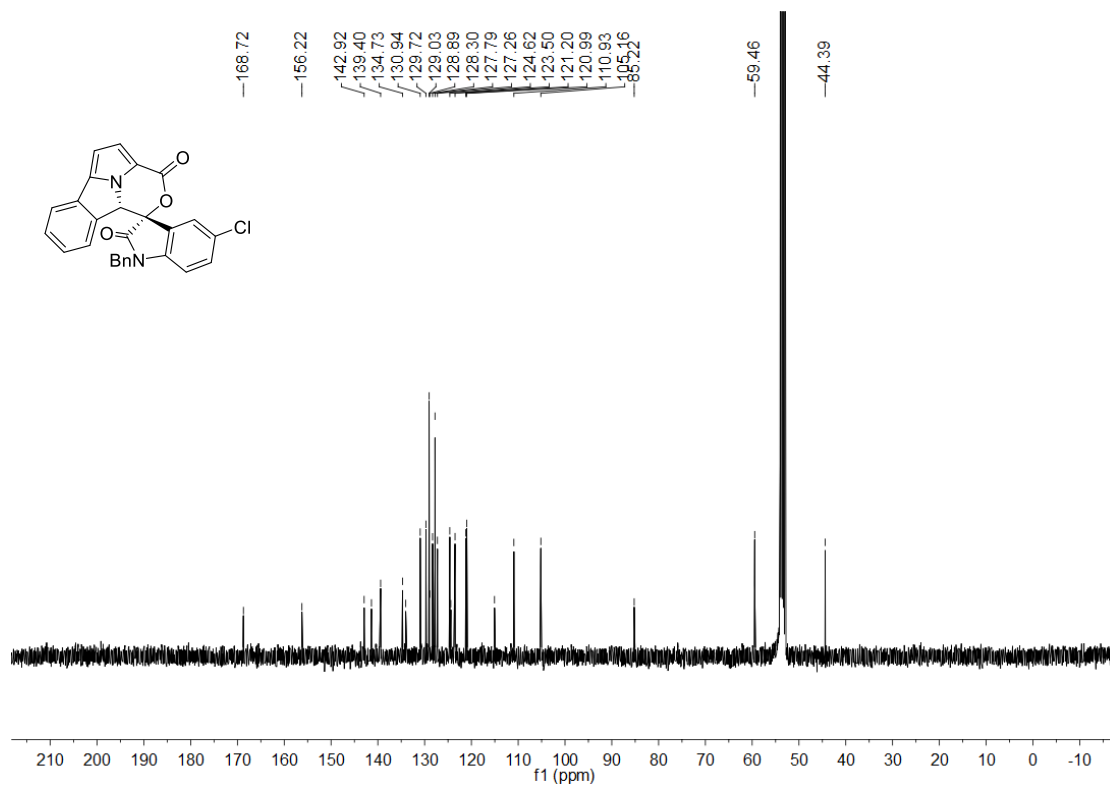

<sup>1</sup>H NMR spectrum **3k** in CD<sub>2</sub>Cl<sub>2</sub> (400 MHz)

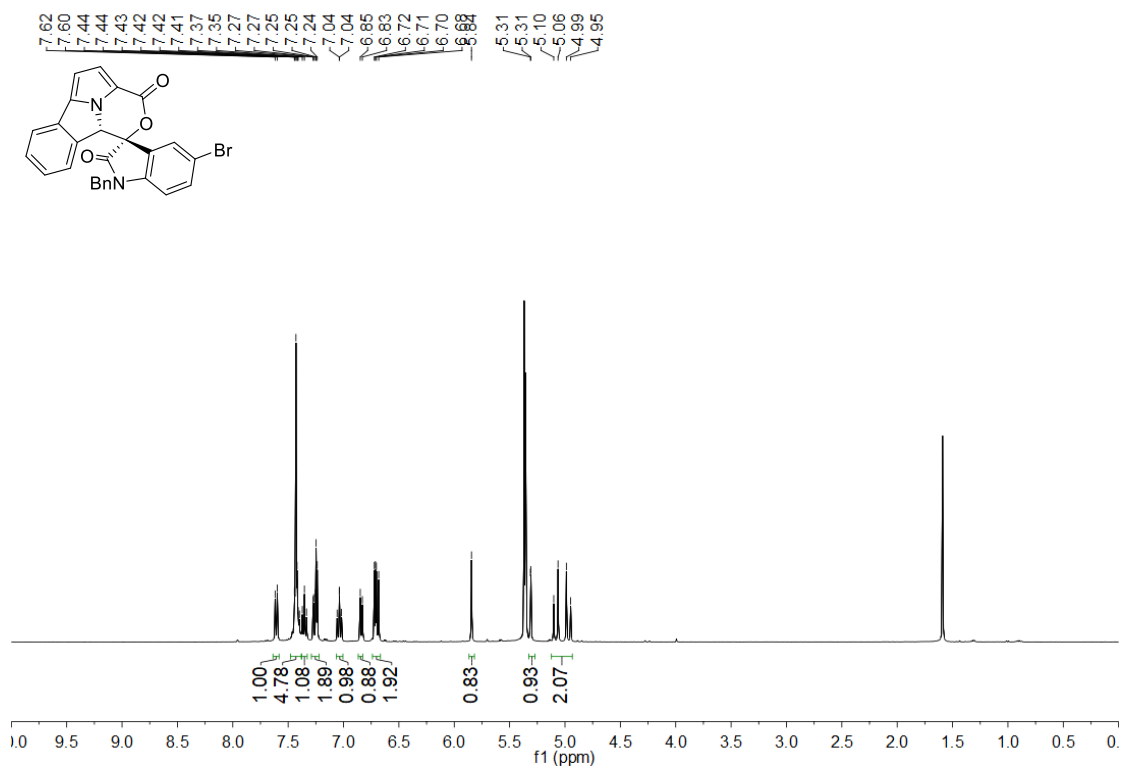

<sup>13</sup>C NMR spectrum **3k** in CD<sub>2</sub>Cl<sub>2</sub> (101 MHz)

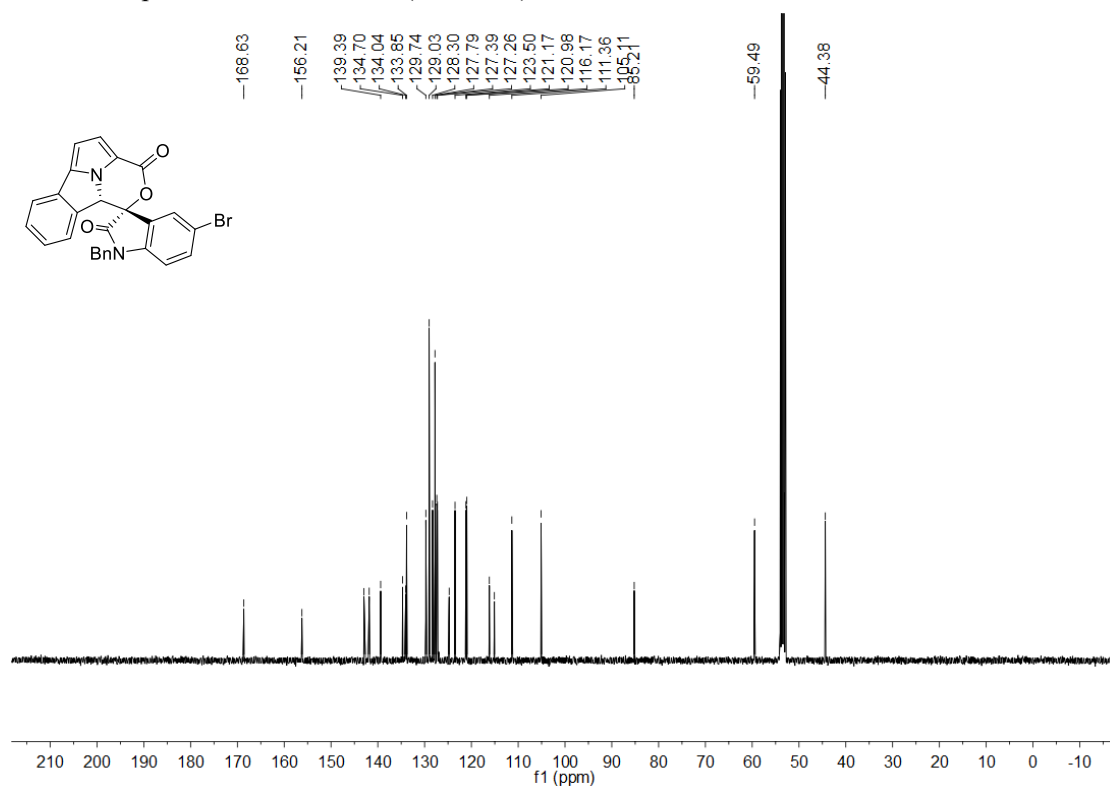



<sup>1</sup>H NMR spectrum **31** in CD<sub>2</sub>Cl<sub>2</sub> (400 MHz)

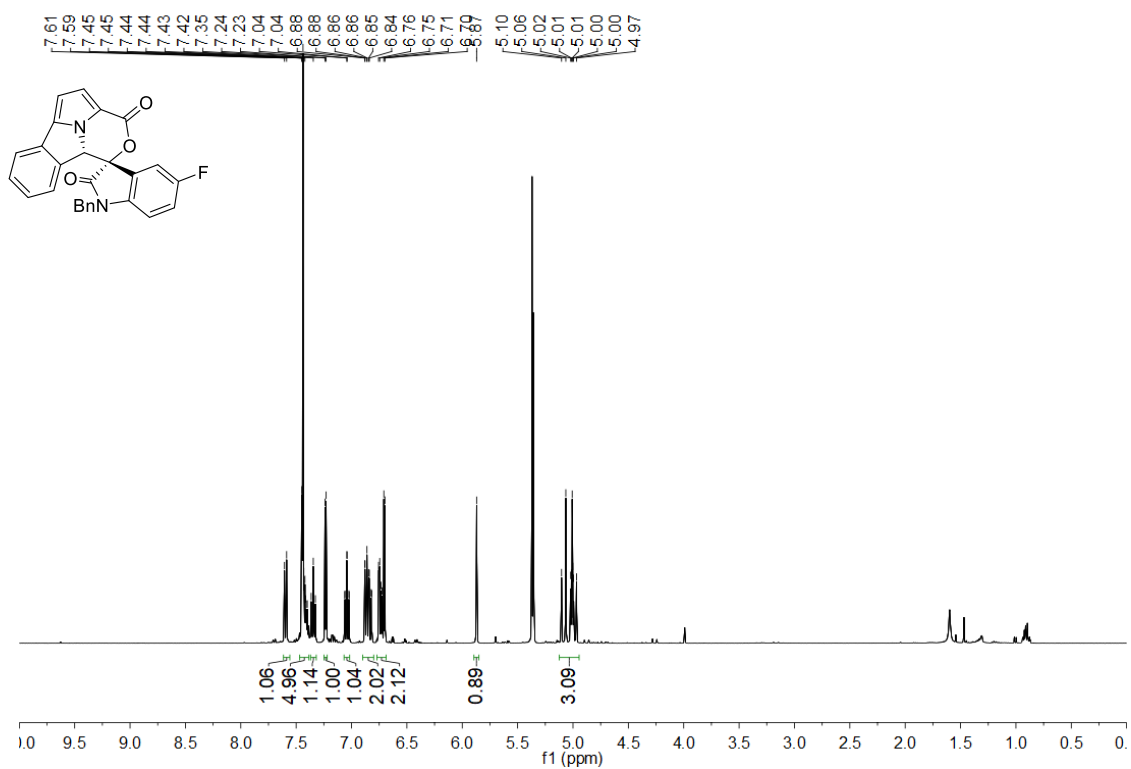

<sup>13</sup>C NMR spectrum **31** in CD<sub>2</sub>Cl<sub>2</sub> (101 MHz)

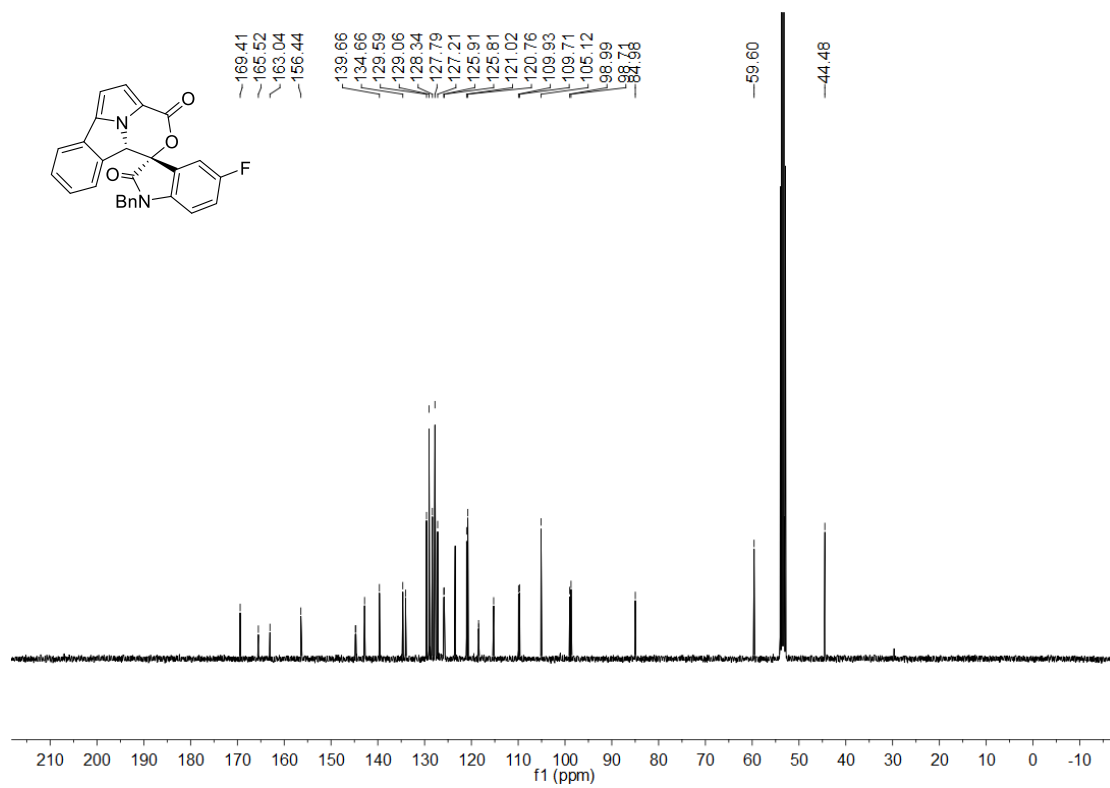

**<sup>19</sup>F NMR spectrum 3I in CD<sub>2</sub>Cl<sub>2</sub> (377 MHz)**

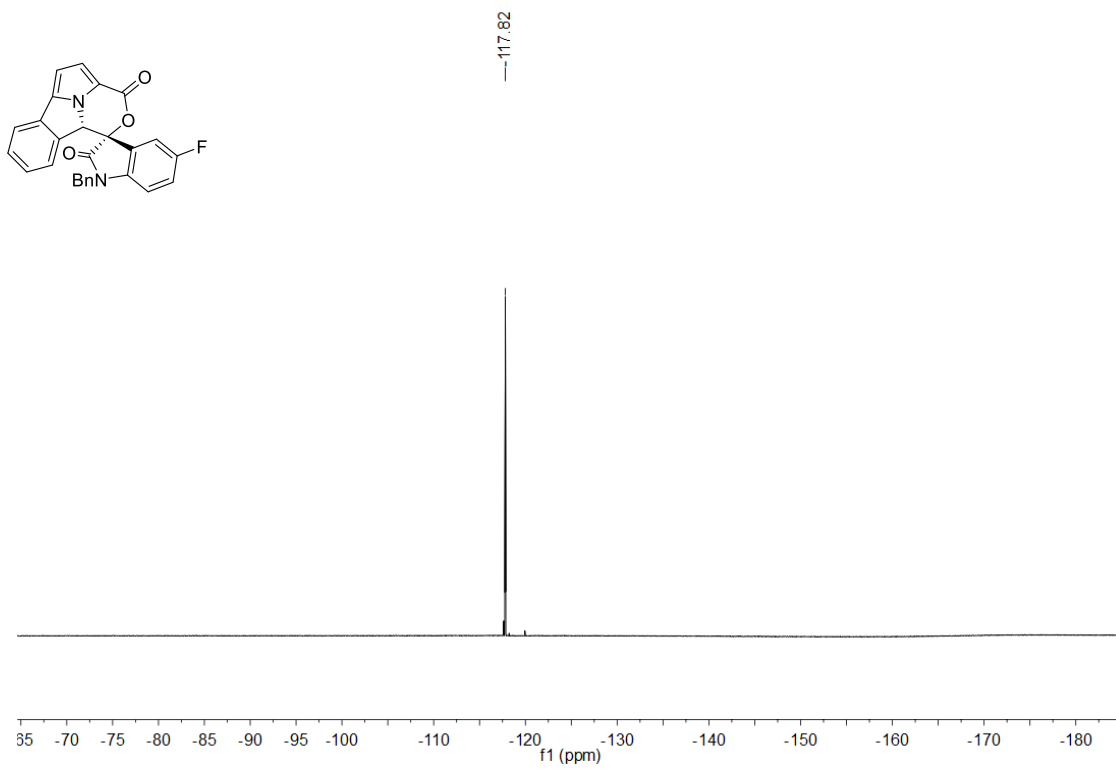

<sup>1</sup>H NMR spectrum **3m** in CD<sub>2</sub>Cl<sub>2</sub> (400 MHz)

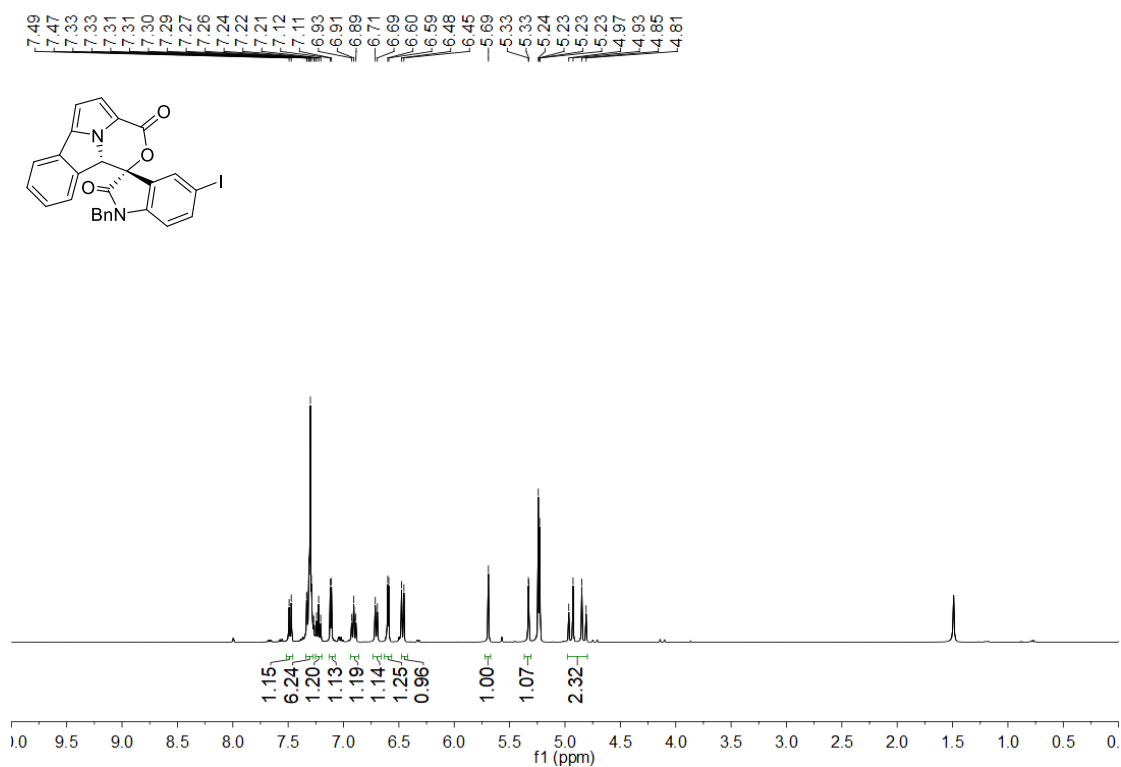

<sup>13</sup>C NMR spectrum **3m** in CD<sub>2</sub>Cl<sub>2</sub> (101 MHz)

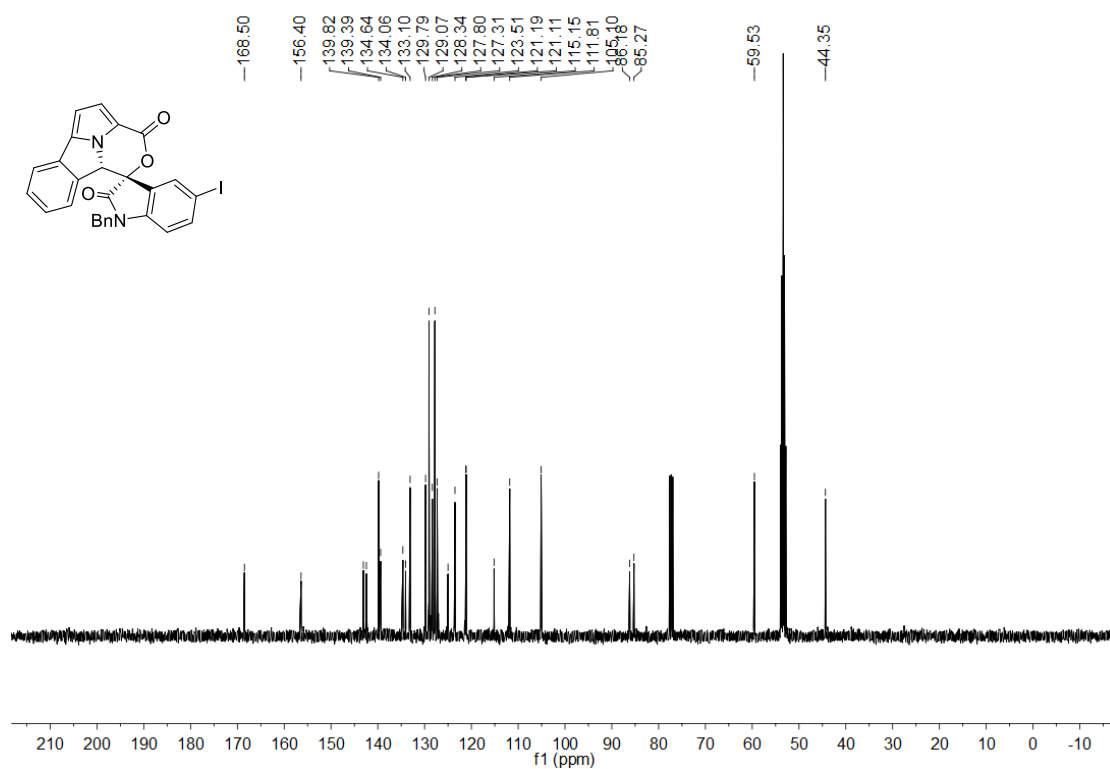

**<sup>1</sup>H NMR spectrum 3n in CD<sub>2</sub>Cl<sub>2</sub> (400 MHz)**

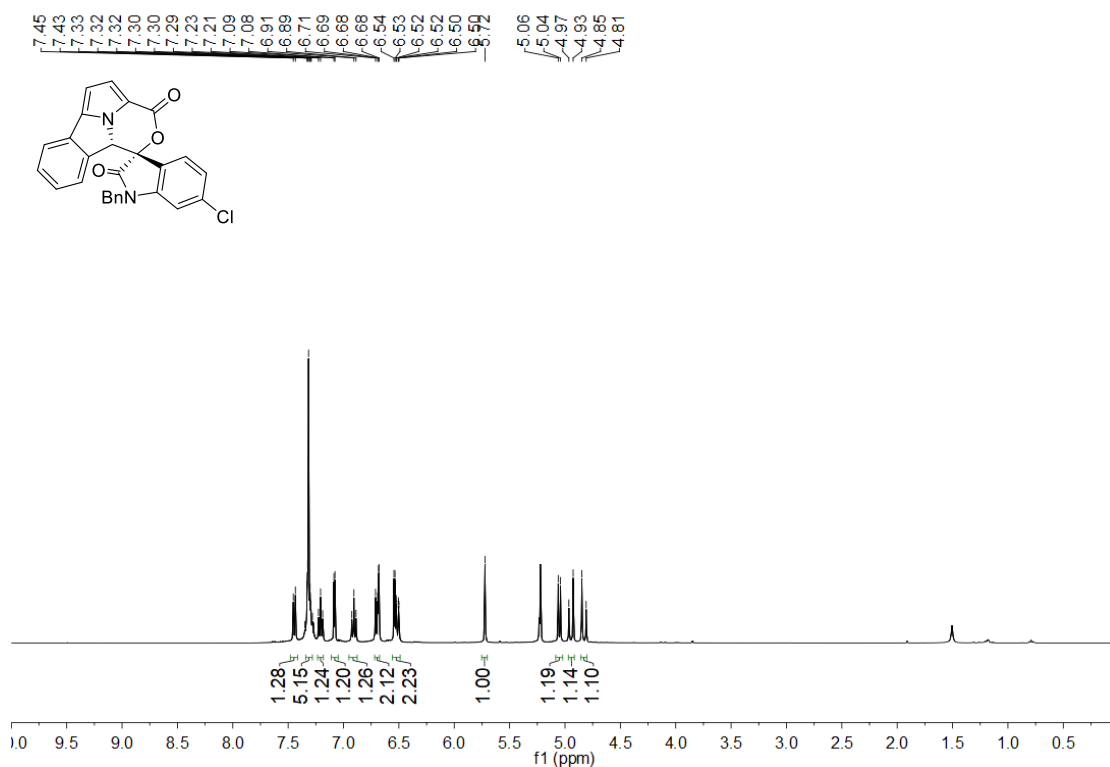

**<sup>13</sup>C NMR spectrum 3n in CD<sub>2</sub>Cl<sub>2</sub> (101 MHz)**

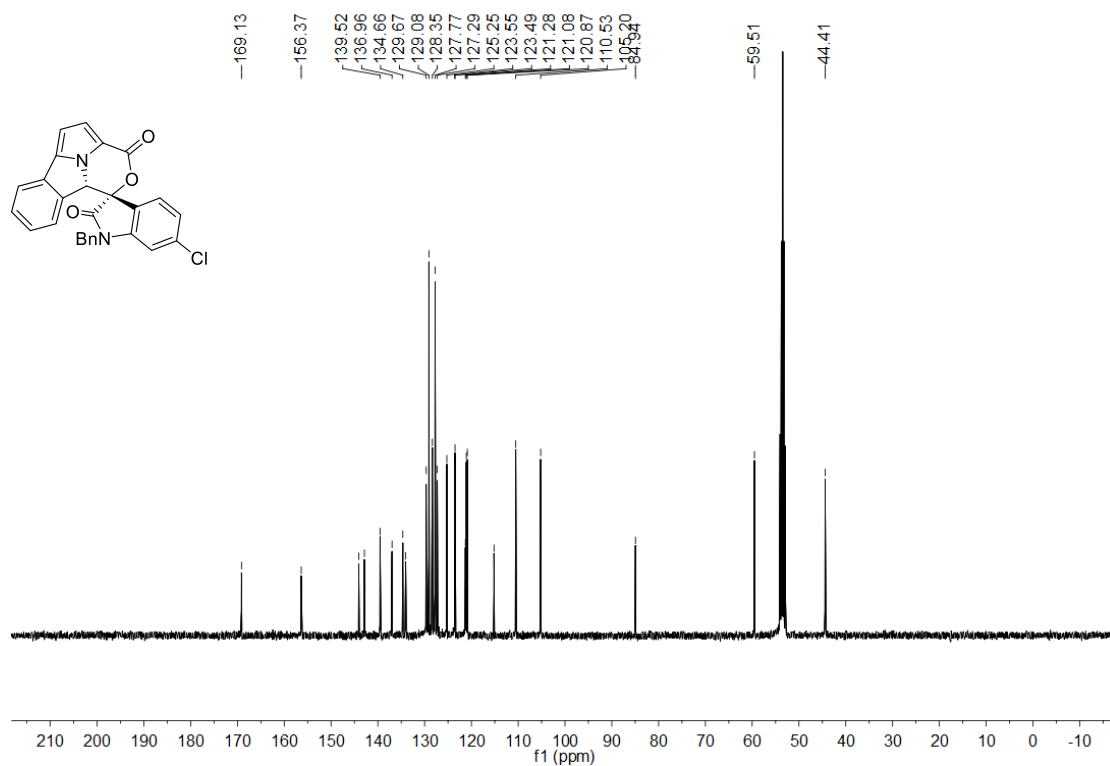

<sup>1</sup>H NMR spectrum **3o** in CD<sub>2</sub>Cl<sub>2</sub> (400 MHz)

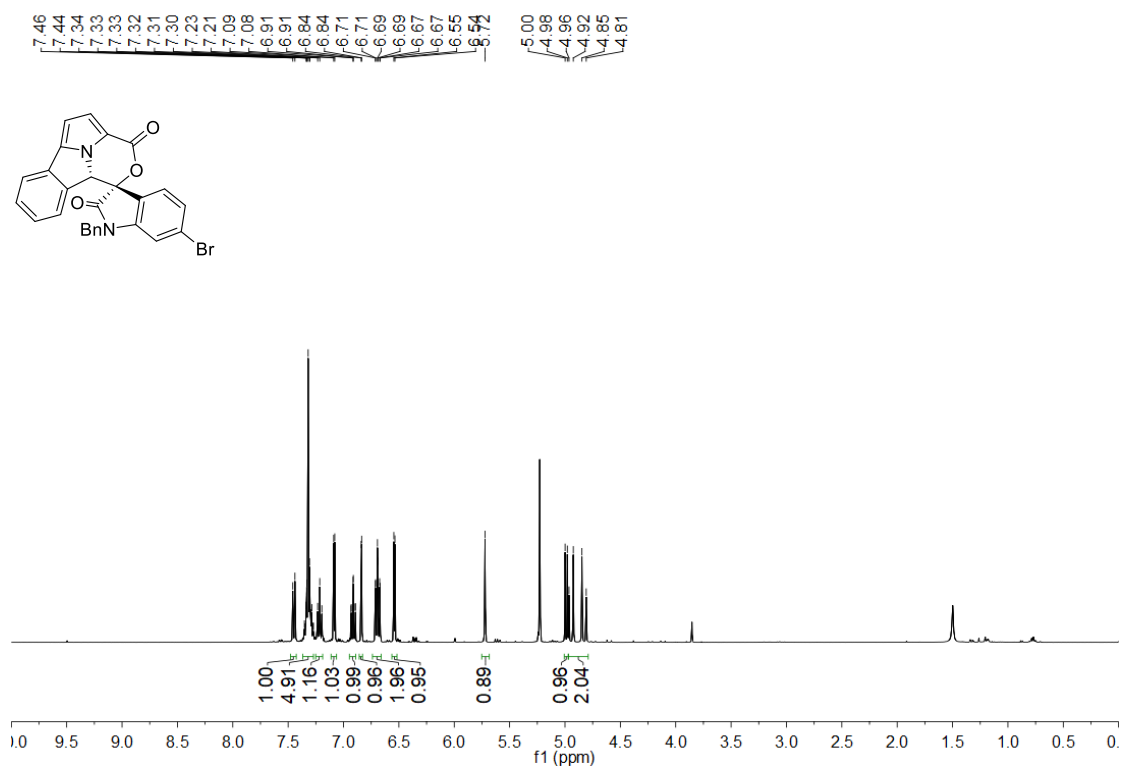

<sup>13</sup>C NMR spectrum **3o** in CD<sub>2</sub>Cl<sub>2</sub> (101 MHz)

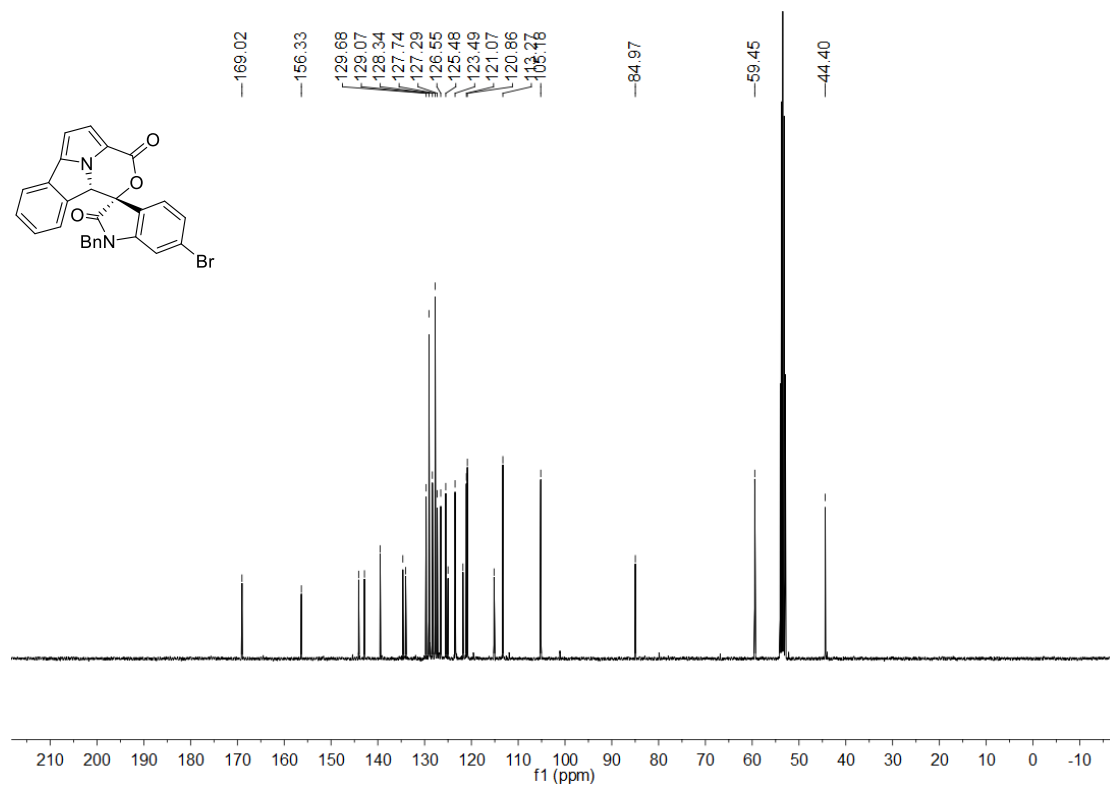

<sup>1</sup>H NMR spectrum **3p** in CD<sub>2</sub>Cl<sub>2</sub> (400 MHz)

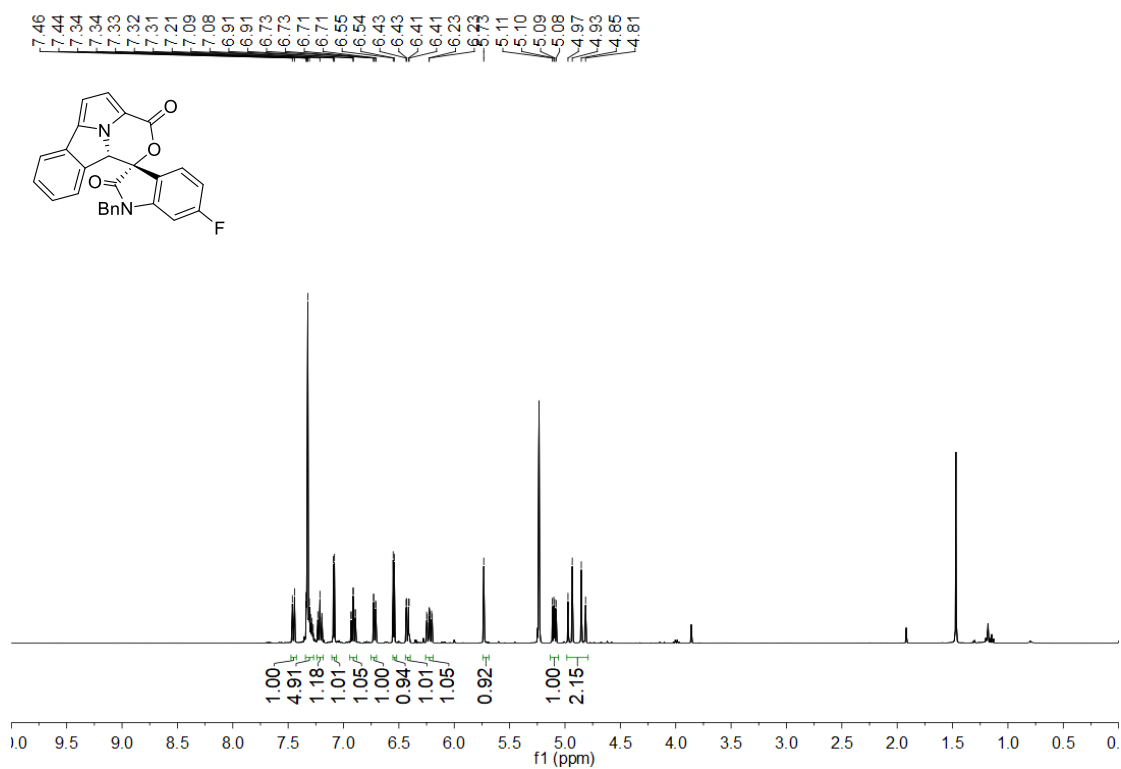

<sup>13</sup>C NMR spectrum **3p** in CD<sub>2</sub>Cl<sub>2</sub> (101 MHz)

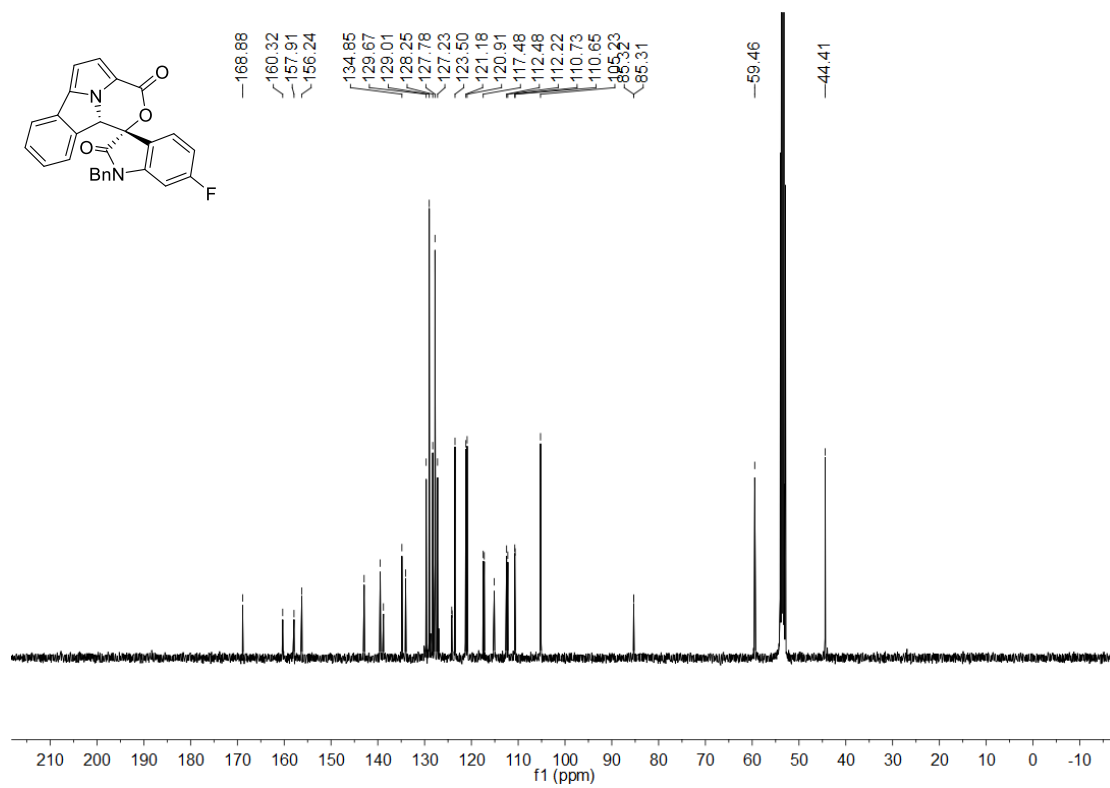

<sup>19</sup>F NMR spectrum **3p** in CDCl<sub>3</sub> (377 MHz)

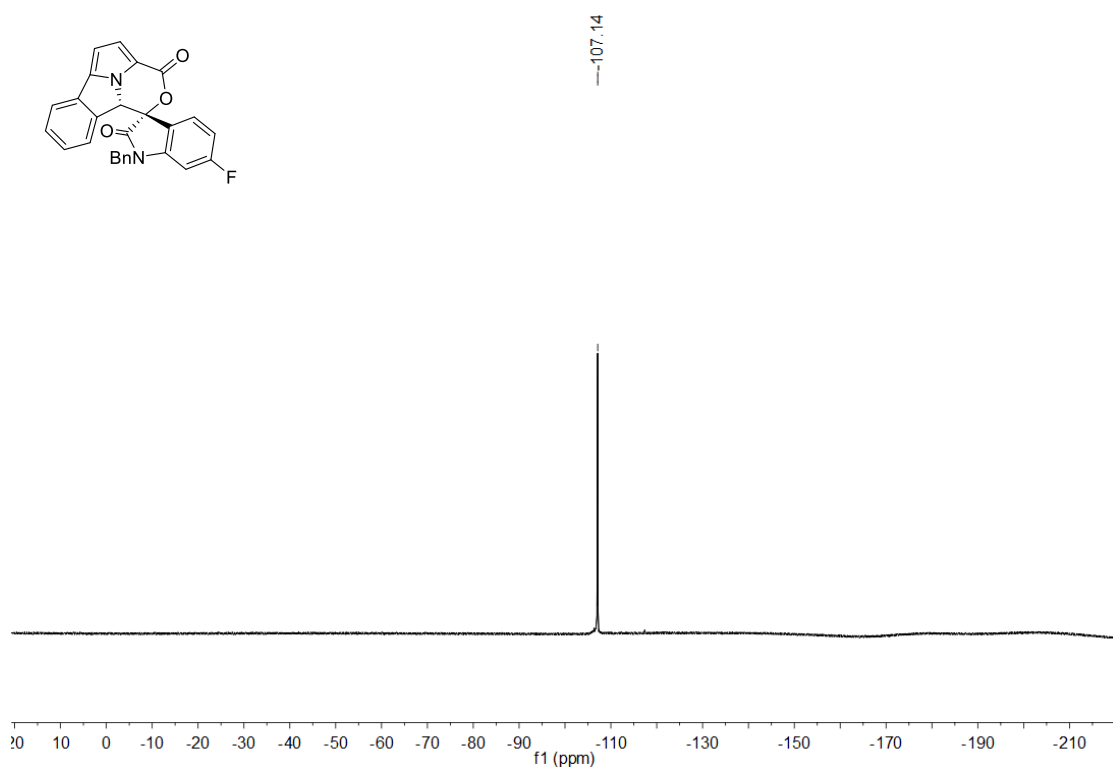

<sup>1</sup>H NMR spectrum **3q** in CD<sub>2</sub>Cl<sub>2</sub> (400 MHz)

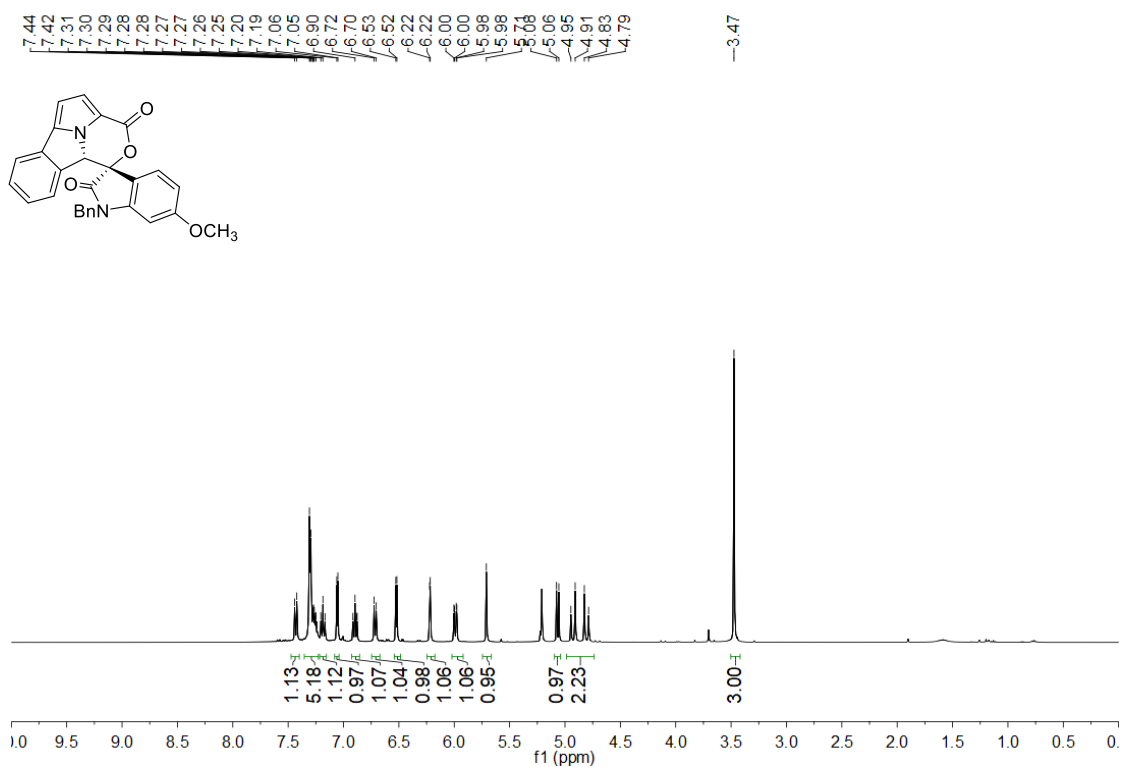

<sup>13</sup>C NMR spectrum **3q** in CD<sub>2</sub>Cl<sub>2</sub> (101 MHz)

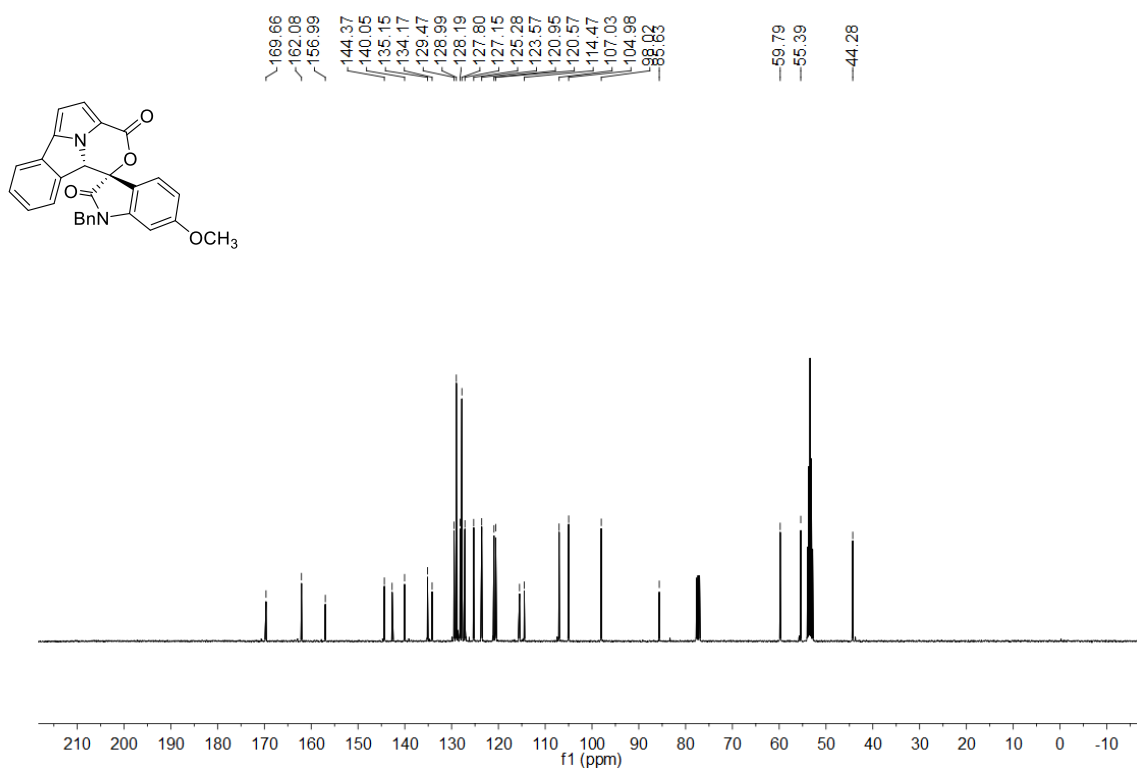



<sup>1</sup>H NMR spectrum **3r** in CD<sub>2</sub>Cl<sub>2</sub> (400 MHz)

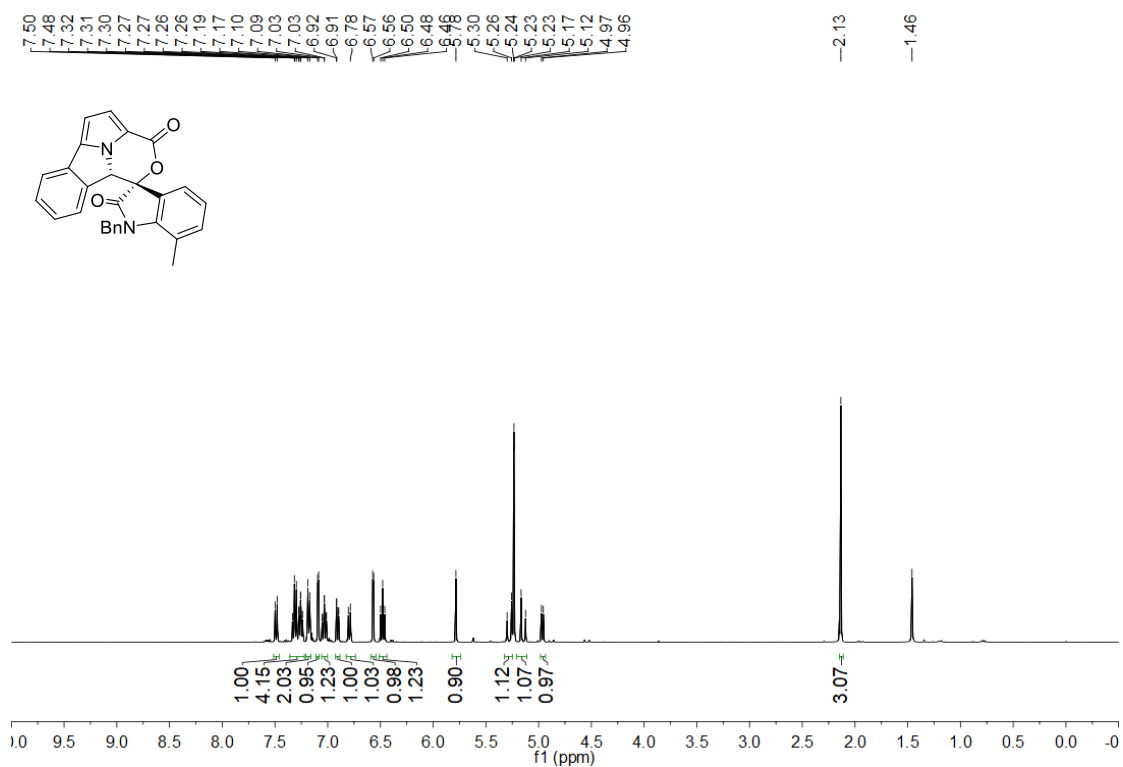

<sup>13</sup>C NMR spectrum **3r** in CD<sub>2</sub>Cl<sub>2</sub> (101 MHz)

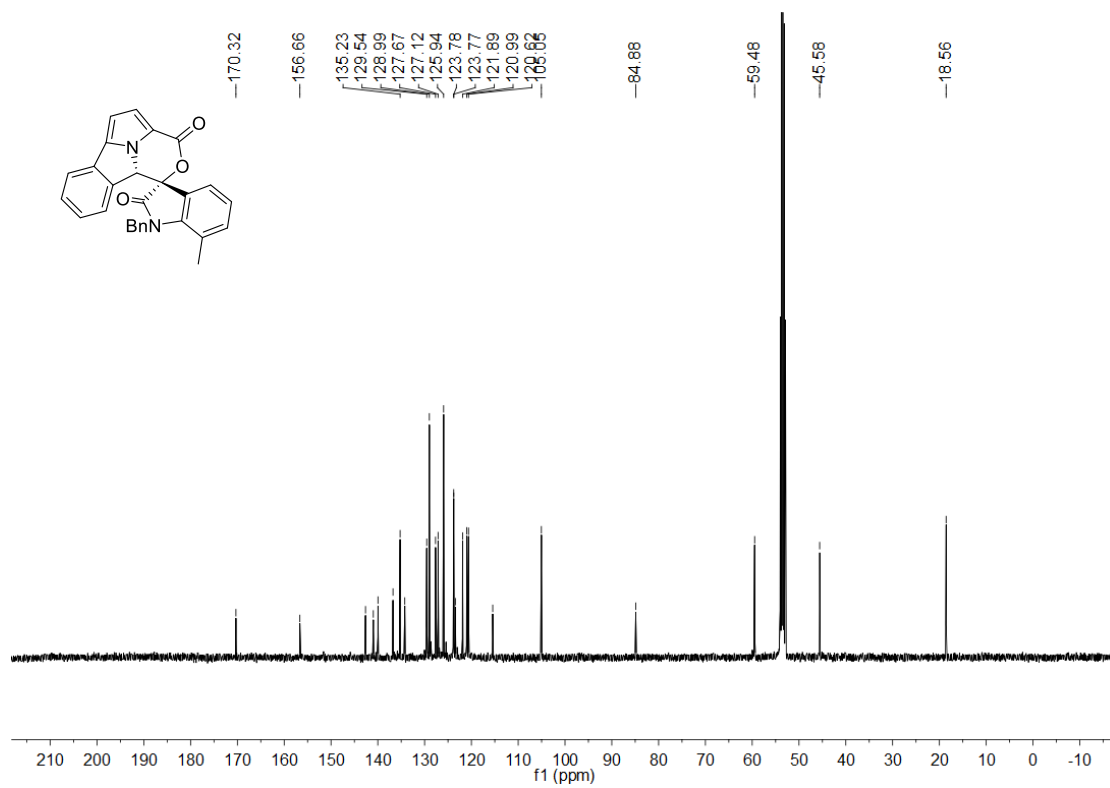

<sup>1</sup>H NMR spectrum **3s** in CD<sub>2</sub>Cl<sub>2</sub> (400 MHz)

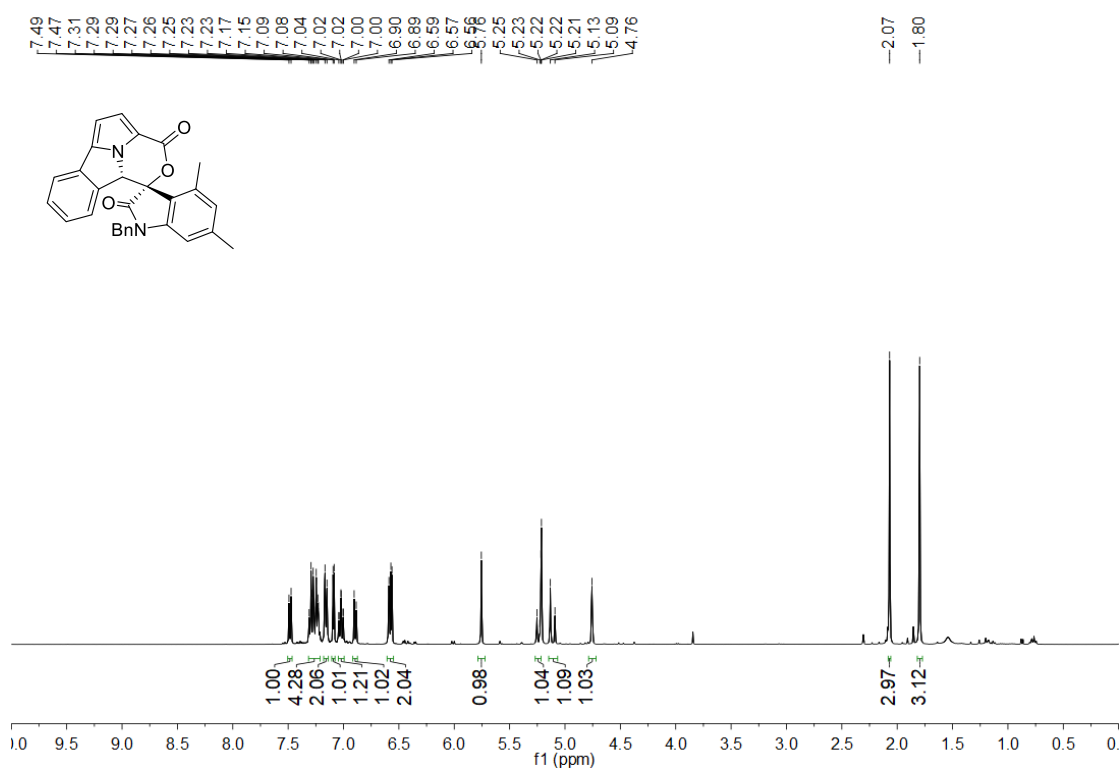

<sup>13</sup>C NMR spectrum **3s** in CDCl<sub>3</sub> (101 MHz)

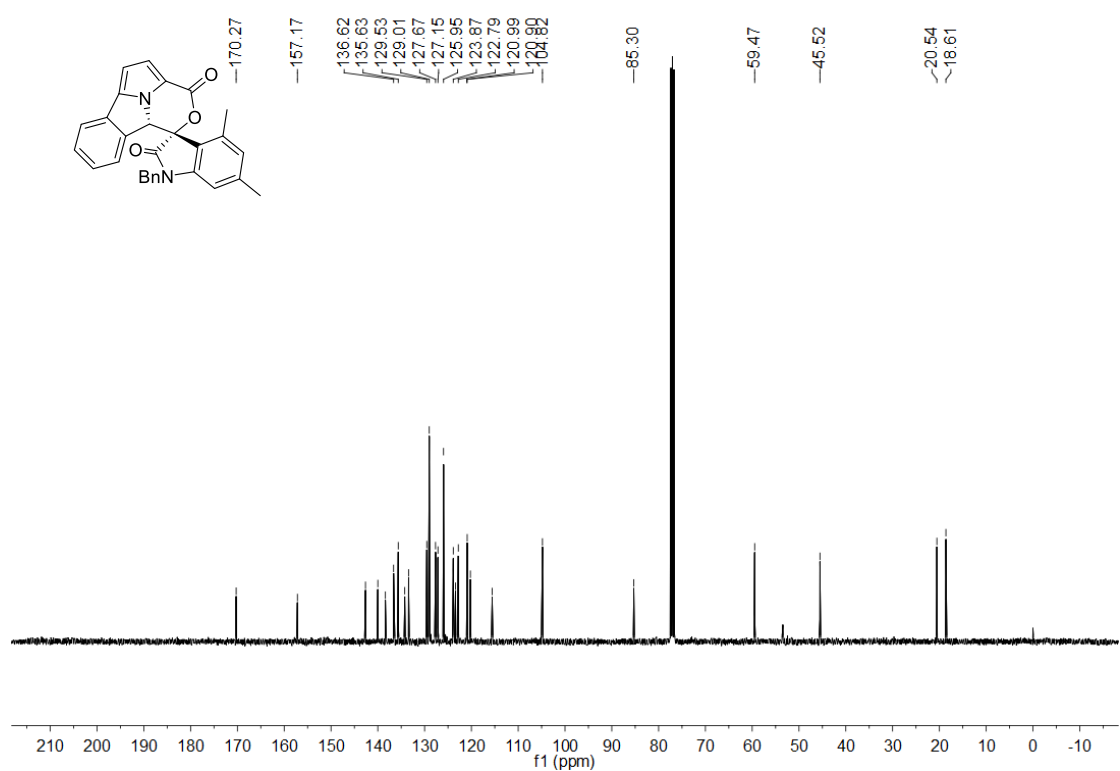

<sup>1</sup>H NMR spectrum **3t** in CD<sub>2</sub>Cl<sub>2</sub> (400 MHz)

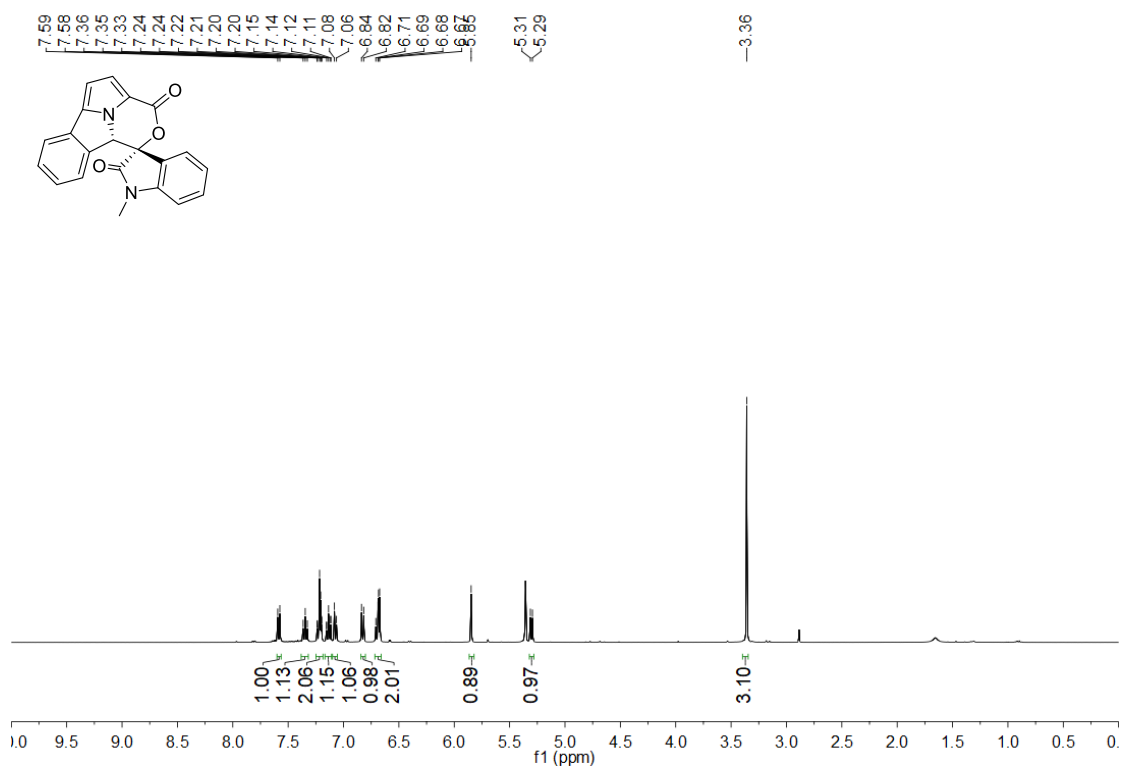

<sup>13</sup>C NMR spectrum **3t** in CD<sub>2</sub>Cl<sub>2</sub> (101 MHz)

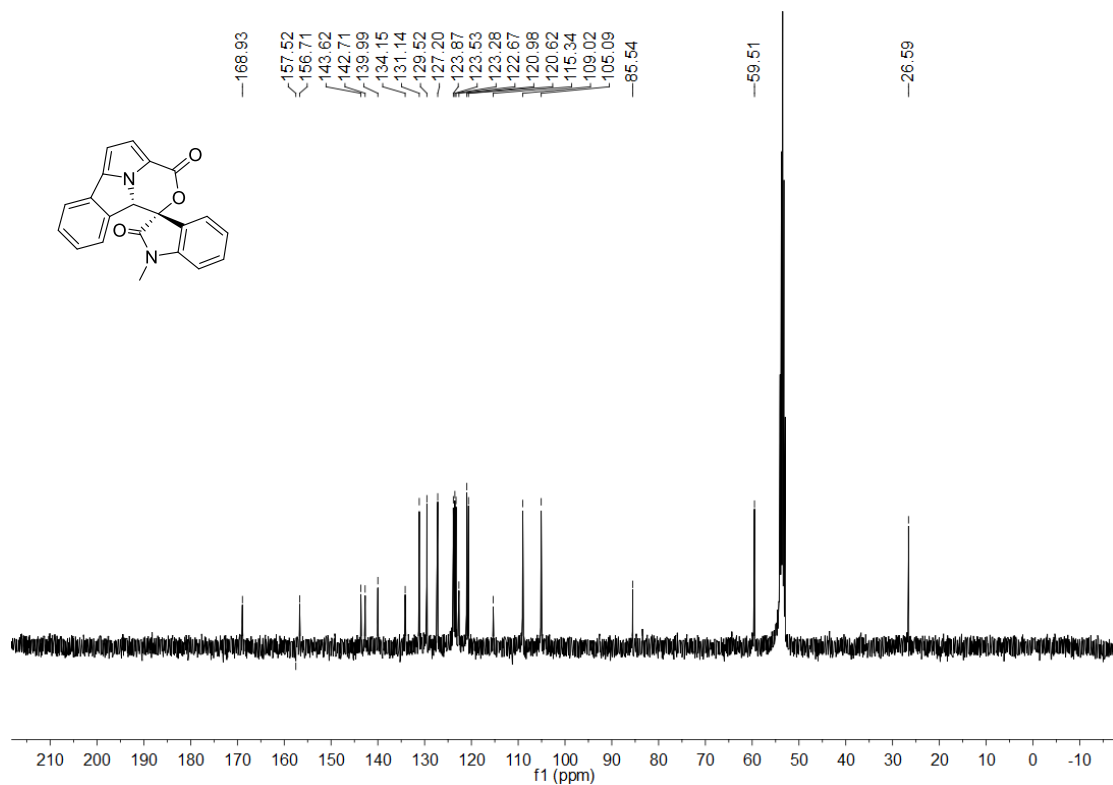

<sup>1</sup>H NMR spectrum **4** in CD<sub>2</sub>Cl<sub>2</sub> (400 MHz)

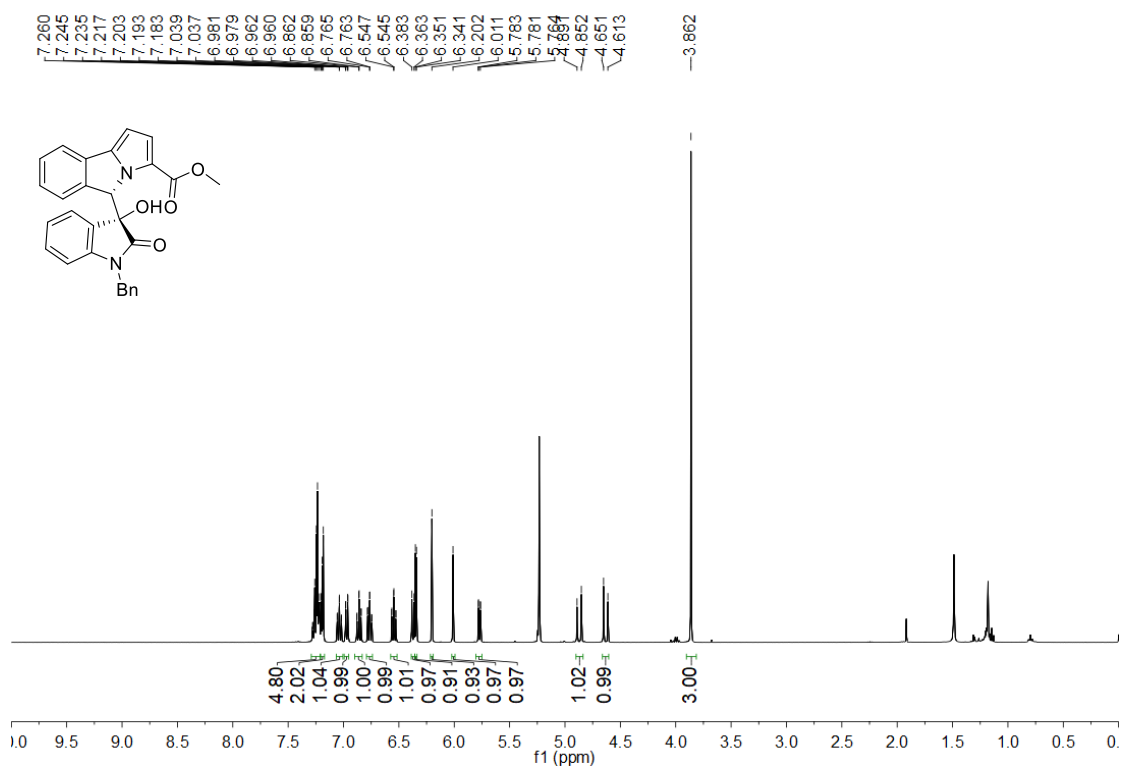

<sup>13</sup>C NMR spectrum **4** in CD<sub>2</sub>Cl<sub>2</sub> (101 MHz)

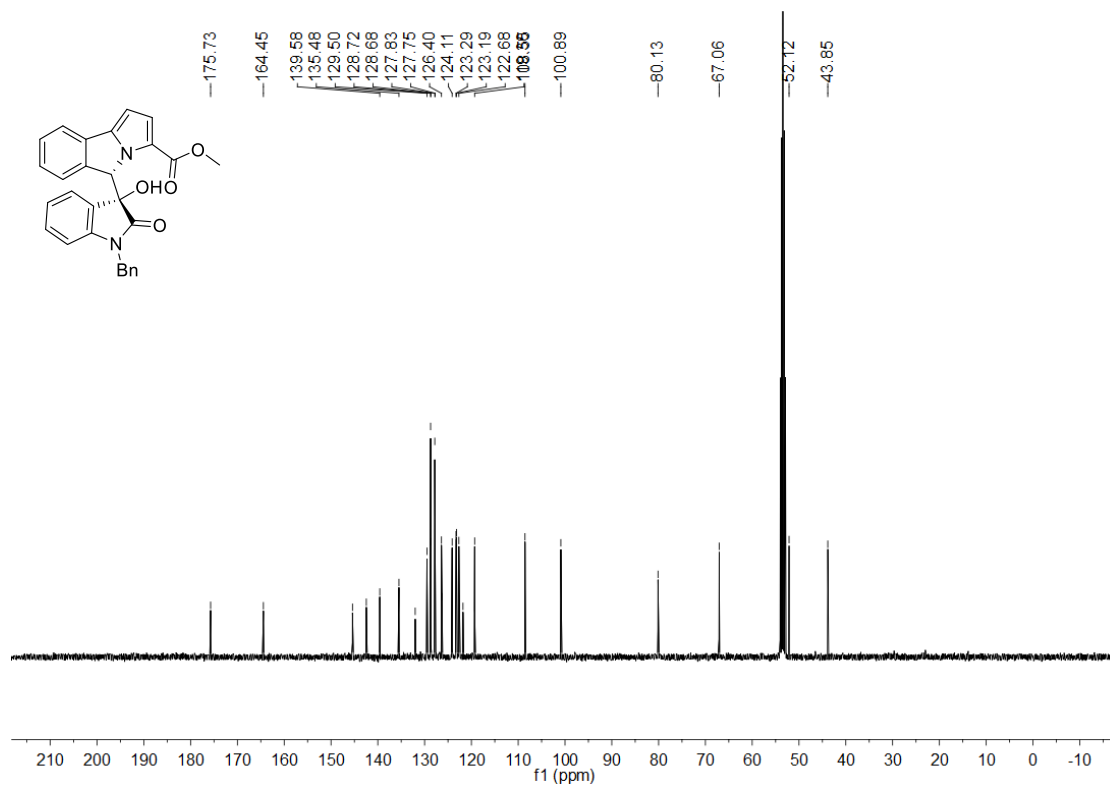

Supplement: d3cc00999h1.pdf [file d3cc00999h1.pdf]
